# Supplementary material for: High Expression of Pseudogene PTTG3P Indicates a Poor Prognosis in Human Breast Cancer
Source: PubMed Central journal article supplement (PMC6463746; doi:10.1016/j.omto.2019.03.006), 2019-03-27
Supplement: mmc1.pdf [file mmc1.pdf]

**OMTO, Volume 14**

**Supplemental Information**

**High Expression of Pseudogene PTTG3P Indicates  
a Poor Prognosis in Human Breast Cancer**

**Weiyang Lou, Bisha Ding, and Weimin Fan**

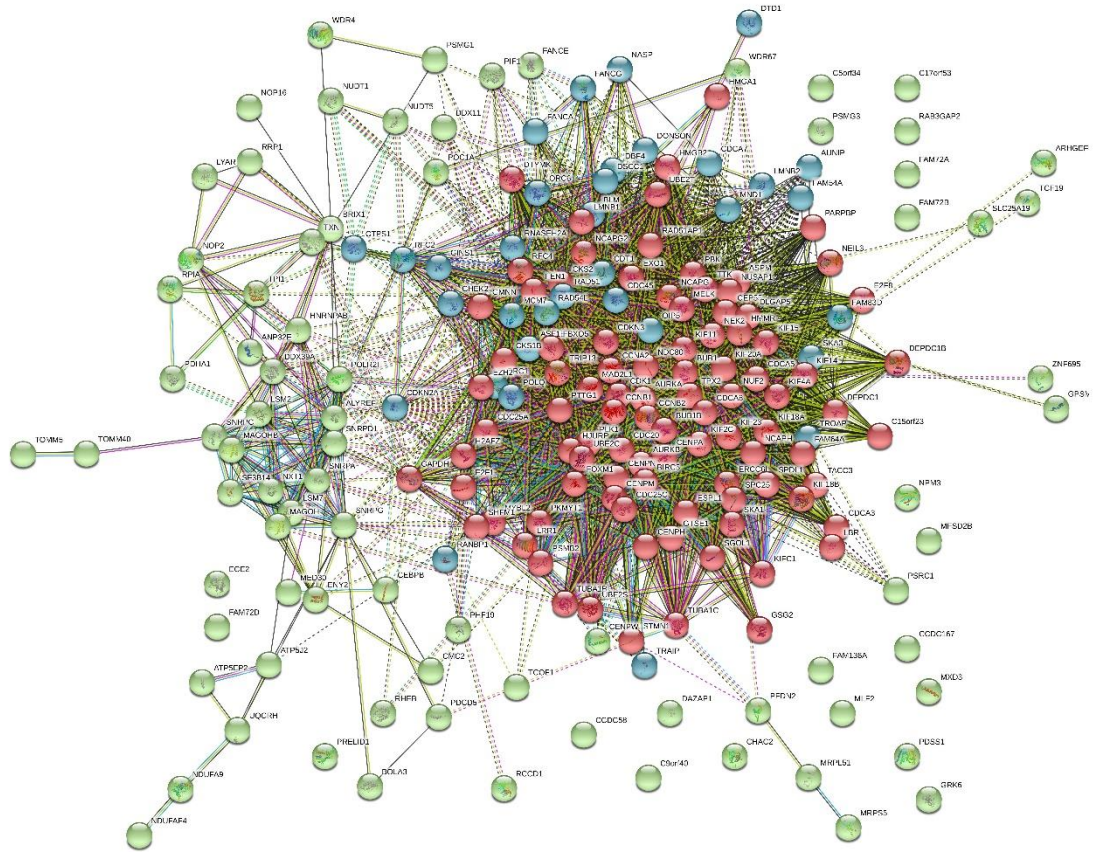

Figure S1. The protein-protein interaction network of the co-expressed genes of PTTG3P constructed by STRING V10.5.

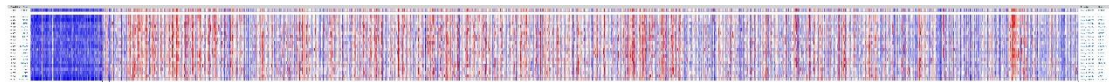

Figure S2. PTTG3P co-expression of genes analyzed using Oncomine database.

Table S1. The relationship between PTTG3P expression and different clinicopathological parameters of breast carcinoma.

| Variables    | Number | PTTG3P          |         |
|--------------|--------|-----------------|---------|
|              |        | mRNA expression | P-value |
| Age          |        |                 | 0.4159  |
| ≤ 51         | 1048   | -               |         |
| > 51         | 1449   | -               |         |
| Nodal Status |        |                 | 0.1266  |
| -            | 2041   | -               |         |
| +            | 1122   | -               |         |
| ER           |        |                 | <0.0001 |
| -            | 1142   | Up              |         |
| +            | 3162   | -               |         |
| PR           |        |                 | <0.0001 |
| -            | 700    | Up              |         |

|                        |      |    |                   |
|------------------------|------|----|-------------------|
| +                      | 1136 | -  |                   |
| HER2                   |      |    | 0.1423            |
| -                      | 1195 | -  |                   |
| +                      | 166  | -  |                   |
| Basal-like Status      |      |    | <b>&lt;0.0001</b> |
| Not                    | 3349 | -  |                   |
| Basal-like             | 916  | Up |                   |
| Triple-negative Status |      |    | <b>&lt;0.0001</b> |
| Not                    | 3299 | -  |                   |
| TNBC                   | 293  | Up |                   |
| NPI                    |      |    | <b>&lt;0.0001</b> |
| 1                      | 624  | -  |                   |
| 2                      | 486  | Up |                   |
| 3                      | 12   | Up |                   |
| SBR                    |      |    | <b>&lt;0.0001</b> |
| 1                      | 434  | -  |                   |
| 2                      | 1128 | Up |                   |
| 3                      | 1040 | Up |                   |

Table S2. The potential miRNA-target gene pairs predicted by miRNet.

| miRNA          | Gene    |
|----------------|---------|
| hsa-mir-129-5p | HBS1L   |
| hsa-mir-129-5p | SH3BP2  |
| hsa-mir-129-5p | SIX1    |
| hsa-mir-129-5p | SLC4A1  |
| hsa-mir-129-5p | SLC16A1 |
| hsa-mir-129-5p | SUMO2   |
| hsa-mir-129-5p | SNX2    |
| hsa-mir-129-5p | SOX4    |
| hsa-mir-129-5p | SOX12   |
| hsa-mir-129-5p | SP1     |
| hsa-mir-129-5p | STAR    |
| hsa-mir-129-5p | ADAM17  |
| hsa-mir-129-5p | TAGLN   |
| hsa-mir-129-5p | TAPBP   |
| hsa-mir-129-5p | TDGF1P3 |
| hsa-mir-129-5p | TEAD3   |
| hsa-mir-129-5p | TERF2   |
| hsa-mir-129-5p | NR2F2   |
| hsa-mir-129-5p | THRB    |
| hsa-mir-129-5p | TRAF3   |
| hsa-mir-129-5p | TRPS1   |
| hsa-mir-129-5p | TWIST1  |
| hsa-mir-129-5p | UBE2G2  |

|                |           |
|----------------|-----------|
| hsa-mir-129-5p | UBE2V2    |
| hsa-mir-129-5p | VIM       |
| hsa-mir-129-5p | VLDLR     |
| hsa-mir-129-5p | WEE1      |
| hsa-mir-129-5p | YES1      |
| hsa-mir-129-5p | YY1       |
| hsa-mir-129-5p | ZNF708    |
| hsa-mir-129-5p | ZNF154    |
| hsa-mir-129-5p | ZNF215    |
| hsa-mir-129-5p | ZNF226    |
| hsa-mir-129-5p | LAPTM5    |
| hsa-mir-129-5p | SLBP      |
| hsa-mir-129-5p | BRD3      |
| hsa-mir-129-5p | SLC25A16  |
| hsa-mir-129-5p | ADAM12    |
| hsa-mir-129-5p | RND2      |
| hsa-mir-129-5p | EOMES     |
| hsa-mir-129-5p | HIST1H4C  |
| hsa-mir-129-5p | TTF2      |
| hsa-mir-129-5p | SORBS2    |
| hsa-mir-129-5p | CBX4      |
| hsa-mir-129-5p | AKR7A2    |
| hsa-mir-129-5p | TP63      |
| hsa-mir-129-5p | NCOA1     |
| hsa-mir-129-5p | BECN1     |
| hsa-mir-129-5p | NOL4      |
| hsa-mir-129-5p | HIST1H2BJ |
| hsa-mir-129-5p | PIAS2     |
| hsa-mir-129-5p | MAP3K13   |
| hsa-mir-129-5p | VAPA      |
| hsa-mir-129-5p | TIAF1     |
| hsa-mir-129-5p | LRAT      |
| hsa-mir-129-5p | TBRG4     |
| hsa-mir-129-5p | RPS6KA5   |
| hsa-mir-129-5p | PIWIL1    |
| hsa-mir-129-5p | SNAP29    |
| hsa-mir-129-5p | RAB9A     |
| hsa-mir-129-5p | KIF3B     |
| hsa-mir-129-5p | CIAO1     |
| hsa-mir-129-5p | GRAP2     |
| hsa-mir-129-5p | ZRANB2    |
| hsa-mir-129-5p | CRIP1     |
| hsa-mir-129-5p | KCNK6     |
| hsa-mir-129-5p | HOMER1    |

|                |          |
|----------------|----------|
| hsa-mir-129-5p | RASAL2   |
| hsa-mir-129-5p | AKAP5    |
| hsa-mir-129-5p | ADAMTS4  |
| hsa-mir-129-5p | SPTLC2   |
| hsa-mir-129-5p | EI24     |
| hsa-mir-129-5p | H6PD     |
| hsa-mir-129-5p | GABBR2   |
| hsa-mir-129-5p | CLOCK    |
| hsa-mir-129-5p | RNF14    |
| hsa-mir-129-5p | ABCG1    |
| hsa-mir-129-5p | USP6NL   |
| hsa-mir-129-5p | SEMA3E   |
| hsa-mir-129-5p | KIAA0408 |
| hsa-mir-129-5p | CCP110   |
| hsa-mir-129-5p | JAKMIP2  |
| hsa-mir-129-5p | SEC24D   |
| hsa-mir-129-5p | ZC3H11A  |
| hsa-mir-129-5p | PAN2     |
| hsa-mir-129-5p | ZBTB5    |
| hsa-mir-129-5p | CCS      |
| hsa-mir-129-5p | SH2B3    |
| hsa-mir-129-5p | HMGXB4   |
| hsa-mir-129-5p | ABCC5    |
| hsa-mir-129-5p | ACTR1A   |
| hsa-mir-129-5p | TRIM13   |
| hsa-mir-129-5p | CALCOCO2 |
| hsa-mir-129-5p | SF3A1    |
| hsa-mir-129-5p | MCRS1    |
| hsa-mir-129-5p | FST      |
| hsa-mir-129-5p | TRIM38   |
| hsa-mir-129-5p | ANP32B   |
| hsa-mir-129-5p | RABAC1   |
| hsa-mir-129-5p | COLEC10  |
| hsa-mir-129-5p | CDC42EP3 |
| hsa-mir-129-5p | IGF2BP3  |
| hsa-mir-129-5p | IGF2BP2  |
| hsa-mir-129-5p | CD226    |
| hsa-mir-129-5p | DCTN6    |
| hsa-mir-129-5p | TNFSF13B |
| hsa-mir-129-5p | GMEB1    |
| hsa-mir-129-5p | UGT2B11  |
| hsa-mir-129-5p | POLQ     |
| hsa-mir-129-5p | MAP3K2   |
| hsa-mir-129-5p | ABL2     |

|                |        |
|----------------|--------|
| hsa-mir-129-5p | ADD3   |
| hsa-mir-129-5p | AK1    |
| hsa-mir-129-5p | APC    |
| hsa-mir-129-5p | XIAP   |
| hsa-mir-129-5p | ARSD   |
| hsa-mir-129-5p | ARSE   |
| hsa-mir-129-5p | ZFHX3  |
| hsa-mir-129-5p | ATRX   |
| hsa-mir-129-5p | AZF1   |
| hsa-mir-129-5p | BCL7A  |
| hsa-mir-129-5p | BDKRB2 |
| hsa-mir-129-5p | BID    |
| hsa-mir-129-5p | PRDM1  |
| hsa-mir-129-5p | BMPR2  |
| hsa-mir-129-5p | C1S    |
| hsa-mir-129-5p | CACNG1 |
| hsa-mir-129-5p | CALM1  |
| hsa-mir-129-5p | CBS    |
| hsa-mir-129-5p | CDH1   |
| hsa-mir-129-5p | CDK6   |
| hsa-mir-129-5p | CHRM2  |
| hsa-mir-129-5p | AP1S1  |
| hsa-mir-129-5p | CCR4   |
| hsa-mir-129-5p | CCR6   |
| hsa-mir-129-5p | COL1A1 |
| hsa-mir-129-5p | COL9A2 |
| hsa-mir-129-5p | KLF6   |
| hsa-mir-129-5p | COX6B1 |
| hsa-mir-129-5p | CPE    |
| hsa-mir-129-5p | CPT1A  |
| hsa-mir-129-5p | HAPLN1 |
| hsa-mir-129-5p | MAPK14 |
| hsa-mir-129-5p | VCAN   |
| hsa-mir-129-5p | CTNS   |
| hsa-mir-129-5p | DAB2   |
| hsa-mir-129-5p | DARS   |
| hsa-mir-129-5p | DDX3X  |
| hsa-mir-129-5p | DMXL1  |
| hsa-mir-129-5p | TIMM8A |
| hsa-mir-129-5p | DNAH9  |
| hsa-mir-129-5p | ARID3A |
| hsa-mir-129-5p | DSG3   |
| hsa-mir-129-5p | DUSP1  |
| hsa-mir-129-5p | EBF1   |

|                |         |
|----------------|---------|
| hsa-mir-129-5p | EFNB1   |
| hsa-mir-129-5p | EIF1AX  |
| hsa-mir-129-5p | EMP2    |
| hsa-mir-129-5p | EP300   |
| hsa-mir-129-5p | EPB41L1 |
| hsa-mir-129-5p | EPB42   |
| hsa-mir-129-5p | EPS8    |
| hsa-mir-129-5p | ESD     |
| hsa-mir-129-5p | ESR1    |
| hsa-mir-129-5p | ETV6    |
| hsa-mir-129-5p | ACSL4   |
| hsa-mir-129-5p | FMR1    |
| hsa-mir-129-5p | FRK     |
| hsa-mir-129-5p | KDSR    |
| hsa-mir-129-5p | GABRB1  |
| hsa-mir-129-5p | GALNT1  |
| hsa-mir-129-5p | GDNF    |
| hsa-mir-129-5p | GFPT1   |
| hsa-mir-129-5p | GLUL    |
| hsa-mir-129-5p | GM2A    |
| hsa-mir-129-5p | GNAL    |
| hsa-mir-129-5p | GNAQ    |
| hsa-mir-129-5p | GRM3    |
| hsa-mir-129-5p | GTF2H1  |
| hsa-mir-129-5p | HMGB1   |
| hsa-mir-129-5p | HNF4G   |
| hsa-mir-129-5p | HNRNPA1 |
| hsa-mir-129-5p | HOXD11  |
| hsa-mir-129-5p | SP110   |
| hsa-mir-129-5p | IGF1    |
| hsa-mir-129-5p | IL10RB  |
| hsa-mir-129-5p | IL12RB2 |
| hsa-mir-129-5p | IMPA2   |
| hsa-mir-129-5p | IREB2   |
| hsa-mir-129-5p | CD82    |
| hsa-mir-129-5p | KCNJ3   |
| hsa-mir-129-5p | KCNJ6   |
| hsa-mir-129-5p | L1CAM   |
| hsa-mir-129-5p | LIMS1   |
| hsa-mir-129-5p | FADS1   |
| hsa-mir-129-5p | LPP     |
| hsa-mir-129-5p | CAPRIN1 |
| hsa-mir-129-5p | MBD1    |
| hsa-mir-129-5p | MBL2    |

|                |         |
|----------------|---------|
| hsa-mir-129-5p | MCM4    |
| hsa-mir-129-5p | MLLT6   |
| hsa-mir-129-5p | MYO10   |
| hsa-mir-129-5p | NDUFV3  |
| hsa-mir-129-5p | NEUROD2 |
| hsa-mir-129-5p | NFATC2  |
| hsa-mir-129-5p | NFIB    |
| hsa-mir-129-5p | NFRKB   |
| hsa-mir-129-5p | NOTCH1  |
| hsa-mir-129-5p | NPTX1   |
| hsa-mir-129-5p | NR4A2   |
| hsa-mir-129-5p | OMD     |
| hsa-mir-129-5p | PAX7    |
| hsa-mir-129-5p | PCK1    |
| hsa-mir-129-5p | PCM1    |
| hsa-mir-129-5p | PDE3A   |
| hsa-mir-129-5p | PDGFRA  |
| hsa-mir-129-5p | PDPK1   |
| hsa-mir-129-5p | ABCB1   |
| hsa-mir-129-5p | PIK3C3  |
| hsa-mir-129-5p | PITX1   |
| hsa-mir-129-5p | PLSCR1  |
| hsa-mir-129-5p | POLR2D  |
| hsa-mir-129-5p | POU2F2  |
| hsa-mir-129-5p | POU3F1  |
| hsa-mir-129-5p | PPARA   |
| hsa-mir-129-5p | PRKCD   |
| hsa-mir-129-5p | MAPK1   |
| hsa-mir-129-5p | MAP2K2  |
| hsa-mir-129-5p | PRKX    |
| hsa-mir-129-5p | PSMB9   |
| hsa-mir-129-5p | PTMA    |
| hsa-mir-129-5p | PTPN2   |
| hsa-mir-129-5p | PTPN14  |
| hsa-mir-129-5p | PVR     |
| hsa-mir-129-5p | RAB13   |
| hsa-mir-129-5p | RAB27A  |
| hsa-mir-129-5p | RANGAP1 |
| hsa-mir-129-5p | RBBP4   |
| hsa-mir-129-5p | RET     |
| hsa-mir-129-5p | RGS16   |
| hsa-mir-129-5p | RORA    |
| hsa-mir-129-5p | RPS23   |
| hsa-mir-129-5p | SATB1   |



|                |           |       |
|----------------|-----------|-------|
| hsa-mir-129-5p | SCN2B     |       |
| hsa-mir-129-5p | LMBRD2    |       |
| hsa-mir-129-5p | TIMM50    |       |
| hsa-mir-129-5p | FOXP2     |       |
| hsa-mir-129-5p | SYAP1     |       |
| hsa-mir-129-5p | TP53INP1  |       |
| hsa-mir-129-5p | CEP41     |       |
| hsa-mir-129-5p | GLCCI1    |       |
| hsa-mir-129-5p | LACTB     |       |
| hsa-mir-129-5p | GALNT13   |       |
| hsa-mir-129-5p | OSBPL10   |       |
| hsa-mir-129-5p |           | 3-Mar |
| hsa-mir-129-5p | ZNF554    |       |
| hsa-mir-129-5p | WDR92     |       |
| hsa-mir-129-5p | FAM210B   |       |
| hsa-mir-129-5p | GINM1     |       |
| hsa-mir-129-5p | EXOC3-AS1 |       |
| hsa-mir-129-5p | SNAP47    |       |
| hsa-mir-129-5p | LEAP2     |       |
| hsa-mir-129-5p | DEFB118   |       |
| hsa-mir-129-5p | EXOSC6    |       |
| hsa-mir-129-5p | FGD4      |       |
| hsa-mir-129-5p | ANKRD9    |       |
| hsa-mir-129-5p | ISCA2     |       |
| hsa-mir-129-5p | FSD2      |       |
| hsa-mir-129-5p | SGK494    |       |
| hsa-mir-129-5p | ZNF440    |       |
| hsa-mir-129-5p | SWSAP1    |       |
| hsa-mir-129-5p | ZNF573    |       |
| hsa-mir-129-5p | TRABD2A   |       |
| hsa-mir-129-5p | TYW5      |       |
| hsa-mir-129-5p | GALM      |       |
| hsa-mir-129-5p | OCIAD2    |       |
| hsa-mir-129-5p | FAM241A   |       |
| hsa-mir-129-5p | RAET1E    |       |
| hsa-mir-129-5p | MPLKIP    |       |
| hsa-mir-129-5p | UNC5D     |       |
| hsa-mir-129-5p | SLITRK4   |       |
| hsa-mir-129-5p | OTUD6A    |       |
| hsa-mir-129-5p | SPIN4     |       |
| hsa-mir-129-5p | ASB8      |       |
| hsa-mir-129-5p | BRI3BP    |       |
| hsa-mir-129-5p | UBE2F     |       |
| hsa-mir-129-5p | WFDC6     |       |

|                |           |
|----------------|-----------|
| hsa-mir-129-5p | SESN3     |
| hsa-mir-129-5p | TMEM120B  |
| hsa-mir-129-5p | HNRNPA1L2 |
| hsa-mir-129-5p | CMTM4     |
| hsa-mir-129-5p | WIPF2     |
| hsa-mir-129-5p | CLDN19    |
| hsa-mir-129-5p | BTBD19    |
| hsa-mir-129-5p | TTL       |
| hsa-mir-129-5p | CKAP2L    |
| hsa-mir-129-5p | C2orf15   |
| hsa-mir-129-5p | GPR155    |
| hsa-mir-129-5p | DTX3L     |
| hsa-mir-129-5p | PPM1K     |
| hsa-mir-129-5p | SLC38A9   |
| hsa-mir-129-5p | SRFBP1    |
| hsa-mir-129-5p | PRELID2   |
| hsa-mir-129-5p | RUNDC3B   |
| hsa-mir-129-5p | METTTL27  |
| hsa-mir-129-5p | TTC39B    |
| hsa-mir-129-5p | ZDHHC15   |
| hsa-mir-129-5p | ZNF519    |
| hsa-mir-129-5p | KANK4     |
| hsa-mir-129-5p | PARP15    |
| hsa-mir-129-5p | FUT11     |
| hsa-mir-129-5p | ADAMTS18  |
| hsa-mir-129-5p | ZNF384    |
| hsa-mir-129-5p | AGO3      |
| hsa-mir-129-5p | AGO4      |
| hsa-mir-129-5p | VSTM4     |
| hsa-mir-129-5p | IBA57     |
| hsa-mir-129-5p | PDE12     |
| hsa-mir-129-5p | LRRC55    |
| hsa-mir-129-5p | ZNF25     |
| hsa-mir-129-5p | FAM124A   |
| hsa-mir-129-5p | HNRNPA3   |
| hsa-mir-129-5p | C10orf111 |
| hsa-mir-129-5p | C6orf223  |
| hsa-mir-129-5p | OARD1     |
| hsa-mir-129-5p | ZNRF2     |
| hsa-mir-129-5p | MCOLN2    |
| hsa-mir-129-5p | TMEM151A  |
| hsa-mir-129-5p | ANKS4B    |
| hsa-mir-129-5p | MAGI3     |
| hsa-mir-129-5p | AUTS8     |

|                |           |
|----------------|-----------|
| hsa-mir-129-5p | KCNRG     |
| hsa-mir-129-5p | ZFP82     |
| hsa-mir-129-5p | NWD1      |
| hsa-mir-129-5p | SEC14L4   |
| hsa-mir-129-5p | RNF149    |
| hsa-mir-129-5p | PRRT3     |
| hsa-mir-129-5p | CEP57L1   |
| hsa-mir-129-5p | SCAI      |
| hsa-mir-129-5p | POTED     |
| hsa-mir-129-5p | MMAB      |
| hsa-mir-129-5p | CYP27C1   |
| hsa-mir-129-5p | ZDHHC21   |
| hsa-mir-129-5p |           |
| hsa-mir-129-5p | FAM71F2   |
| hsa-mir-129-5p | ZNF429    |
| hsa-mir-129-5p | ZNF699    |
| hsa-mir-129-5p | TMEM233   |
| hsa-mir-129-5p | LINC01551 |
| hsa-mir-129-5p | PLEKHM3   |
| hsa-mir-129-5p | ONECUT3   |
| hsa-mir-129-5p | ZNF793    |
| hsa-mir-129-5p | C7orf65   |
| hsa-mir-129-5p | YY2       |
| hsa-mir-129-5p | SRCAP     |
| hsa-mir-129-5p | RAB10     |
| hsa-mir-129-5p | SF3A3     |
| hsa-mir-129-5p | PNRC1     |
| hsa-mir-129-5p | ACOT2     |
| hsa-mir-129-5p | CKAP4     |
| hsa-mir-129-5p | CCNI      |
| hsa-mir-129-5p | FGFR1OP   |
| hsa-mir-129-5p | PLA2G16   |
| hsa-mir-129-5p | NUDT3     |
| hsa-mir-129-5p | FAM107A   |
| hsa-mir-129-5p | ZNF277    |
| hsa-mir-129-5p | SLC2A6    |
| hsa-mir-129-5p | AKAP10    |
| hsa-mir-129-5p | DUSP10    |
| hsa-mir-129-5p | PXMP4     |
| hsa-mir-129-5p | IKZF3     |
| hsa-mir-129-5p | NTNG1     |
| hsa-mir-129-5p | FNDC3A    |
| hsa-mir-129-5p | MLXIP     |
| hsa-mir-129-5p | MON1B     |

14-Sep

|                |          |
|----------------|----------|
| hsa-mir-129-5p | DIS3     |
| hsa-mir-129-5p | EPN2     |
| hsa-mir-129-5p | IGSF9B   |
| hsa-mir-129-5p | EXPH5    |
| hsa-mir-129-5p | TNRC6B   |
| hsa-mir-129-5p | RAD54L2  |
| hsa-mir-129-5p | NUP205   |
| hsa-mir-129-5p | TLL12    |
| hsa-mir-129-5p | METAP1   |
| hsa-mir-129-5p | LPIN1    |
| hsa-mir-129-5p | ARL6IP1  |
| hsa-mir-129-5p | CAMTA1   |
| hsa-mir-129-5p | ICOSLG   |
| hsa-mir-129-5p | KIAA0930 |
| hsa-mir-129-5p | TTC28    |
| hsa-mir-129-5p | DPY19L1  |
| hsa-mir-129-5p | RYBP     |
| hsa-mir-129-5p | SLC44A1  |
| hsa-mir-129-5p | CBX6     |
| hsa-mir-129-5p | POFUT1   |
| hsa-mir-129-5p | KAT6B    |
| hsa-mir-129-5p | ACAP2    |
| hsa-mir-129-5p | ADAT1    |
| hsa-mir-129-5p | NUP62    |
| hsa-mir-129-5p | TMEM245  |
| hsa-mir-129-5p | HYPK     |
| hsa-mir-129-5p | MTO1     |
| hsa-mir-129-5p | FBXL2    |
| hsa-mir-129-5p | TECPR1   |
| hsa-mir-129-5p | LETMD1   |
| hsa-mir-129-5p | RTTN     |
| hsa-mir-129-5p | NGDN     |
| hsa-mir-129-5p | TKFC     |
| hsa-mir-129-5p | NSMF     |
| hsa-mir-129-5p | ZNF500   |
| hsa-mir-129-5p | TIAM2    |
| hsa-mir-129-5p | TIMM8B   |
| hsa-mir-129-5p | OSTF1    |
| hsa-mir-129-5p | ZNF285   |
| hsa-mir-129-5p | RNF11    |
| hsa-mir-129-5p | FAM184B  |
| hsa-mir-129-5p | SIGLEC9  |
| hsa-mir-129-5p | RPS6KA6  |
| hsa-mir-129-5p | P2RY10   |

|                |          |
|----------------|----------|
| hsa-mir-129-5p | RRP7A    |
| hsa-mir-129-5p | POLL     |
| hsa-mir-129-5p | APOBEC3C |
| hsa-mir-129-5p | OSTM1    |
| hsa-mir-129-5p | SPCS1    |
| hsa-mir-129-5p | DNAJC15  |
| hsa-mir-129-5p | CFAP20   |
| hsa-mir-129-5p | PRICKLE4 |
| hsa-mir-129-5p | STRN3    |
| hsa-mir-129-5p | KCNIP3   |
| hsa-mir-129-5p | ST8SIA3  |
| hsa-mir-129-5p | YARS2    |
| hsa-mir-129-5p | MEMO1    |
| hsa-mir-129-5p | MRPL4    |
| hsa-mir-129-5p | KLHL5    |
| hsa-mir-129-5p | ABHD5    |
| hsa-mir-129-5p | RDH11    |
| hsa-mir-129-5p | HSD17B12 |
| hsa-mir-129-5p | PLEKHO1  |
| hsa-mir-129-5p | GLTP     |
| hsa-mir-129-5p | CRIM1    |
| hsa-mir-129-5p | PHF21A   |
| hsa-mir-129-5p | TAOK3    |
| hsa-mir-129-5p | UFM1     |
| hsa-mir-129-5p | MRPS23   |
| hsa-mir-129-5p | CHMP3    |
| hsa-mir-129-5p | LSM8     |
| hsa-mir-129-5p | EMCN     |
| hsa-mir-129-5p | ATP8A2   |
| hsa-mir-129-5p | WNT4     |
| hsa-mir-129-5p | RBM47    |
| hsa-mir-129-5p | GNL3L    |
| hsa-mir-129-5p | RSBN1    |
| hsa-mir-129-5p | DYM      |
| hsa-mir-129-5p | TRPM7    |
| hsa-mir-129-5p | GIN1     |
| hsa-mir-129-5p | BIVM     |
| hsa-mir-129-5p | PGPEP1   |
| hsa-mir-129-5p | CNTLN    |
| hsa-mir-129-5p | MTMR10   |
| hsa-mir-129-5p | LAX1     |
| hsa-mir-129-5p | TTC19    |
| hsa-mir-129-5p | TRMT10C  |
| hsa-mir-129-5p | RNF125   |

|                |          |
|----------------|----------|
| hsa-mir-129-5p | PIGX     |
| hsa-mir-129-5p | SLC35F6  |
| hsa-mir-129-5p | TTC38    |
| hsa-mir-129-5p | PHIP     |
| hsa-mir-129-5p | PTCD3    |
| hsa-mir-129-5p | TMEM51   |
| hsa-mir-129-5p | FIGN     |
| hsa-mir-129-5p | THAP1    |
| hsa-mir-129-5p | LINS1    |
| hsa-mir-129-5p | RIF1     |
| hsa-mir-129-5p | SBNO1    |
| hsa-mir-129-5p | UBA6     |
| hsa-mir-129-5p | ELP2     |
| hsa-mir-129-5p | CHDH     |
| hsa-mir-129-5p | DHTKD1   |
| hsa-mir-129-5p | FEM1A    |
| hsa-mir-129-5p | SVOP     |
| hsa-mir-129-5p | SLC30A10 |
| hsa-mir-129-5p | SOX6     |
| hsa-mir-129-5p | CDV3     |
| hsa-mir-129-5p | LRRC40   |
| hsa-mir-129-5p | DENND4C  |
| hsa-mir-129-5p | LUC7L    |
| hsa-mir-129-5p | TMEM30A  |
| hsa-mir-129-5p | FGD6     |
| hsa-mir-129-5p | DCP1A    |
| hsa-mir-129-5p | CENPN    |
| hsa-mir-129-5p | CISD1    |
| hsa-mir-129-5p | C21orf62 |
| hsa-mir-129-5p | CTNBL1   |
| hsa-mir-129-5p | PARD3    |
| hsa-mir-129-5p | SAR1A    |
| hsa-mir-129-5p | LHX9     |
| hsa-mir-129-5p | YAE1D1   |
| hsa-mir-129-5p | LYRM4    |
| hsa-mir-129-5p | MAN1C1   |
| hsa-mir-129-5p | PAK5     |
| hsa-mir-129-5p | NIPAL3   |
| hsa-mir-129-5p | ERGIC1   |
| hsa-mir-129-5p | SMAGP    |
| hsa-mir-129-5p | GJD2     |
| hsa-mir-129-5p | LRTM1    |
| hsa-mir-129-5p | AS3MT    |
| hsa-mir-129-5p | ISY1     |

|                |          |
|----------------|----------|
| hsa-mir-129-5p | HEG1     |
| hsa-mir-129-5p | MTA3     |
| hsa-mir-129-5p | PCDH19   |
| hsa-mir-129-5p | KCTD16   |
| hsa-mir-129-5p | TAOK1    |
| hsa-mir-129-5p | SEMA6A   |
| hsa-mir-129-5p | CEP126   |
| hsa-mir-129-5p | FNIP2    |
| hsa-mir-129-5p | SLAIN2   |
| hsa-mir-129-5p | POGK     |
| hsa-mir-129-5p | USP28    |
| hsa-mir-129-5p | KIAA1549 |
| hsa-mir-129-5p | ZFP14    |
| hsa-mir-129-5p | GATAD1   |
| hsa-mir-129-5p | ZNF410   |
| hsa-mir-129-5p | ZNF462   |
| hsa-mir-129-5p | PBOV1    |
| hsa-mir-129-5p | ANKEF1   |
| hsa-mir-129-5p | RBM26    |
| hsa-mir-129-5p | RRAGC    |
| hsa-mir-129-5p | PAPD5    |
| hsa-mir-129-5p | GMCL1    |
| hsa-mir-129-5p | NOM1     |
| hsa-mir-129-5p | UNKL     |
| hsa-mir-129-5p | REEP1    |
| hsa-mir-129-5p | COA7     |
| hsa-mir-129-5p | SLC2A11  |
| hsa-mir-129-5p | METRN    |
| hsa-mir-129-5p | ZNF655   |
| hsa-mir-129-5p | TSEN34   |
| hsa-mir-129-5p | C1orf50  |
| hsa-mir-129-5p | SMIM7    |
| hsa-mir-129-5p | TTPAL    |
| hsa-mir-129-5p | DCAF10   |
| hsa-mir-129-5p | GLB1L    |
| hsa-mir-129-5p | LRRC2    |
| hsa-mir-129-5p | NKAIN1   |
| hsa-mir-129-5p | CERS4    |
| hsa-mir-129-5p | ZYG11B   |
| hsa-mir-129-5p | AAGAB    |
| hsa-mir-129-5p | ZNF419   |
| hsa-mir-129-5p | GSTCD    |
| hsa-mir-129-5p | PTCD2    |
| hsa-mir-129-5p | METTTL8  |

|                |           |
|----------------|-----------|
| hsa-mir-129-5p | TNIP3     |
| hsa-mir-129-5p | KIAA0319L |
| hsa-mir-129-5p | SLC35E1   |
| hsa-mir-129-5p | TRMT2B    |
| hsa-mir-129-5p | FBXL18    |
| hsa-mir-129-5p | C3orf36   |
| hsa-mir-129-5p | BICC1     |
| hsa-mir-129-5p | ZNF703    |
| hsa-mir-129-5p | ORAI2     |
| hsa-mir-129-5p | KLHL15    |
| hsa-mir-129-5p | EPC1      |
| hsa-mir-129-5p | WDR82     |
| hsa-mir-129-5p | PNPLA3    |
| hsa-mir-129-5p | APOL6     |
| hsa-mir-129-5p | LMAN2L    |
| hsa-mir-129-5p | PLA2G12A  |
| hsa-mir-129-5p | FAM83D    |
| hsa-mir-129-5p | TSPAN14   |
| hsa-mir-129-5p | SPRY4     |
| hsa-mir-129-5p | NRIP2     |
| hsa-mir-129-5p | LONP2     |
| hsa-mir-129-5p | MIXL1     |
| hsa-mir-129-5p | KCTD10    |
| hsa-mir-129-5p | KREMEN1   |
| hsa-mir-129-5p | MAGT1     |
| hsa-mir-129-5p | CHCHD5    |
| hsa-mir-129-5p | YIPF4     |
| hsa-mir-129-5p | SLC25A33  |
| hsa-mir-129-5p | CCDC77    |
| hsa-mir-129-5p | LZIC      |
| hsa-mir-129-5p | NIFK      |
| hsa-mir-129-5p | HOOK3     |
| hsa-mir-129-5p | BRSK1     |
| hsa-mir-129-5p | ZBTB37    |
| hsa-mir-129-5p | NTNG2     |
| hsa-mir-129-5p | PRRC2B    |
| hsa-mir-129-5p | CNDP1     |
| hsa-mir-129-5p | NFKBID    |
| hsa-mir-129-5p | NFATC2IP  |
| hsa-mir-129-5p | SLC35B4   |
| hsa-mir-129-5p | MICALCL   |
| hsa-mir-129-5p | LSM10     |
| hsa-mir-129-5p | TMEM241   |
| hsa-mir-129-5p | HIST1H2AH |



|                |              |
|----------------|--------------|
| hsa-mir-129-5p | PAQR8        |
| hsa-mir-129-5p | STON2        |
| hsa-mir-129-5p | SELENO1      |
| hsa-mir-129-5p | SCIN         |
| hsa-mir-129-5p | CHRFAM7A     |
| hsa-mir-129-5p | KBTBD6       |
| hsa-mir-129-5p | KNSTRN       |
| hsa-mir-129-5p | ANGEL2       |
| hsa-mir-129-5p | BOD1         |
| hsa-mir-129-5p | ZNF502       |
| hsa-mir-129-5p | ANKRD44      |
| hsa-mir-129-5p | ZNF845       |
| hsa-mir-129-5p | DSEL         |
| hsa-mir-129-5p | ISPD         |
| hsa-mir-129-5p | SHISA9       |
| hsa-mir-129-5p | C16orf52     |
| hsa-mir-129-5p | C17orf99     |
| hsa-mir-129-5p | ERVMER34-1   |
| hsa-mir-129-5p | RNF103-CHMP3 |
| hsa-mir-129-5p | RBMXL1       |
| hsa-mir-129-5p | RNF165       |
| hsa-mir-129-5p | ARGFX        |
| hsa-mir-129-5p | C6orf132     |
| hsa-mir-129-5p | TEX22        |
| hsa-mir-129-5p | ZBTB8A       |
| hsa-mir-129-5p | NCF1         |
| hsa-mir-129-5p | CCDC169      |
| hsa-mir-129-5p | SLC35E2B     |
| hsa-mir-129-5p | GTF2H5       |
| hsa-mir-129-5p | TRIM72       |
| hsa-mir-212-3p | EIF2S3       |
| hsa-mir-212-3p | ACSL4        |
| hsa-mir-212-3p | ACHE         |
| hsa-mir-212-3p | ADCY1        |
| hsa-mir-212-3p | AMD1         |
| hsa-mir-212-3p | APBA1        |
| hsa-mir-212-3p | ART4         |
| hsa-mir-212-3p | BRCA1        |
| hsa-mir-212-3p | CCNA2        |
| hsa-mir-212-3p | CCNB1        |
| hsa-mir-212-3p | CDKN1A       |
| hsa-mir-212-3p | PLAGL2       |
| hsa-mir-212-3p | PSMA2        |
| hsa-mir-212-3p | GNB1         |

|                |          |
|----------------|----------|
| hsa-mir-212-3p | HOXC4    |
| hsa-mir-212-3p | HSPA1B   |
| hsa-mir-212-3p | KCNJ2    |
| hsa-mir-212-3p | KPNA1    |
| hsa-mir-212-3p | LDLR     |
| hsa-mir-212-3p | LIFR     |
| hsa-mir-212-3p | SMAD2    |
| hsa-mir-212-3p | MECP2    |
| hsa-mir-212-3p | MYC      |
| hsa-mir-212-3p | PFAS     |
| hsa-mir-212-3p | WT1      |
| hsa-mir-212-3p | ZNF711   |
| hsa-mir-212-3p | FXR1     |
| hsa-mir-212-3p | DPF1     |
| hsa-mir-212-3p | KDM5C    |
| hsa-mir-212-3p | FZD6     |
| hsa-mir-212-3p | PEA15    |
| hsa-mir-212-3p | SAP30    |
| hsa-mir-212-3p | USP8     |
| hsa-mir-212-3p | ABCG2    |
| hsa-mir-212-3p | DAZAP2   |
| hsa-mir-212-3p | HS3ST3B1 |
| hsa-mir-212-3p | STAG1    |
| hsa-mir-212-3p | CD226    |
| hsa-mir-212-3p | NUP50    |
| hsa-mir-212-3p | RAB18    |
| hsa-mir-212-3p | RRS1     |
| hsa-mir-212-3p | OTUD3    |
| hsa-mir-212-3p | CRTC1    |
| hsa-mir-212-3p | TSPAN12  |
| hsa-mir-212-3p | SGK3     |
| hsa-mir-212-3p | MTO1     |
| hsa-mir-212-3p | ASF1A    |
| hsa-mir-212-3p | AGO1     |
| hsa-mir-212-3p | EML4     |
| hsa-mir-212-3p | GMNN     |
| hsa-mir-212-3p | PHF20L1  |
| hsa-mir-212-3p | IER3IP1  |
| hsa-mir-212-3p | IRAK4    |
| hsa-mir-212-3p | PTCH1    |
| hsa-mir-212-3p | PXN      |
| hsa-mir-212-3p | RAB5B    |
| hsa-mir-212-3p | RB1      |
| hsa-mir-212-3p | RBP2     |

|                |          |
|----------------|----------|
| hsa-mir-212-3p | RFXAP    |
| hsa-mir-212-3p | SOD2     |
| hsa-mir-212-3p | SOX4     |
| hsa-mir-212-3p | SOX11    |
| hsa-mir-212-3p | ELOC     |
| hsa-mir-212-3p | TJP1     |
| hsa-mir-212-3p | CHAC1    |
| hsa-mir-212-3p | SH3TC2   |
| hsa-mir-212-3p | DCAF17   |
| hsa-mir-212-3p | SLC25A32 |
| hsa-mir-212-3p | VMP1     |
| hsa-mir-212-3p | CALN1    |
| hsa-mir-212-3p | SLC10A7  |
| hsa-mir-212-3p | HOOK3    |
| hsa-mir-212-3p | TJAP1    |
| hsa-mir-212-3p | ZNF280B  |
| hsa-mir-212-3p | TRUB1    |
| hsa-mir-212-3p | UBXN2A   |
| hsa-mir-212-3p | BMPER    |
| hsa-mir-212-3p | OLFML2A  |
| hsa-mir-212-3p | ARID2    |
| hsa-mir-212-3p | TWISTNB  |
| hsa-mir-212-3p | ZNF724   |
| hsa-mir-212-3p | CCDC169  |
| hsa-mir-212-3p | OCLN     |
| hsa-mir-212-3p | SETD5    |
| hsa-mir-212-3p | PARP11   |
| hsa-mir-212-3p | CYP20A1  |
| hsa-mir-212-3p | TNRC6C   |
| hsa-mir-212-3p | PRDM15   |
| hsa-mir-212-3p | C6orf106 |
| hsa-mir-212-3p | PRAMEF1  |
| hsa-mir-212-3p | GID4     |
| hsa-mir-212-3p | ALKBH4   |
| hsa-mir-212-3p | BRWD1    |
| hsa-mir-212-3p | SLC38A2  |
| hsa-mir-132-3p | GJE1     |
| hsa-mir-132-3p | CCDC169  |
| hsa-mir-132-3p | EOGT     |
| hsa-mir-132-3p | KRT6C    |
| hsa-mir-132-3p | COX8C    |
| hsa-mir-132-3p | KCTD4    |
| hsa-mir-132-3p | FAM221B  |
| hsa-mir-132-3p | ZNF724   |

|                |           |
|----------------|-----------|
| hsa-mir-132-3p | SYNDIG1L  |
| hsa-mir-132-3p | KRTAP4-11 |
| hsa-mir-132-3p | NCS1      |
| hsa-mir-132-3p | TSPAN12   |
| hsa-mir-132-3p | MTO1      |
| hsa-mir-132-3p | ASF1A     |
| hsa-mir-132-3p | FGF22     |
| hsa-mir-132-3p | B3GAT1    |
| hsa-mir-132-3p | AGO2      |
| hsa-mir-132-3p | EML4      |
| hsa-mir-132-3p | SEC61A1   |
| hsa-mir-132-3p | DMGDH     |
| hsa-mir-132-3p | MDFIC     |
| hsa-mir-132-3p | GMNN      |
| hsa-mir-132-3p | PHF20L1   |
| hsa-mir-132-3p | IER3IP1   |
| hsa-mir-132-3p | IRAK4     |
| hsa-mir-132-3p | JPT1      |
| hsa-mir-132-3p | ZDHHC2    |
| hsa-mir-132-3p | SNX7      |
| hsa-mir-132-3p | POLK      |
| hsa-mir-132-3p | HACD3     |
| hsa-mir-132-3p | CTDSPL2   |
| hsa-mir-132-3p | BRWD1     |
| hsa-mir-132-3p | SLC38A2   |
| hsa-mir-132-3p | CCSER2    |
| hsa-mir-132-3p | GNL3L     |
| hsa-mir-132-3p | ALKBH4    |
| hsa-mir-132-3p | MTMR10    |
| hsa-mir-132-3p | KLHL11    |
| hsa-mir-132-3p | VPS13D    |
| hsa-mir-132-3p | SETD5     |
| hsa-mir-132-3p | ETNK2     |
| hsa-mir-132-3p | YY1AP1    |
| hsa-mir-132-3p | UBE2W     |
| hsa-mir-132-3p | LGR4      |
| hsa-mir-132-3p | TRIM36    |
| hsa-mir-132-3p | SOX6      |
| hsa-mir-132-3p | DOCK10    |
| hsa-mir-132-3p | INTS8     |
| hsa-mir-132-3p | MUC13     |
| hsa-mir-132-3p | PARP11    |
| hsa-mir-132-3p | RTN4      |
| hsa-mir-132-3p | CYP20A1   |

|                |          |
|----------------|----------|
| hsa-mir-132-3p | TNRC6C   |
| hsa-mir-132-3p | PRX      |
| hsa-mir-132-3p | AASDHPPT |
| hsa-mir-132-3p | FKBP10   |
| hsa-mir-132-3p | PRDM15   |
| hsa-mir-132-3p | PRSS22   |
| hsa-mir-132-3p | SAMSN1   |
| hsa-mir-132-3p | C6orf106 |
| hsa-mir-132-3p | PRAMEF1  |
| hsa-mir-132-3p | C8orf33  |
| hsa-mir-132-3p | GID4     |
| hsa-mir-132-3p | CHAC1    |
| hsa-mir-132-3p | RNF128   |
| hsa-mir-132-3p | SH3TC2   |
| hsa-mir-132-3p | FAT4     |
| hsa-mir-132-3p | GSTCD    |
| hsa-mir-132-3p | DCAF17   |
| hsa-mir-132-3p | SLC25A32 |
| hsa-mir-132-3p | VMP1     |
| hsa-mir-132-3p | TMEM47   |
| hsa-mir-132-3p | TLN2     |
| hsa-mir-132-3p | CALN1    |
| hsa-mir-132-3p | SLC10A7  |
| hsa-mir-132-3p | HOOK3    |
| hsa-mir-132-3p | FBN3     |
| hsa-mir-132-3p | EBPL     |
| hsa-mir-132-3p | PARP10   |
| hsa-mir-132-3p | WNT3A    |
| hsa-mir-132-3p | EMILIN3  |
| hsa-mir-132-3p | DEPDC7   |
| hsa-mir-132-3p | ADAMTSL1 |
| hsa-mir-132-3p | TJAP1    |
| hsa-mir-132-3p | OSBPL8   |
| hsa-mir-132-3p | SFXN2    |
| hsa-mir-132-3p | FAT3     |
| hsa-mir-132-3p | ARL14EP  |
| hsa-mir-132-3p | CMTM3    |
| hsa-mir-132-3p | CST9L    |
| hsa-mir-132-3p | FAM199X  |
| hsa-mir-132-3p | MUC17    |
| hsa-mir-132-3p | ZNF280B  |
| hsa-mir-132-3p | TRUB1    |
| hsa-mir-132-3p | KBTBD3   |
| hsa-mir-132-3p | FAM81A   |

|                |          |
|----------------|----------|
| hsa-mir-132-3p | ANKRD29  |
| hsa-mir-132-3p | ARL6IP6  |
| hsa-mir-132-3p | SYNE3    |
| hsa-mir-132-3p | SPRED1   |
| hsa-mir-132-3p | UBXN2A   |
| hsa-mir-132-3p | LCA5     |
| hsa-mir-132-3p | BMPER    |
| hsa-mir-132-3p | OLFML2A  |
| hsa-mir-132-3p | ARID2    |
| hsa-mir-132-3p | CC2D1B   |
| hsa-mir-132-3p | ARL13B   |
| hsa-mir-132-3p | ADGRF4   |
| hsa-mir-132-3p | TWISTNB  |
| hsa-mir-132-3p | SYT14    |
| hsa-mir-132-3p | ADH1A    |
| hsa-mir-132-3p | ALK      |
| hsa-mir-132-3p | AMD1     |
| hsa-mir-132-3p | ANXA2    |
| hsa-mir-132-3p | APBA1    |
| hsa-mir-132-3p | TRIM23   |
| hsa-mir-132-3p | ARF6     |
| hsa-mir-132-3p | ARR3     |
| hsa-mir-132-3p | ART4     |
| hsa-mir-132-3p | TNFRSF17 |
| hsa-mir-132-3p | BDNF     |
| hsa-mir-132-3p | BNIP2    |
| hsa-mir-132-3p | CA1      |
| hsa-mir-132-3p | CALU     |
| hsa-mir-132-3p | CASP7    |
| hsa-mir-132-3p | CCNA2    |
| hsa-mir-132-3p | CCNB1    |
| hsa-mir-132-3p | CDH3     |
| hsa-mir-132-3p | CDKN1A   |
| hsa-mir-132-3p | CFTR     |
| hsa-mir-132-3p | CHRNA5   |
| hsa-mir-132-3p | CR2      |
| hsa-mir-132-3p | CRK      |
| hsa-mir-132-3p | CSTF3    |
| hsa-mir-132-3p | CYP2E1   |
| hsa-mir-132-3p | CYP26A1  |
| hsa-mir-132-3p | CD55     |
| hsa-mir-132-3p | HBEGF    |
| hsa-mir-132-3p | ECT2     |
| hsa-mir-132-3p | EGFR     |

|                |          |
|----------------|----------|
| hsa-mir-132-3p | EIF2S3   |
| hsa-mir-132-3p | EPHA4    |
| hsa-mir-132-3p | EYA4     |
| hsa-mir-132-3p | FABP7    |
| hsa-mir-132-3p | ACSL4    |
| hsa-mir-132-3p | FGF2     |
| hsa-mir-132-3p | FOXO1    |
| hsa-mir-132-3p | FUT1     |
| hsa-mir-132-3p | GATA3    |
| hsa-mir-132-3p | NIPSNAP2 |
| hsa-mir-132-3p | GCNT1    |
| hsa-mir-132-3p | GK       |
| hsa-mir-132-3p | GNB1     |
| hsa-mir-132-3p | GTF2H1   |
| hsa-mir-132-3p | HOXC4    |
| hsa-mir-132-3p | HSPA1B   |
| hsa-mir-132-3p | IMPA1    |
| hsa-mir-132-3p | IRAK1    |
| hsa-mir-132-3p | KCNJ9    |
| hsa-mir-132-3p | KIR3DL1  |
| hsa-mir-132-3p | KIR3DL2  |
| hsa-mir-132-3p | KPNA1    |
| hsa-mir-132-3p | RPSA     |
| hsa-mir-132-3p | STMN1    |
| hsa-mir-132-3p | LDLR     |
| hsa-mir-132-3p | LFNG     |
| hsa-mir-132-3p | LIFR     |
| hsa-mir-132-3p | LIG4     |
| hsa-mir-132-3p | LOXL1    |
| hsa-mir-132-3p | SMAD2    |
| hsa-mir-132-3p | MAP1B    |
| hsa-mir-132-3p | MEF2A    |
| hsa-mir-132-3p | MAP3K3   |
| hsa-mir-132-3p | MMP9     |
| hsa-mir-132-3p | MMP13    |
| hsa-mir-132-3p | NAP1L1   |
| hsa-mir-132-3p | NBN      |
| hsa-mir-132-3p | NDUFB10  |
| hsa-mir-132-3p | OAS2     |
| hsa-mir-132-3p | PFAS     |
| hsa-mir-132-3p | PLAGL2   |
| hsa-mir-132-3p | PLSCR1   |
| hsa-mir-132-3p | MAPK1    |
| hsa-mir-132-3p | PSMA2    |

|                |          |
|----------------|----------|
| hsa-mir-132-3p | PSMD12   |
| hsa-mir-132-3p | PTGS2    |
| hsa-mir-132-3p | RAB5B    |
| hsa-mir-132-3p | RAF1     |
| hsa-mir-132-3p | RASA1    |
| hsa-mir-132-3p | RB1      |
| hsa-mir-132-3p | RPL7     |
| hsa-mir-132-3p | RPS5     |
| hsa-mir-132-3p | S100A1   |
| hsa-mir-132-3p | SDF2     |
| hsa-mir-132-3p | SH3BGRL  |
| hsa-mir-132-3p | SLC2A1   |
| hsa-mir-132-3p | SMN1     |
| hsa-mir-132-3p | SOX4     |
| hsa-mir-132-3p | SOX5     |
| hsa-mir-132-3p | SPAST    |
| hsa-mir-132-3p | SSR3     |
| hsa-mir-132-3p | STAU1    |
| hsa-mir-132-3p | ELOC     |
| hsa-mir-132-3p | TFPI     |
| hsa-mir-132-3p | THBS1    |
| hsa-mir-132-3p | TSPAN6   |
| hsa-mir-132-3p | VDAC2    |
| hsa-mir-132-3p | ZNF711   |
| hsa-mir-132-3p | ZNF148   |
| hsa-mir-132-3p | ZNF236   |
| hsa-mir-132-3p | MLLT10   |
| hsa-mir-132-3p | FXR1     |
| hsa-mir-132-3p | TAF15    |
| hsa-mir-132-3p | GDF5     |
| hsa-mir-132-3p | KDM5C    |
| hsa-mir-132-3p | FZD6     |
| hsa-mir-132-3p | PIP5K1A  |
| hsa-mir-132-3p | PIK3R3   |
| hsa-mir-132-3p | CNTNAP1  |
| hsa-mir-132-3p | PLA2G4C  |
| hsa-mir-132-3p | CD164    |
| hsa-mir-132-3p | ATP6V0E1 |
| hsa-mir-132-3p | USP8     |
| hsa-mir-132-3p | PDLIM7   |
| hsa-mir-132-3p | ARHGAP32 |
| hsa-mir-132-3p | DAZAP2   |
| hsa-mir-132-3p | HS3ST3B1 |
| hsa-mir-132-3p | NR1D2    |



|                 |                |
|-----------------|----------------|
| hsa-mir-132-3p  | ACTR2          |
| hsa-mir-132-3p  | FRY            |
| hsa-mir-132-3p  | SPRY1          |
| hsa-mir-132-3p  | STAG1          |
| hsa-mir-132-3p  | RACK1          |
| hsa-mir-132-3p  | EXOC5          |
| hsa-mir-132-3p  | YKT6           |
| hsa-mir-132-3p  | CD226          |
| hsa-mir-132-3p  | CHL1           |
| hsa-mir-132-3p  | NUP50          |
| hsa-mir-132-3p  | NCKAP1         |
| hsa-mir-132-3p  | PLPBP          |
| hsa-mir-132-3p  | TUSC2          |
| hsa-mir-132-3p  | ZNF652         |
| hsa-mir-132-3p  | RAB18          |
| hsa-mir-132-3p  | TBC1D9         |
| hsa-mir-132-3p  | RRS1           |
| hsa-mir-132-3p  | FBXO28         |
| hsa-mir-132-3p  | ANKRD28        |
| hsa-mir-132-3p  | OTUD3          |
| hsa-mir-132-3p  | CAMSAP2        |
| hsa-mir-132-3p  | CSTF2T         |
| hsa-mir-132-3p  | SMCHD1         |
| hsa-mir-132-3p  | CRTC1          |
| hsa-mir-132-3p  | SIRT1          |
| hsa-mir-132-3p  | OCLN           |
| hsa-mir-132-3p  | RTEL1-TNFRSF6B |
| hsa-mir-376c-3p | DFFA           |
| hsa-mir-376c-3p | TIMM8A         |
| hsa-mir-376c-3p | CENPA          |
| hsa-mir-376c-3p | DAPK1          |
| hsa-mir-376c-3p | GRB2           |
| hsa-mir-376c-3p | IGF1R          |
| hsa-mir-376c-3p | MC2R           |
| hsa-mir-376c-3p | MDM2           |
| hsa-mir-376c-3p | ORC4           |
| hsa-mir-376c-3p | PDPK1          |
| hsa-mir-376c-3p | CDK14          |
| hsa-mir-376c-3p | PRKCH          |
| hsa-mir-376c-3p | RAB1A          |
| hsa-mir-376c-3p | SIAH2          |
| hsa-mir-376c-3p | SKIL           |
| hsa-mir-376c-3p | ELF4           |
| hsa-mir-376c-3p | NR5A2          |

|                 |           |
|-----------------|-----------|
| hsa-mir-376c-3p | TAT       |
| hsa-mir-376c-3p | TGFA      |
| hsa-mir-376c-3p | TGFBR1    |
| hsa-mir-376c-3p | TSPAN6    |
| hsa-mir-376c-3p | UBE2D3    |
| hsa-mir-376c-3p | UGT2B15   |
| hsa-mir-376c-3p | UGT2B17   |
| hsa-mir-376c-3p | VLDLR     |
| hsa-mir-376c-3p | WNT10B    |
| hsa-mir-376c-3p | FZD6      |
| hsa-mir-376c-3p | CBX4      |
| hsa-mir-376c-3p | SNCB      |
| hsa-mir-376c-3p | SP4       |
| hsa-mir-376c-3p | RPS6KA5   |
| hsa-mir-376c-3p | FXR2      |
| hsa-mir-376c-3p | MORF4L2   |
| hsa-mir-376c-3p | BZW1      |
| hsa-mir-376c-3p | SECISBP2L |
| hsa-mir-376c-3p | JADE3     |
| hsa-mir-376c-3p | G3BP1     |
| hsa-mir-376c-3p | ENOX2     |
| hsa-mir-376c-3p | FRS2      |
| hsa-mir-376c-3p | SNRNP27   |
| hsa-mir-376c-3p | CHEK2     |
| hsa-mir-376c-3p | FOXJ3     |
| hsa-mir-376c-3p | NEDD4L    |
| hsa-mir-376c-3p | SYF2      |
| hsa-mir-376c-3p | LSM14A    |
| hsa-mir-376c-3p | FAM8A1    |
| hsa-mir-376c-3p | BCL11A    |
| hsa-mir-376c-3p | TMEM106B  |
| hsa-mir-376c-3p | FNBP1L    |
| hsa-mir-376c-3p | YTHDF1    |
| hsa-mir-376c-3p | PSPC1     |
| hsa-mir-376c-3p | ERO1B     |
| hsa-mir-376c-3p | RTN4      |
| hsa-mir-376c-3p | ZNFX1     |
| hsa-mir-376c-3p | ENPP5     |
| hsa-mir-376c-3p | PRRG3     |
| hsa-mir-376c-3p | METTTL22  |
| hsa-mir-376c-3p | ATAT1     |
| hsa-mir-376c-3p | DNAJB14   |
| hsa-mir-376c-3p | CYTOR     |
| hsa-mir-376c-3p | ACVR1C    |

|                 |           |
|-----------------|-----------|
| hsa-mir-376c-3p | ARHGAP42  |
| hsa-mir-376c-3p | TVP23C    |
| hsa-mir-376c-3p | PRPS1L1   |
| hsa-mir-376c-3p | RBM20     |
| hsa-mir-376c-3p | ZNF829    |
| hsa-mir-376c-3p | ANKRD36   |
| hsa-mir-376c-3p | GOLGA7B   |
| hsa-mir-376c-3p | TNFRSF10B |
| hsa-mir-376c-3p | CLDN1     |
| hsa-mir-376c-3p | MTRNR2L2  |
| hsa-mir-376c-3p | MTRNR2L6  |
| hsa-mir-376c-3p | MTRNR2L8  |
| hsa-mir-376c-3p | ATM       |
| hsa-mir-376c-3p | BBS4      |
| hsa-mir-376c-3p | BCL2      |
| hsa-mir-376c-3p | BMI1      |
| hsa-mir-376c-3p | RUNX2     |
| hsa-mir-376c-3p | CD59      |
| hsa-mir-376c-3p | MTRNR2L1  |
| hsa-mir-376c-3p | ADH4      |
| hsa-mir-376c-3p | ANK1      |
| hsa-mir-376c-3p | TMEM170B  |
| hsa-mir-376c-3p | ARF6      |
| hsa-mir-383-5p  | CAPN6     |
| hsa-mir-383-5p  | DIO1      |
| hsa-mir-383-5p  | GAS1      |
| hsa-mir-383-5p  | IRF1      |
| hsa-mir-383-5p  | KCNJ12    |
| hsa-mir-383-5p  | LDHA      |
| hsa-mir-383-5p  | NPAT      |
| hsa-mir-383-5p  | SLC11A2   |
| hsa-mir-383-5p  | NRF1      |
| hsa-mir-383-5p  | PLCG2     |
| hsa-mir-383-5p  | PPP1R10   |
| hsa-mir-383-5p  | GATA6     |
| hsa-mir-383-5p  | GLUL      |
| hsa-mir-383-5p  | MSH6      |
| hsa-mir-383-5p  | HNRNPH1   |
| hsa-mir-383-5p  | IGF1R     |
| hsa-mir-383-5p  | SRSF2     |
| hsa-mir-383-5p  | TAF13     |
| hsa-mir-383-5p  | TPM3      |
| hsa-mir-383-5p  | TRAF5     |
| hsa-mir-383-5p  | TSN       |

|                |           |
|----------------|-----------|
| hsa-mir-383-5p | VCP       |
| hsa-mir-383-5p | VEGFA     |
| hsa-mir-383-5p | ZFP37     |
| hsa-mir-383-5p | TWF1      |
| hsa-mir-383-5p | RAD21     |
| hsa-mir-383-5p | RHD       |
| hsa-mir-383-5p | RPL41     |
| hsa-mir-383-5p | SFPQ      |
| hsa-mir-383-5p | ADSS      |
| hsa-mir-383-5p | AHR       |
| hsa-mir-383-5p | ALDH1B1   |
| hsa-mir-383-5p | ATP5G3    |
| hsa-mir-383-5p | ATR       |
| hsa-mir-383-5p | CCND1     |
| hsa-mir-383-5p | MED16     |
| hsa-mir-383-5p | SMC2      |
| hsa-mir-383-5p | NCKAP1    |
| hsa-mir-383-5p | ZNF460    |
| hsa-mir-383-5p | PRDX3     |
| hsa-mir-383-5p | CHEK2     |
| hsa-mir-383-5p | SYNRG     |
| hsa-mir-383-5p | CEP162    |
| hsa-mir-383-5p | CLUAP1    |
| hsa-mir-383-5p | GGA2      |
| hsa-mir-383-5p | WBP2      |
| hsa-mir-383-5p | HEBP2     |
| hsa-mir-383-5p | GABARAPL1 |
| hsa-mir-383-5p | APOL2     |
| hsa-mir-383-5p | MOB4      |
| hsa-mir-383-5p | CLIC4     |
| hsa-mir-383-5p | ZBTB20    |
| hsa-mir-383-5p | FBXW8     |
| hsa-mir-383-5p | PCDH11X   |
| hsa-mir-383-5p | TMOD3     |
| hsa-mir-383-5p | ZBTB21    |
| hsa-mir-383-5p | MRNIP     |
| hsa-mir-383-5p | WAC       |
| hsa-mir-383-5p | SUCO      |
| hsa-mir-383-5p | CTDSPL2   |
| hsa-mir-383-5p | TRMT112   |
| hsa-mir-383-5p | NCKIPSD   |
| hsa-mir-383-5p | CLIC6     |
| hsa-mir-383-5p | RBM27     |
| hsa-mir-383-5p | DDIT4     |

|                |            |
|----------------|------------|
| hsa-mir-383-5p | WDR5B      |
| hsa-mir-383-5p | TRPM7      |
| hsa-mir-383-5p | FNBP1L     |
| hsa-mir-383-5p | C5orf22    |
| hsa-mir-383-5p | YOD1       |
| hsa-mir-383-5p | TMEM30A    |
| hsa-mir-383-5p | CENPN      |
| hsa-mir-383-5p | SLC22A23   |
| hsa-mir-383-5p | CRTC3      |
| hsa-mir-383-5p | RSG1       |
| hsa-mir-383-5p | SH3TC2     |
| hsa-mir-383-5p | PCNX2      |
| hsa-mir-383-5p | KLHL15     |
| hsa-mir-383-5p | GDPD5      |
| hsa-mir-383-5p | PCDH11Y    |
| hsa-mir-383-5p | ATG10      |
| hsa-mir-383-5p | GTPBP3     |
| hsa-mir-383-5p | UNC119B    |
| hsa-mir-383-5p | ZIC5       |
| hsa-mir-383-5p | ANKRD44    |
| hsa-mir-383-5p | DSEL       |
| hsa-mir-383-5p | SCAMP4     |
| hsa-mir-383-5p | SGK494     |
| hsa-mir-383-5p | TRIM71     |
| hsa-mir-383-5p | TMEM199    |
| hsa-mir-383-5p | DIRAS1     |
| hsa-mir-383-5p | RIMBP3C    |
| hsa-mir-383-5p | CREBRF     |
| hsa-mir-383-5p | UBN2       |
| hsa-mir-383-5p | ZDHHC24    |
| hsa-mir-383-5p | PLA2G4D    |
| hsa-mir-383-5p | ZNF699     |
| hsa-mir-383-5p | PEAR1      |
| hsa-mir-383-5p | PICSAR     |
| hsa-mir-383-5p | MICA       |
| hsa-mir-383-5p | HSPE1-MOB4 |
| hsa-mir-383-5p | KIAA0100   |
| hsa-mir-383-5p | SLC35E2    |
| hsa-mir-383-5p | EDF1       |
| hsa-mir-383-5p | TNFSF13    |
| hsa-mir-383-5p | ZMYM2      |
| hsa-mir-383-5p | DYRK2      |
| hsa-mir-383-5p | GOSR1      |
| hsa-mir-383-5p | TMEM59     |

|                |          |
|----------------|----------|
| hsa-mir-383-5p | DDX21    |
| hsa-mir-383-5p | GRAP2    |
| hsa-mir-383-5p | IER2     |
| hsa-mir-505-3p | OGFR     |
| hsa-mir-505-3p | ZNF652   |
| hsa-mir-505-3p | SUB1     |
| hsa-mir-505-3p | EBNA1BP2 |
| hsa-mir-505-3p | LSM4     |
| hsa-mir-505-3p | PTCD1    |
| hsa-mir-505-3p | PLEKHG3  |
| hsa-mir-505-3p | GIGYF2   |
| hsa-mir-505-3p | SERBP1   |
| hsa-mir-505-3p | INTU     |
| hsa-mir-505-3p | KCNMB4   |
| hsa-mir-505-3p | DROSHA   |
| hsa-mir-505-3p | TMOD3    |
| hsa-mir-505-3p | FAHD2A   |
| hsa-mir-505-3p | FIS1     |
| hsa-mir-505-3p | RSRC1    |
| hsa-mir-505-3p | ASB1     |
| hsa-mir-505-3p | IL20RB   |
| hsa-mir-505-3p | TREM1    |
| hsa-mir-505-3p | PUS7     |
| hsa-mir-505-3p | GNL3L    |
| hsa-mir-505-3p | KLHDC4   |
| hsa-mir-505-3p | FNBP1L   |
| hsa-mir-505-3p | CWC25    |
| hsa-mir-505-3p | YTHDF1   |
| hsa-mir-505-3p | ATG2B    |
| hsa-mir-505-3p | RBM28    |
| hsa-mir-505-3p | MAP1S    |
| hsa-mir-505-3p | FANCI    |
| hsa-mir-505-3p | MAML3    |
| hsa-mir-505-3p | OTUD5    |
| hsa-mir-505-3p | ZFP64    |
| hsa-mir-505-3p | CBWD1    |
| hsa-mir-505-3p | BAHD1    |
| hsa-mir-505-3p | RUFY3    |
| hsa-mir-505-3p | DIP2C    |
| hsa-mir-505-3p | RRP1B    |
| hsa-mir-505-3p | GRAMD4   |
| hsa-mir-505-3p | CLUH     |
| hsa-mir-505-3p | BICD2    |
| hsa-mir-505-3p | PPP1R13B |

|                |          |
|----------------|----------|
| hsa-mir-505-3p | ACAP2    |
| hsa-mir-505-3p | BACE1    |
| hsa-mir-505-3p | PISD     |
| hsa-mir-505-3p | PSMD10   |
| hsa-mir-505-3p | PTPRJ    |
| hsa-mir-505-3p | REST     |
| hsa-mir-505-3p | RGS2     |
| hsa-mir-505-3p | RPL9     |
| hsa-mir-505-3p | RPLP0    |
| hsa-mir-505-3p | RPS15    |
| hsa-mir-505-3p | SALL1    |
| hsa-mir-505-3p | SCD      |
| hsa-mir-505-3p | SEC13    |
| hsa-mir-505-3p | SRSF1    |
| hsa-mir-505-3p | SOD2     |
| hsa-mir-505-3p | SOX11    |
| hsa-mir-505-3p | SYT4     |
| hsa-mir-505-3p | TAF9     |
| hsa-mir-505-3p | TCF7L2   |
| hsa-mir-505-3p | TGFA     |
| hsa-mir-505-3p | TGFBR2   |
| hsa-mir-505-3p | THOP1    |
| hsa-mir-505-3p | TLE3     |
| hsa-mir-505-3p | TNFAIP3  |
| hsa-mir-505-3p | TP53BP1  |
| hsa-mir-505-3p | TPBG     |
| hsa-mir-505-3p | TPD52    |
| hsa-mir-505-3p | TUBB2A   |
| hsa-mir-505-3p | TXNRD1   |
| hsa-mir-505-3p | UBE2D3   |
| hsa-mir-505-3p | UQCRRS1  |
| hsa-mir-505-3p | UTRN     |
| hsa-mir-505-3p | VBP1     |
| hsa-mir-505-3p | ZNF208   |
| hsa-mir-505-3p | FZD5     |
| hsa-mir-505-3p | DGS2     |
| hsa-mir-505-3p | HIST1H4D |
| hsa-mir-505-3p | LTBP4    |
| hsa-mir-505-3p | NCK2     |
| hsa-mir-505-3p | IRS4     |
| hsa-mir-505-3p | SLC25A12 |
| hsa-mir-505-3p | RTL8C    |
| hsa-mir-505-3p | BTRC     |
| hsa-mir-505-3p | BTAF1    |

|                |         |
|----------------|---------|
| hsa-mir-505-3p | PRC1    |
| hsa-mir-505-3p | MTA2    |
| hsa-mir-505-3p | SNAP29  |
| hsa-mir-505-3p | MORF4L2 |
| hsa-mir-505-3p | SOCS5   |
| hsa-mir-505-3p | MDC1    |
| hsa-mir-505-3p | PDE4DIP |
| hsa-mir-505-3p | KDM4A   |
| hsa-mir-505-3p | BMS1    |
| hsa-mir-505-3p | PJA2    |
| hsa-mir-505-3p | TLK1    |
| hsa-mir-505-3p | TRIM28  |
| hsa-mir-505-3p | ALYREF  |
| hsa-mir-505-3p | TUBB3   |
| hsa-mir-505-3p | NDRG1   |
| hsa-mir-505-3p | ZBTB18  |
| hsa-mir-505-3p | HMGNA4  |
| hsa-mir-505-3p | TM9SF1  |
| hsa-mir-505-3p | CCT7    |
| hsa-mir-505-3p | PAICS   |
| hsa-mir-505-3p | STAMBP  |
| hsa-mir-505-3p | SPINT2  |
| hsa-mir-505-3p | DMRT2   |
| hsa-mir-505-3p | CD226   |
| hsa-mir-505-3p | PNMA2   |
| hsa-mir-505-3p | GRK3    |
| hsa-mir-505-3p | AMFR    |
| hsa-mir-505-3p | XIAP    |
| hsa-mir-505-3p | RHOH    |
| hsa-mir-505-3p | BMP2    |
| hsa-mir-505-3p | CANX    |
| hsa-mir-505-3p | CCND2   |
| hsa-mir-505-3p | CD47    |
| hsa-mir-505-3p | CDC5L   |
| hsa-mir-505-3p | CHEK1   |
| hsa-mir-505-3p | COL4A1  |
| hsa-mir-505-3p | CSE1L   |
| hsa-mir-505-3p | CSF1    |
| hsa-mir-505-3p | CSNK1A1 |
| hsa-mir-505-3p | CTSZ    |
| hsa-mir-505-3p | DDX3X   |
| hsa-mir-505-3p | DDX6    |
| hsa-mir-505-3p | DHX9    |
| hsa-mir-505-3p | TSC22D3 |



|                |          |
|----------------|----------|
| hsa-mir-505-3p | EEF1A1   |
| hsa-mir-505-3p | EIF1AX   |
| hsa-mir-505-3p | ELF4     |
| hsa-mir-505-3p | ELK3     |
| hsa-mir-505-3p | EPHA4    |
| hsa-mir-505-3p | FANCD2   |
| hsa-mir-505-3p | XRCC6    |
| hsa-mir-505-3p | GAS1     |
| hsa-mir-505-3p | GGCX     |
| hsa-mir-505-3p | GPLD1    |
| hsa-mir-505-3p | H3F3B    |
| hsa-mir-505-3p | HDLBP    |
| hsa-mir-505-3p | HNRNPF   |
| hsa-mir-505-3p | HOXA9    |
| hsa-mir-505-3p | HSPA1B   |
| hsa-mir-505-3p | ID4      |
| hsa-mir-505-3p | IGF1     |
| hsa-mir-505-3p | EIF6     |
| hsa-mir-505-3p | JARID2   |
| hsa-mir-505-3p | KCNH1    |
| hsa-mir-505-3p | TNPO1    |
| hsa-mir-505-3p | LGALS8   |
| hsa-mir-505-3p | LIMS1    |
| hsa-mir-505-3p | SMAD2    |
| hsa-mir-505-3p | MAZ      |
| hsa-mir-505-3p | DNAJB9   |
| hsa-mir-505-3p | MKI67    |
| hsa-mir-505-3p | MYBPC1   |
| hsa-mir-505-3p | MYBL2    |
| hsa-mir-505-3p | MYH10    |
| hsa-mir-505-3p | NPTX1    |
| hsa-mir-505-3p | ORC2     |
| hsa-mir-505-3p | OSBP     |
| hsa-mir-505-3p | POLG     |
| hsa-mir-505-3p | POLR2D   |
| hsa-mir-505-3p | PPP1CB   |
| hsa-mir-505-3p | PRKCA    |
| hsa-mir-505-3p | MYO19    |
| hsa-mir-505-3p | EDEM3    |
| hsa-mir-505-3p | TET1     |
| hsa-mir-505-3p | VMP1     |
| hsa-mir-505-3p | TMEM185A |
| hsa-mir-505-3p | PRRC2B   |
| hsa-mir-505-3p | FUT10    |

|                |          |
|----------------|----------|
| hsa-mir-505-3p | MICALCL  |
| hsa-mir-505-3p | TRIM4    |
| hsa-mir-505-3p | KBTBD6   |
| hsa-mir-505-3p | MCFD2    |
| hsa-mir-505-3p | ZNF845   |
| hsa-mir-505-3p | TMEM132B |
| hsa-mir-505-3p | ZNF511   |
| hsa-mir-505-3p | ANKRD13B |
| hsa-mir-505-3p | GJD3     |
| hsa-mir-505-3p | TPRG1L   |
| hsa-mir-505-3p | TYW5     |
| hsa-mir-505-3p | NUDT16   |
| hsa-mir-505-3p | RIMS4    |
| hsa-mir-505-3p | TMEM37   |
| hsa-mir-505-3p | SRXN1    |
| hsa-mir-505-3p | FBXL16   |
| hsa-mir-505-3p | SLC5A12  |
| hsa-mir-505-3p | DGKH     |
| hsa-mir-505-3p | PRICKLE2 |
| hsa-mir-505-3p | FUT11    |
| hsa-mir-505-3p | TUBB     |
| hsa-mir-505-3p | CBWD5    |
| hsa-mir-505-3p | HNRNPA3  |
| hsa-mir-505-3p | OPN5     |
| hsa-mir-505-3p | ZBTB9    |
| hsa-mir-505-3p | FBXO33   |
| hsa-mir-505-3p | NEGR1    |
| hsa-mir-505-3p | C5orf64  |
| hsa-mir-505-3p | ANKRD13D |
| hsa-mir-505-3p | ACER2    |
| hsa-mir-505-3p | ZNF445   |
| hsa-mir-505-3p | FAM89A   |
| hsa-mir-505-3p | GJB7     |
| hsa-mir-505-3p | SOGA3    |
| hsa-mir-505-3p | BEND4    |
| hsa-mir-505-3p | HIST2H4B |
| hsa-mir-505-3p | NBPF8    |
| hsa-mir-505-3p | CASTOR2  |
| hsa-mir-505-3p | PET117   |
| hsa-mir-505-3p | TNRC6C   |
| hsa-mir-505-3p | FAM160B1 |
| hsa-mir-505-3p | THADA    |
| hsa-mir-505-3p | UBE2O    |
| hsa-mir-505-3p | NUCKS1   |

|                |          |
|----------------|----------|
| hsa-mir-505-3p | YTHDC2   |
| hsa-mir-505-3p | GID4     |
| hsa-mir-505-3p | NABP2    |
| hsa-mir-505-3p | QSER1    |
| hsa-mir-505-3p | C15orf39 |
| hsa-mir-505-3p | PRDM10   |
| hsa-mir-421    | ZFP36L2  |
| hsa-mir-421    | CASP2    |
| hsa-mir-421    | GRK3     |
| hsa-mir-421    | AP1G1    |
| hsa-mir-421    | SLC25A6  |
| hsa-mir-421    | XIAP     |
| hsa-mir-421    | RHOB     |
| hsa-mir-421    | RND3     |
| hsa-mir-421    | RHOH     |
| hsa-mir-421    | ATM      |
| hsa-mir-421    | ATP6V0C  |
| hsa-mir-421    | DUSP3    |
| hsa-mir-421    | E2F6     |
| hsa-mir-421    | CASP3    |
| hsa-mir-421    | CDH1     |
| hsa-mir-421    | CEBPB    |
| hsa-mir-421    | CEBPD    |
| hsa-mir-421    | COL4A1   |
| hsa-mir-421    | COPA     |
| hsa-mir-421    | CSE1L    |
| hsa-mir-421    | CSNK1A1  |
| hsa-mir-421    | DDX3X    |
| hsa-mir-421    | DFFB     |
| hsa-mir-421    | TSC22D3  |
| hsa-mir-421    | HTT      |
| hsa-mir-421    | HOXA9    |
| hsa-mir-421    | HSP90AA1 |
| hsa-mir-421    | ID4      |
| hsa-mir-421    | IGF1     |
| hsa-mir-421    | INPP4A   |
| hsa-mir-421    | ITPK1    |
| hsa-mir-421    | JARID2   |
| hsa-mir-421    | KCNN3    |
| hsa-mir-421    | LBR      |
| hsa-mir-421    | LIMS1    |
| hsa-mir-421    | SMAD4    |
| hsa-mir-421    | MAZ      |
| hsa-mir-421    | CD46     |

|             |         |
|-------------|---------|
| hsa-mir-421 | FOXO4   |
| hsa-mir-421 | MTAP    |
| hsa-mir-421 | MYBPC1  |
| hsa-mir-421 |         |
| hsa-mir-421 | NFE2L1  |
| hsa-mir-421 | NPM1    |
| hsa-mir-421 | NPTX1   |
| hsa-mir-421 | PDPK1   |
| hsa-mir-421 | PHKA1   |
| hsa-mir-421 | POLG    |
| hsa-mir-421 | POLR2D  |
| hsa-mir-421 | PPP2CB  |
| hsa-mir-421 | PRCC    |
| hsa-mir-421 | MAPK8   |
| hsa-mir-421 | PSME1   |
| hsa-mir-421 | EEF1A1  |
| hsa-mir-421 | EIF4A1  |
| hsa-mir-421 | EIF4G2  |
| hsa-mir-421 | FAT2    |
| hsa-mir-421 | GALK2   |
| hsa-mir-421 | GAS1    |
| hsa-mir-421 | NR6A1   |
| hsa-mir-421 | GCSH    |
| hsa-mir-421 | GRK6    |
| hsa-mir-421 | NR3C1   |
| hsa-mir-421 | HADHA   |
| hsa-mir-421 | VMP1    |
| hsa-mir-421 | FAM172A |
| hsa-mir-421 | PARP10  |
| hsa-mir-421 | RAB2B   |
| hsa-mir-421 | TRIM4   |
| hsa-mir-421 | ZNF30   |
| hsa-mir-421 | MCFD2   |
| hsa-mir-421 | RASL10B |
| hsa-mir-421 | NXPE3   |
| hsa-mir-421 | ASB16   |
| hsa-mir-421 | SFXN1   |
| hsa-mir-421 | PAXBP1  |
| hsa-mir-421 | FAM122A |
| hsa-mir-421 | GJD3    |
| hsa-mir-421 | TPRG1L  |
| hsa-mir-421 | FAM168B |
| hsa-mir-421 | RIMS4   |
| hsa-mir-421 | TMEM37  |

2-Sep

|             |          |
|-------------|----------|
| hsa-mir-421 | FBXL16   |
| hsa-mir-421 | GAREM2   |
| hsa-mir-421 | CREBRF   |
| hsa-mir-421 | PPTC7    |
| hsa-mir-421 | DGKH     |
| hsa-mir-421 | PRICKLE2 |
| hsa-mir-421 | OTUD1    |
| hsa-mir-421 | CBWD5    |
| hsa-mir-421 | NEGR1    |
| hsa-mir-421 | SREK1IP1 |
| hsa-mir-421 | RGMB     |
| hsa-mir-421 | ZNF678   |
| hsa-mir-421 | CCDC39   |
| hsa-mir-421 | FAM89A   |
| hsa-mir-421 | GJB7     |
| hsa-mir-421 | C5orf46  |
| hsa-mir-421 | RBMXL1   |
| hsa-mir-421 | HIST2H4B |
| hsa-mir-421 | NBPF8    |
| hsa-mir-421 | CASTOR2  |
| hsa-mir-421 | DDX20    |
| hsa-mir-421 | ATXN2L   |
| hsa-mir-421 | ZNF652   |
| hsa-mir-421 | MLXIP    |
| hsa-mir-421 | BAHD1    |
| hsa-mir-421 | CNOT1    |
| hsa-mir-421 | PHLPP2   |
| hsa-mir-421 | NCDN     |
| hsa-mir-421 | RHOBTB2  |
| hsa-mir-421 | ZC3H7B   |
| hsa-mir-421 | DNAJC16  |
| hsa-mir-421 | SMCHD1   |
| hsa-mir-421 | PPP1R13B |
| hsa-mir-421 | SPECC1L  |
| hsa-mir-421 | LARS2    |
| hsa-mir-421 | SIRT3    |
| hsa-mir-421 | CBX7     |
| hsa-mir-421 | ACOT9    |
| hsa-mir-421 | ZMYND8   |
| hsa-mir-421 | BACE1    |
| hsa-mir-421 | FKBP8    |
| hsa-mir-421 | LSM4     |
| hsa-mir-421 | NIPBL    |
| hsa-mir-421 | RAB26    |

|             |          |
|-------------|----------|
| hsa-mir-421 | NSL1     |
| hsa-mir-421 | FAM32A   |
| hsa-mir-421 | AGO1     |
| hsa-mir-421 | FAM155B  |
| hsa-mir-421 | AFF4     |
| hsa-mir-421 | INTU     |
| hsa-mir-421 | EIF3K    |
| hsa-mir-421 | KCNMB4   |
| hsa-mir-421 | RACGAP1  |
| hsa-mir-421 | LMCD1    |
| hsa-mir-421 | GMNN     |
| hsa-mir-421 | RPL26L1  |
| hsa-mir-421 | ZNF219   |
| hsa-mir-421 | DNAJC27  |
| hsa-mir-421 | RSRC1    |
| hsa-mir-421 | AMZ2     |
| hsa-mir-421 | RNF138   |
| hsa-mir-421 | TREM1    |
| hsa-mir-421 | VSIG10   |
| hsa-mir-421 | PQLC2    |
| hsa-mir-421 | YTHDF1   |
| hsa-mir-421 | GID8     |
| hsa-mir-421 | VPS37C   |
| hsa-mir-421 | ATG2B    |
| hsa-mir-421 | PNPO     |
| hsa-mir-421 | RIF1     |
| hsa-mir-421 | MIS18BP1 |
| hsa-mir-421 | LIN7C    |
| hsa-mir-421 | COPRS    |
| hsa-mir-421 | ZNF280C  |
| hsa-mir-421 | NDC1     |
| hsa-mir-421 | DOK4     |
| hsa-mir-421 | TSR1     |
| hsa-mir-421 | ZFP64    |
| hsa-mir-421 | CBWD1    |
| hsa-mir-421 | CMAS     |
| hsa-mir-421 | DUS3L    |
| hsa-mir-421 | CDC42SE2 |
| hsa-mir-421 | PARP11   |
| hsa-mir-421 | RALGAPB  |
| hsa-mir-421 | SENP7    |
| hsa-mir-421 | ISY1     |
| hsa-mir-421 | TNRC6C   |
| hsa-mir-421 | FAM160B1 |

|             |          |
|-------------|----------|
| hsa-mir-421 | CREBZF   |
| hsa-mir-421 | ARHGAP22 |
| hsa-mir-421 | NCAPG    |
| hsa-mir-421 | PCNX4    |
| hsa-mir-421 | RANBP2   |
| hsa-mir-421 | RBBP7    |
| hsa-mir-421 | REST     |
| hsa-mir-421 | TRIM27   |
| hsa-mir-421 | RGR      |
| hsa-mir-421 | RGS2     |
| hsa-mir-421 | RPL18A   |
| hsa-mir-421 | RPS10    |
| hsa-mir-421 | RPS18    |
| hsa-mir-421 | RREB1    |
| hsa-mir-421 | SCD      |
| hsa-mir-421 | SRSF7    |
| hsa-mir-421 | SLC6A13  |
| hsa-mir-421 | SLIT1    |
| hsa-mir-421 | SOD2     |
| hsa-mir-421 | SRP9     |
| hsa-mir-421 | SRPRA    |
| hsa-mir-421 | SYT4     |
| hsa-mir-421 | TAF9     |
| hsa-mir-421 | TCF7L2   |
| hsa-mir-421 | TUBB2A   |
| hsa-mir-421 | TXNRD1   |
| hsa-mir-421 | UBE2D3   |
| hsa-mir-421 | UQCRRS1  |
| hsa-mir-421 | ZNF208   |
| hsa-mir-421 | ZXDA     |
| hsa-mir-421 | RASAL1   |
| hsa-mir-421 | AP3B1    |
| hsa-mir-421 | USO1     |
| hsa-mir-421 | BTRC     |
| hsa-mir-421 | SLC28A1  |
| hsa-mir-421 | VAPA     |
| hsa-mir-421 | GOSR1    |
| hsa-mir-421 | TTC37    |
| hsa-mir-421 | CEP57    |
| hsa-mir-421 | KIAA0100 |
| hsa-mir-421 | TLK1     |
| hsa-mir-421 | DDX39A   |
| hsa-mir-421 | TUBA1B   |
| hsa-mir-421 | SLC9A6   |

|                |           |
|----------------|-----------|
| hsa-mir-421    | CAP1      |
| hsa-mir-421    | TM9SF1    |
| hsa-mir-421    | P3H4      |
| hsa-mir-421    | SPINT2    |
| hsa-mir-421    | CD226     |
| hsa-mir-421    | MTHFD2    |
| hsa-mir-421    | PPARGC1A  |
| hsa-mir-421    | MSL3      |
| hsa-mir-421    | CDC37     |
| hsa-mir-421    | TET1      |
| hsa-mir-421    | CD276     |
| hsa-mir-421    | PRR7      |
| hsa-mir-421    | GFOD2     |
| hsa-mir-421    | AHNAK     |
| hsa-mir-421    | TMEM109   |
| hsa-mir-421    | MRPL38    |
| hsa-mir-421    | GID4      |
| hsa-mir-421    | FBXO11    |
| hsa-mir-421    | RAB11FIP1 |
| hsa-mir-421    | QSER1     |
| hsa-mir-421    | CTC1      |
| hsa-mir-876-5p | EMP2      |
| hsa-mir-876-5p | EPB41L1   |
| hsa-mir-876-5p | P2RX7     |
| hsa-mir-876-5p | P2RY1     |
| hsa-mir-876-5p | PER1      |
| hsa-mir-876-5p | PTPN14    |
| hsa-mir-876-5p | RORA      |
| hsa-mir-876-5p | FOLR1     |
| hsa-mir-876-5p | FOXA2     |
| hsa-mir-876-5p | HSPD1     |
| hsa-mir-876-5p | HTR7      |
| hsa-mir-876-5p | IMPG1     |
| hsa-mir-876-5p | MAOB      |
| hsa-mir-876-5p | MAT2A     |
| hsa-mir-876-5p | DNAJB9    |
| hsa-mir-876-5p | HIST1H3E  |
| hsa-mir-876-5p | RGS5      |
| hsa-mir-876-5p | AKR7A2    |
| hsa-mir-876-5p | TIMELESS  |
| hsa-mir-876-5p | ABCG2     |
| hsa-mir-876-5p | RPS16     |
| hsa-mir-876-5p | ATXN1     |
| hsa-mir-876-5p | SSR2      |



|                |          |
|----------------|----------|
| hsa-mir-876-5p | AURKA    |
| hsa-mir-876-5p | TAPBP    |
| hsa-mir-876-5p | TPM4     |
| hsa-mir-876-5p | ZNF131   |
| hsa-mir-876-5p | SLC10A3  |
| hsa-mir-876-5p | ATP5F1   |
| hsa-mir-876-5p | CALM2    |
| hsa-mir-876-5p | CAPZA1   |
| hsa-mir-876-5p | CLCN6    |
| hsa-mir-876-5p | PYGO1    |
| hsa-mir-876-5p | VPS4A    |
| hsa-mir-876-5p | TOR1B    |
| hsa-mir-876-5p | TMX2     |
| hsa-mir-876-5p | C1RL     |
| hsa-mir-876-5p | PGPEP1   |
| hsa-mir-876-5p | RPP25    |
| hsa-mir-876-5p | RFWD3    |
| hsa-mir-876-5p | TXLNG    |
| hsa-mir-876-5p | ALG1     |
| hsa-mir-876-5p | C8orf4   |
| hsa-mir-876-5p | TAOK1    |
| hsa-mir-876-5p | ANO8     |
| hsa-mir-876-5p | PLEKHG2  |
| hsa-mir-876-5p | METTLL16 |
| hsa-mir-876-5p | CTC1     |
| hsa-mir-876-5p | RBM4B    |
| hsa-mir-876-5p | USP48    |
| hsa-mir-876-5p | ZNF502   |
| hsa-mir-876-5p | AGAP1    |
| hsa-mir-876-5p | BRI3BP   |
| hsa-mir-876-5p | PPM1K    |
| hsa-mir-876-5p | FUT11    |
| hsa-mir-876-5p | ZNF707   |
| hsa-mir-876-5p | S100A7A  |
| hsa-mir-876-5p | RBMXL1   |
| hsa-mir-876-5p | ARGFX    |
| hsa-mir-876-5p | C8orf58  |
| hsa-mir-876-5p | TOMM20   |
| hsa-mir-876-5p | WASF2    |
| hsa-mir-876-5p | ZNF256   |
| hsa-mir-876-5p | NDRG1    |
| hsa-mir-876-5p | PRDX3    |
| hsa-mir-876-5p | CBX1     |
| hsa-mir-876-5p | ZNF277   |

|                |          |
|----------------|----------|
| hsa-mir-876-5p | IKZF2    |
| hsa-mir-876-5p | ZNF507   |
| hsa-mir-876-5p | TTLL12   |
| hsa-mir-876-5p | MESD     |
| hsa-mir-876-5p | KIAA0895 |
| hsa-mir-3167   | MAOB     |
| hsa-mir-3167   | MAT2A    |
| hsa-mir-3167   | DNAJB9   |
| hsa-mir-3167   | P2RX7    |
| hsa-mir-3167   | P2RY1    |
| hsa-mir-3167   | PER1     |
| hsa-mir-3167   | PTPN14   |
| hsa-mir-3167   | RORA     |
| hsa-mir-3167   | RPS16    |
| hsa-mir-3167   | ATXN1    |
| hsa-mir-3167   | SSR2     |
| hsa-mir-3167   | AURKA    |
| hsa-mir-3167   | TAPBP    |
| hsa-mir-3167   | TPM4     |
| hsa-mir-3167   | ZNF131   |
| hsa-mir-3167   | SLC10A3  |
| hsa-mir-3167   | HIST1H3E |
| hsa-mir-3167   | RGS5     |
| hsa-mir-3167   | AKR7A2   |
| hsa-mir-3167   | TIMELESS |
| hsa-mir-3167   | ABCG2    |
| hsa-mir-3167   | TOMM20   |
| hsa-mir-3167   | WASF2    |
| hsa-mir-3167   | ZNF256   |
| hsa-mir-3167   | NDRG1    |
| hsa-mir-3167   | PRDX3    |
| hsa-mir-3167   | CBX1     |
| hsa-mir-3167   | ZNF277   |
| hsa-mir-3167   | IKZF2    |
| hsa-mir-3167   | ZNF507   |
| hsa-mir-3167   | TTLL12   |
| hsa-mir-3167   | MESD     |
| hsa-mir-3167   | KIAA0895 |
| hsa-mir-3167   | PYGO1    |
| hsa-mir-3167   | VPS4A    |
| hsa-mir-3167   | TOR1B    |
| hsa-mir-3167   | TMX2     |
| hsa-mir-3167   | C1RL     |
| hsa-mir-3167   | PGPEP1   |

|              |          |
|--------------|----------|
| hsa-mir-3167 | RPP25    |
| hsa-mir-3167 | RFWD3    |
| hsa-mir-3167 | TXLNG    |
| hsa-mir-3167 | ALG1     |
| hsa-mir-3167 | C8orf4   |
| hsa-mir-3167 | TAOK1    |
| hsa-mir-3167 | ANO8     |
| hsa-mir-3167 | PLEKHG2  |
| hsa-mir-3167 | METTLL16 |
| hsa-mir-3167 | CTC1     |
| hsa-mir-3167 | RBM4B    |
| hsa-mir-3167 | USP48    |
| hsa-mir-3167 | SRRM4    |
| hsa-mir-3167 | ZNF502   |
| hsa-mir-3167 | AGAP1    |
| hsa-mir-3167 | BRI3BP   |
| hsa-mir-3167 | PPM1K    |
| hsa-mir-3167 | FUT11    |
| hsa-mir-3167 | ZNF707   |
| hsa-mir-3167 | S100A7A  |
| hsa-mir-3167 | RBMXL1   |
| hsa-mir-3167 | ARGFX    |
| hsa-mir-3167 | C8orf58  |
| hsa-mir-3167 | CLCN6    |
| hsa-mir-3167 | ATP5F1   |
| hsa-mir-3167 | CALM2    |
| hsa-mir-3167 | CAPZA1   |
| hsa-mir-3167 | FOXA2    |
| hsa-mir-3167 | EMP2     |
| hsa-mir-3167 | EPB41L1  |
| hsa-mir-3167 | FOLR1    |
| hsa-mir-3167 | HSPD1    |
| hsa-mir-3167 | HTR7     |
| hsa-mir-3167 | IMPG1    |
| hsa-mir-4428 | UBE2G1   |
| hsa-mir-4428 | EIF4H    |
| hsa-mir-4428 | SF1      |
| hsa-mir-4428 | ZNF8     |
| hsa-mir-4428 | ZNF84    |
| hsa-mir-4428 | LUZP1    |
| hsa-mir-4428 | TAGLN2   |
| hsa-mir-4428 | TP63     |
| hsa-mir-4428 | KCNK5    |
| hsa-mir-4428 | VAMP8    |

|              |          |
|--------------|----------|
| hsa-mir-4428 | CD164    |
| hsa-mir-4428 | NOLC1    |
| hsa-mir-4428 | GTF3C4   |
| hsa-mir-4428 | TGFBRAP1 |
| hsa-mir-4428 | SH3PXD2A |
| hsa-mir-4428 | VGLL4    |
| hsa-mir-4428 | TRAM2    |
| hsa-mir-4428 | SPRY1    |
| hsa-mir-4428 | SPON2    |
| hsa-mir-4428 | VAV3     |
| hsa-mir-4428 | GIPC1    |
| hsa-mir-4428 | ARPP19   |
| hsa-mir-4428 | ZNF273   |
| hsa-mir-4428 | RALBP1   |
| hsa-mir-4428 | MAPRE3   |
| hsa-mir-4428 | MRPS27   |
| hsa-mir-4428 | FAM168A  |
| hsa-mir-4428 | SLC7A8   |
| hsa-mir-4428 | PSD4     |
| hsa-mir-4428 | CD2AP    |
| hsa-mir-4428 | CADM1    |
| hsa-mir-4428 | ANAPC13  |
| hsa-mir-4428 | ZNF385A  |
| hsa-mir-4428 | CNTNAP2  |
| hsa-mir-4428 | SLITRK5  |
| hsa-mir-4428 | GPKOW    |
| hsa-mir-4428 | A1CF     |
| hsa-mir-4428 | RAX      |
| hsa-mir-4428 | TMED5    |
| hsa-mir-4428 | SLC35C2  |
| hsa-mir-4428 | WAC      |
| hsa-mir-4428 | CSNK1G1  |
| hsa-mir-4428 | KLHL24   |
| hsa-mir-4428 | SAMD4B   |
| hsa-mir-4428 | STRADB   |
| hsa-mir-4428 | RBM38    |
| hsa-mir-4428 | IWS1     |
| hsa-mir-4428 | RUFY2    |
| hsa-mir-4428 | PSENN    |
| hsa-mir-4428 | EIF5A2   |
| hsa-mir-4428 | NUFIP2   |
| hsa-mir-4428 | PLA2G2F  |
| hsa-mir-4428 |          |
| hsa-mir-4428 | CREB3L2  |

1-Mar

|              |           |
|--------------|-----------|
| hsa-mir-4428 | METTL22   |
| hsa-mir-4428 | C1orf115  |
| hsa-mir-4428 | MYH14     |
| hsa-mir-4428 | NOL10     |
| hsa-mir-4428 | TTYH3     |
| hsa-mir-4428 | ARHGAP39  |
| hsa-mir-4428 | RAB1B     |
| hsa-mir-4428 | MIDN      |
| hsa-mir-4428 | RASL10B   |
| hsa-mir-4428 | MRRF      |
| hsa-mir-4428 | RP1L1     |
| hsa-mir-4428 | PRRT2     |
| hsa-mir-4428 | MB21D1    |
| hsa-mir-4428 | SNAP47    |
| hsa-mir-4428 | SLC16A10  |
| hsa-mir-4428 | C2CD4C    |
| hsa-mir-4428 | TCHHL1    |
| hsa-mir-4428 | ARHGAP42  |
| hsa-mir-4428 | DUSP18    |
| hsa-mir-4428 | PPP1R1C   |
| hsa-mir-4428 | AMOTL1    |
| hsa-mir-4428 | ZFP1      |
| hsa-mir-4428 | TTLL9     |
| hsa-mir-4428 | TOGARAM2  |
| hsa-mir-4428 | TXLNA     |
| hsa-mir-4428 | LGI3      |
| hsa-mir-4428 | SIAH3     |
| hsa-mir-4428 | CAVIN1    |
| hsa-mir-4428 | ZADH2     |
| hsa-mir-4428 | MSL1      |
| hsa-mir-4428 | PABPC1L2A |
| hsa-mir-4428 | LCE1B     |
| hsa-mir-4428 | PLEKHM3   |
| hsa-mir-4428 | BEND4     |
| hsa-mir-4428 | PABPC1L2B |
| hsa-mir-4428 | LINC01556 |
| hsa-mir-4428 | ANXA11    |
| hsa-mir-4428 | CALM3     |
| hsa-mir-4428 | CALR      |
| hsa-mir-4428 | CASP2     |
| hsa-mir-4428 | CCND2     |
| hsa-mir-4428 | CHRM3     |
| hsa-mir-4428 | DDX6      |
| hsa-mir-4428 | DFFB      |

|                 |        |
|-----------------|--------|
| hsa-mir-4428    | COCH   |
| hsa-mir-4428    | DLX6   |
| hsa-mir-4428    | EFNB1  |
| hsa-mir-4428    | ELF3   |
| hsa-mir-4428    | EN2    |
| hsa-mir-4428    | ENSA   |
| hsa-mir-4428    | EP300  |
| hsa-mir-4428    | FPR1   |
| hsa-mir-4428    | GRSF1  |
| hsa-mir-4428    | FOXA1  |
| hsa-mir-4428    | IGF2   |
| hsa-mir-4428    | INCENP |
| hsa-mir-4428    | ITPKB  |
| hsa-mir-4428    | KPNA4  |
| hsa-mir-4428    | TNPO1  |
| hsa-mir-4428    | LDLR   |
| hsa-mir-4428    | MAX    |
| hsa-mir-4428    | MECP2  |
| hsa-mir-4428    | MID1   |
| hsa-mir-4428    | MOG    |
| hsa-mir-4428    | TRIM37 |
| hsa-mir-4428    | NAB2   |
| hsa-mir-4428    | NDUFS1 |
| hsa-mir-4428    | NPM1   |
| hsa-mir-4428    | CDK14  |
| hsa-mir-4428    | PTK7   |
| hsa-mir-4428    | RAD21  |
| hsa-mir-4428    | RFX3   |
| hsa-mir-4428    | RPS15A |
| hsa-mir-4428    | SHMT2  |
| hsa-mir-4428    | SIX3   |
| hsa-mir-4428    | SNRPB  |
| hsa-mir-4428    | SOX4   |
| hsa-mir-4428    | SP1    |
| hsa-mir-4428    | STK4   |
| hsa-mir-4428    | TMBIM6 |
| hsa-mir-4428    | TFAP4  |
| hsa-mir-4428    | TFDP2  |
| hsa-mir-4428    | TPM3   |
| hsa-mir-4761-3p | RHOG   |
| hsa-mir-4761-3p | DNM2   |
| hsa-mir-4761-3p | MARK2  |
| hsa-mir-4761-3p | EVX1   |
| hsa-mir-4761-3p | HNRNPU |

|                 |          |
|-----------------|----------|
| hsa-mir-4761-3p | ID2      |
| hsa-mir-4761-3p | MAZ      |
| hsa-mir-4761-3p | MDK      |
| hsa-mir-4761-3p | PPP1R12A |
| hsa-mir-4761-3p | MAPK1    |
| hsa-mir-4761-3p | SSTR3    |
| hsa-mir-4761-3p | ZNF223   |
| hsa-mir-4761-3p | BTG2     |
| hsa-mir-4761-3p | TAGLN2   |
| hsa-mir-4761-3p | OGT      |
| hsa-mir-4761-3p | TM9SF1   |
| hsa-mir-4761-3p | ARPP19   |
| hsa-mir-4761-3p | ZNF460   |
| hsa-mir-4761-3p | MTUS2    |
| hsa-mir-4761-3p | JADE2    |
| hsa-mir-4761-3p | ZNF281   |
| hsa-mir-4761-3p | ATP6V0A2 |
| hsa-mir-4761-3p | SMUG1    |
| hsa-mir-4761-3p | TMEM2    |
| hsa-mir-4761-3p | BRD7     |
| hsa-mir-4761-3p | SH3GLB1  |
| hsa-mir-4761-3p | CTDSPL2  |
| hsa-mir-4761-3p | WDR45B   |
| hsa-mir-4761-3p | CCNL1    |
| hsa-mir-4761-3p | ENTPD7   |
| hsa-mir-4761-3p | RAB25    |
| hsa-mir-4761-3p | NABP1    |
| hsa-mir-4761-3p | SH3TC2   |
| hsa-mir-4761-3p | ZMAT4    |
| hsa-mir-4761-3p | RUBCNL   |
| hsa-mir-4761-3p | ZNF594   |
| hsa-mir-4761-3p | MIDN     |
| hsa-mir-4761-3p | MCFD2    |
| hsa-mir-4761-3p | IFFO2    |
| hsa-mir-4761-3p | TRIM71   |
| hsa-mir-4761-3p | SESN3    |
| hsa-mir-4761-3p | ZNF322P1 |
| hsa-mir-4761-3p | POTEG    |
| hsa-mir-4761-3p | POTEM    |
| hsa-mir-873-3p  | ALDH1B1  |
| hsa-mir-873-3p  | SERPING1 |
| hsa-mir-873-3p  | CA6      |
| hsa-mir-873-3p  | CD40LG   |
| hsa-mir-873-3p  | CDKN1A   |

|                |           |
|----------------|-----------|
| hsa-mir-873-3p | CHD3      |
| hsa-mir-873-3p | COL9A2    |
| hsa-mir-873-3p | CRK       |
| hsa-mir-873-3p | CSTF1     |
| hsa-mir-873-3p | EGR3      |
| hsa-mir-873-3p | ENSA      |
| hsa-mir-873-3p | ERCC4     |
| hsa-mir-873-3p | F2RL2     |
| hsa-mir-873-3p | FKBP1A    |
| hsa-mir-873-3p | GABRB1    |
| hsa-mir-873-3p | HDGF      |
| hsa-mir-873-3p | CXCL10    |
| hsa-mir-873-3p | IRAK2     |
| hsa-mir-873-3p | KCNN3     |
| hsa-mir-873-3p | LYZ       |
| hsa-mir-873-3p | NUCB1     |
| hsa-mir-873-3p | OLR1      |
| hsa-mir-873-3p | CDK16     |
| hsa-mir-873-3p | NPY4R     |
| hsa-mir-873-3p | MAP2K2    |
| hsa-mir-873-3p | PRKX      |
| hsa-mir-873-3p | TMPRSS15  |
| hsa-mir-873-3p | QSOX1     |
| hsa-mir-873-3p | RPL12     |
| hsa-mir-873-3p | RPL18A    |
| hsa-mir-873-3p | MSMO1     |
| hsa-mir-873-3p | TRAPPC2   |
| hsa-mir-873-3p | TADA2A    |
| hsa-mir-873-3p | KLF10     |
| hsa-mir-873-3p | TUFT1     |
| hsa-mir-873-3p | UGDH      |
| hsa-mir-873-3p | UQCRRS1   |
| hsa-mir-873-3p | VHL       |
| hsa-mir-873-3p | VSNL1     |
| hsa-mir-873-3p | ZFX       |
| hsa-mir-873-3p | ZNF157    |
| hsa-mir-873-3p | FZD5      |
| hsa-mir-873-3p | HIST1H2BG |
| hsa-mir-873-3p | AKR7A2    |
| hsa-mir-873-3p | EIF3H     |
| hsa-mir-873-3p | SLC16A3   |
| hsa-mir-873-3p | RASSF9    |
| hsa-mir-873-3p | B4GALT5   |
| hsa-mir-873-3p | SOCS5     |



|                |          |
|----------------|----------|
| hsa-mir-873-3p | PPIP5K1  |
| hsa-mir-873-3p | HEPH     |
| hsa-mir-873-3p | TRIM66   |
| hsa-mir-873-3p | SLC35E2  |
| hsa-mir-873-3p | ABCC5    |
| hsa-mir-873-3p | DCAF7    |
| hsa-mir-873-3p | PCGF3    |
| hsa-mir-873-3p | COLEC10  |
| hsa-mir-873-3p | NUPL2    |
| hsa-mir-873-3p | DDX19B   |
| hsa-mir-873-3p | SEPHS1   |
| hsa-mir-873-3p | KIN      |
| hsa-mir-873-3p | POFUT2   |
| hsa-mir-873-3p | CSTF2T   |
| hsa-mir-873-3p | USP22    |
| hsa-mir-873-3p | JADE2    |
| hsa-mir-873-3p | ATP6V0A2 |
| hsa-mir-873-3p | TMEM245  |
| hsa-mir-873-3p | GAPVD1   |
| hsa-mir-873-3p | FBXL3    |
| hsa-mir-873-3p | ARL5A    |
| hsa-mir-873-3p | SIGLEC8  |
| hsa-mir-873-3p | HCAR1    |
| hsa-mir-873-3p | SESN1    |
| hsa-mir-873-3p | TMED7    |
| hsa-mir-873-3p | DCTN4    |
| hsa-mir-873-3p | ANGPT4   |
| hsa-mir-873-3p | PHF7     |
| hsa-mir-873-3p | MBD3     |
| hsa-mir-873-3p | GPR173   |
| hsa-mir-873-3p | CCSER2   |
| hsa-mir-873-3p | GNL3L    |
| hsa-mir-873-3p | BNC2     |
| hsa-mir-873-3p | ZNF331   |
| hsa-mir-873-3p | CAMK2N1  |
| hsa-mir-873-3p | POLR3E   |
| hsa-mir-873-3p | ERBIN    |
| hsa-mir-873-3p | PCNP     |
| hsa-mir-873-3p | PHTF2    |
| hsa-mir-873-3p | CC2D2A   |
| hsa-mir-873-3p | USP36    |
| hsa-mir-873-3p | KIAA1456 |
| hsa-mir-873-3p | RANBP10  |
| hsa-mir-873-3p | SH2D4A   |

|                |            |
|----------------|------------|
| hsa-mir-873-3p | HERPUD2    |
| hsa-mir-873-3p | NBEAL1     |
| hsa-mir-873-3p | METRN      |
| hsa-mir-873-3p | CDC73      |
| hsa-mir-873-3p | TMC5       |
| hsa-mir-873-3p | TRMT2B     |
| hsa-mir-873-3p | CLPB       |
| hsa-mir-873-3p | ZNF611     |
| hsa-mir-873-3p | C9orf64    |
| hsa-mir-873-3p | ZBED3      |
| hsa-mir-873-3p | FAXC       |
| hsa-mir-873-3p | HES7       |
| hsa-mir-873-3p | HIST1H2AH  |
| hsa-mir-873-3p | MIDN       |
| hsa-mir-873-3p | KNSTRN     |
| hsa-mir-873-3p | TIMM29     |
| hsa-mir-873-3p | MYLK3      |
| hsa-mir-873-3p | DSEL       |
| hsa-mir-873-3p | SYAP1      |
| hsa-mir-873-3p | FAM83F     |
| hsa-mir-873-3p | TSPEAR-AS2 |
| hsa-mir-873-3p | TTC39C     |
| hsa-mir-873-3p | ZNF440     |
| hsa-mir-873-3p | CHCHD4     |
| hsa-mir-873-3p | SLC2A14    |
| hsa-mir-873-3p | ZNF417     |
| hsa-mir-873-3p | SPC24      |
| hsa-mir-873-3p | CKAP2L     |
| hsa-mir-873-3p | CNTN4      |
| hsa-mir-873-3p | PPTC7      |
| hsa-mir-873-3p | OR7D2      |
| hsa-mir-873-3p | AAED1      |
| hsa-mir-873-3p | ARID2      |
| hsa-mir-873-3p | STK32A     |
| hsa-mir-873-3p | SAMD9L     |
| hsa-mir-873-3p | RNF152     |
| hsa-mir-873-3p | TMED4      |
| hsa-mir-873-3p | SCUBE3     |
| hsa-mir-873-3p | NKAPL      |
| hsa-mir-873-3p | DEFB105A   |
| hsa-mir-873-3p | ZNF549     |
| hsa-mir-873-3p | SPRYD4     |
| hsa-mir-873-3p | C17orf105  |
| hsa-mir-873-3p | FAM102B    |

|                |           |
|----------------|-----------|
| hsa-mir-873-3p | ZNF619    |
| hsa-mir-873-3p | COX18     |
| hsa-mir-873-3p | RPL7L1    |
| hsa-mir-873-3p | C9orf47   |
| hsa-mir-873-3p | ANKRD42   |
| hsa-mir-873-3p | KLHL38    |
| hsa-mir-873-3p | SMTNL2    |
| hsa-mir-873-3p | ZNF850    |
| hsa-mir-873-3p | MTX3      |
| hsa-mir-873-3p | PLA2G2C   |
| hsa-mir-873-3p | FOXL2NB   |
| hsa-mir-873-3p | MXRA7     |
| hsa-mir-873-3p | ZNF716    |
| hsa-mir-873-3p | FBXO47    |
| hsa-mir-873-3p | DEFB105B  |
| hsa-mir-873-3p | ZNF487    |
| hsa-mir-873-3p | STMP1     |
| hsa-mir-873-3p | LINC01556 |
| hsa-mir-873-3p | HTR5A-AS1 |
| hsa-mir-873-3p | KLLN      |
| hsa-mir-873-3p | ZNF783    |
| hsa-mir-873-3p | SLFN12L   |

Table S3. Expression levels of potential miRNAs of PTTG3P in breast cancer and normal controls.

| miRNA ID        | Accession    | Average expression in cancer | Average expression in normal | P-value  |
|-----------------|--------------|------------------------------|------------------------------|----------|
| hsa-miR-505-3p  | MIMAT0002876 | 42.77                        | 39.06                        | 0.022    |
| hsa-miR-421     | MIMAT0003339 | 2.23                         | 1.15                         | 5.70E-07 |
| hsa-miR-4428    | MIMAT0018943 | 0.01                         | 0.01                         | 0.77     |
| hsa-miR-873-3p  | MIMAT0022717 | 0.04                         | 0.01                         | 0.05     |
| hsa-miR-3167    | MIMAT0015042 | 0.01                         | 0.01                         | 0.8      |
| hsa-miR-876-5p  | MIMAT0004924 | 0.04                         | 0.03                         | 0.72     |
| hsa-miR-4761-3p | MIMAT0019909 | 0.01                         | 0.01                         | 0.52     |
| hsa-miR-129-5p  | MIMAT0000242 | 4.71                         | 6.6                          | 2.70E-15 |
| hsa-miR-212-3p  | MIMAT0000269 | 3.97                         | 4.03                         | 0.89     |
| hsa-miR-132-3p  | MIMAT0000426 | 74.61                        | 98.08                        | 0.093    |
| hsa-miR-376c-3p | MIMAT0000720 | 4.42                         | 9.37                         | 1.80E-14 |
| hsa-miR-383-5p  | MIMAT0000738 | 1.67                         | 4.3                          | 2.00E-41 |

Table S4. Co-expressed genes of PTTG3P obtained by UALCAN database.

---

Co-expressed genes of PTTG3P

---

PTTG1  
UBE2C  
CDCA3  
TROAP  
AURKB  
CENPA  
CKS2  
SKA1  
CDC25C  
CCNB2  
CDC20  
CENPW  
KIF18B  
PIF1  
KIF2C  
HMMR  
CDC45  
UBE2T  
HJURP  
KIFC1  
CCNB1  
ZNF695  
RAD54L  
TPX2  
TACC3  
E2F8  
E2F1  
KIF20A  
NCAPG  
OIP5  
CDCA8  
TUBA1C  
NDC80  
SNRPG  
PLK1  
UBE2S  
CKS1B  
SPC25  
LMNB2  
PA2G4P4  
CCDC99  
SNRPA

MRPS5  
KIF15  
FAM64A  
C1orf135  
SNRPD1  
C16orf61  
CDT1  
UQCRH  
CDKN3  
DSCC1  
BIRC5  
NUF2  
FAM54A  
C17orf53  
MELK  
MAGOH  
FAM72B  
FOXM1  
PSRC1  
TOMM5  
CENPN  
DTD1  
GTSE1  
TCOF1  
LYAR  
BOLA3  
DEPDC1B  
H2AFZ  
TRIP13  
DDX12  
DLGAP5  
LMNB1  
EZH2  
ORC6L  
MND1  
RANBP1  
RNASEH2A  
CDC25A  
KIF4A  
RFC4  
SKA3  
TTK  
NUSAP1  
CHEK2

KIF11  
CDKN2A  
CEP55  
NOP2  
EXO1  
NEK2  
WDR4  
RECQL4  
ORC1L  
LSM2  
FAM83D  
RAD51AP1  
TUBA1B  
TRAIP  
PHF19  
FAM136A  
MYBL2  
SGOL1  
MIR17HG  
DBF4  
MCM7  
UQCRHL  
CCNA2  
STMN1  
NOP16  
NDUFA9  
CDCA5  
DTYMK  
PSMB2  
RAD51  
SNRPC  
MRPL51  
PKMYT1  
C15orf23  
BUB1  
MXD3  
EPR1  
POLQ  
SHFM1  
PFDN2  
NDUFAF4  
TPI1  
CENPH  
PBK

PDCD5  
LOC388955  
DEPDC1  
FEN1  
C6orf129  
CCDC58  
CDCA7  
HMGB2  
SLC25A19  
KIF23  
MFSD2B  
ERCC6L  
PSMG1  
ATP5EP2  
NCAPH  
CDK1  
MAD2L1  
NPM3  
ECE2  
PDSS1  
C9orf40  
ASPM  
NEIL3  
GSG2  
LOC100130932  
GAPDH  
MED30  
NUDT1  
ESPL1  
FBXO5  
PPIL5  
FAM72A  
DONSON  
GMNN  
HMGA1  
KIF14  
MAGOHB  
TCF19  
ATP5J2  
MLF2  
PRELID1  
FANCA  
POLR2F  
LOC341056

RFC2  
HNRNPAB  
AURKAPS1  
SF3B14  
GRK6  
RPIA  
RCCD1  
KIF18A  
CENPM  
PDHA1  
GINS1  
RHEB  
AURKA  
THOC4  
RRP1  
NCAPG2  
BUB1B  
BRX1  
TOMM40  
LBR  
CTPS  
ENY2  
WDR67  
NUDT5  
CHAC2  
CEBPB  
SNHG1  
ASF1B  
NXT1  
LSM7  
TXN  
C12orf48  
C5orf34  
DDX11  
NASP  
DDX39  
POC1A  
C9orf100  
FANCG  
BLM  
GPSM2  
FAM72D  
DAZAP1  
ANP32E



PSMG3  
FANCE

---

Table S5. Sequences of primers used in this study.

---

| qRT-PCR primers |                | Sequences              |
|-----------------|----------------|------------------------|
| PTTG3P          | Forward primer | GGGGTCTGGACCTTCAATCAA  |
| PTTG3P          | Reverse primer | GCTTTAGGTAAGGATGTGGGA  |
| PTTG1           | Forward primer | ACCCGTGTGGTTGCTAAGG    |
| PTTG1           | Reverse primer | ACGTGGTGTTGAAACTTGAGAT |
| PTTG2           | Forward primer | ATTGGAGAACCAGGCACC     |
| PTTG2           | Reverse primer | CGTCGTGTTAAACTTGAGATA  |
| U6              | Forward primer | CTCGCTTCGGCAGCACA      |
| U6              | Reverse primer | GAAGCCUAGAGGAUUGAAGGG  |
| GAPDH           | Forward primer | AATGGACA ACTGGTCGTGGAC |
| GAPDH           | Reverse primer | CCCTCCAGGGGATCTGTTTG   |

---
