# Supplementary material for: High Expression of Pseudogene PTTG3P Indicates a Poor Prognosis in Human Breast Cancer
Source: PubMed Central journal article supplement (PMC6463746; doi:10.1016/j.omto.2019.03.006), 2019-03-27
Supplement: mmc2.pdf [file mmc2.pdf]

# High Expression of Pseudogene PTTG3P Indicates a Poor Prognosis in Human Breast Cancer

Weiyang Lou,<sup>1,2,3</sup> Bisha Ding,<sup>1,2,3</sup> and Weimin Fan<sup>1,2,3,4</sup>

<sup>1</sup>Program of Innovative Cancer Therapeutics, Division of Hepatobiliary and Pancreatic Surgery, Department of Surgery, First Affiliated Hospital, College of Medicine, Zhejiang University, Hangzhou 310003, China; <sup>2</sup>Key Laboratory of Organ Transplantation, Zhejiang Province, Hangzhou 310003, China; <sup>3</sup>Key Laboratory of Combined Multi-organ Transplantation, Ministry of Public Health, Hangzhou 310000, China; <sup>4</sup>Department of Pathology and Laboratory Medicine, Medical University of South Carolina, Charleston, SC 29425, USA

**Pseudogenes play pivotal roles in tumorigenesis. Previous studies have suggested that pituitary tumor-transforming 3, pseudogene (PTTG3P), serves as an oncogene in human cancers. However, its expression pattern, biological function, and underlying mechanism in breast cancer remain unknown. In this study, we demonstrated an elevated expression of PTTG3P in breast cancer and discovered that PTTG3P expression correlated negatively with estrogen receptor (ER) and progesterone receptor (PR) status, but linked positively to basal-like status, triple-negative breast cancer status, Nottingham prognostic index (NPI), and Scarff-Bloom-Richardson grade. High expression of PTTG3P was also found to be associated with a poor prognosis of breast cancer. To explore the potential mechanisms of PTTG3P, a PTTG3P-microRNA (miRNA)-mRNA regulatory network was established. Co-expressed genes of PTTG3P were also obtained. Enrichment analysis for these co-expressed genes revealed that they were significantly enriched in mitotic nuclear division and cell cycle. Subsequent research on mechanism of PTTG3P indicated that its expression correlated positively with PTTG1 expression. However, no significant expression correlation between PTTG3P and PTTG2 was observed. Taken together, our findings suggest that increased expression of pseudogene PTTG3P may be used as a promising prognostic biomarker and novel therapeutic target for breast cancer.**

## INTRODUCTION

Breast cancer is one of the most common malignancies and remains a leading cause of cancer-related deaths in the female worldwide.<sup>1</sup> The incidence of breast cancer is gradually increasing in most countries, including the United States.<sup>2</sup> Despite the huge improvements in screening, diagnosis, and treatment of breast cancer that have been achieved, the patient's prognosis is still dismal. Thus, it is extremely meaningful and also urgent to search and develop more sensitive and specific prognostic biomarkers for patients with breast cancer.

Pseudogenes, a class of non-coding RNAs and segments of DNA that are related to real functional genes, are traditionally recognized as "junk genes" or "genomic fossils" because they have lost functionality.<sup>3</sup> Based on the formation mechanism, pseudogenes are generally classified into three subtypes: unitary pseudogenes, duplicated pseudogenes,

and processed pseudogenes.<sup>4</sup> Recent studies have reported that pseudogenes play important roles in regulating parental genes by functioning as antisense RNAs, small-interference RNAs (siRNAs), or endogenous competitors for microRNA (miRNA), RNA-binding protein, or translational machinery.<sup>4</sup> Pseudogenes are frequently dysregulated in multiple human cancers, and the dysregulation results in cancer onset and progression.<sup>5-7</sup>

Pituitary tumor-transforming 3, pseudogene (PTTG3P), is a processed pseudogene that shows high homology to its family members, pituitary tumor-transforming 1 (PTTG1) and -2 (PTTG2).<sup>8</sup> Numerous investigations have shown that PTTG1 and -2 serve as two key oncogenes in a variety of human cancers, including breast cancer,<sup>9,10</sup> lung cancer,<sup>11</sup> pituitary adenoma,<sup>12</sup> and esophageal squamous cell cancer.<sup>13</sup> However, there are only a few reports regarding the expression and roles of PTTG3P in cancer. One study, conducted by Weiwei Weng et al.,<sup>14</sup> revealed that PTTG3P promotes proliferation and invasion and is an indicator of poor prognosis in gastric cancer. Huang et al.<sup>15</sup> found that PTTG3P enhances hepatocellular carcinoma (HCC) growth and metastasis via upregulating PTTG1 and activating PI3K/AKT signaling. Notably, the expression, function, and corresponding regulatory mechanisms of PTTG3P in breast cancer remain unclear and need to be further elucidated.

Herein, we first assessed the expression pattern of PTTG3P in human breast cancer by data mining and experimental validation. Then, the prognostic significance of PTTG3P expression in breast cancer was also analyzed. Finally, we explored several potential mechanisms of PTTG3P in breast cancer, including construction of the pseudogene

Received 1 December 2018; accepted 13 March 2019;  
<https://doi.org/10.1016/j.omto.2019.03.006>.

**Correspondence:** Weiyang Lou, Program of Innovative Cancer Therapeutics, Division of Hepatobiliary and Pancreatic Surgery, Department of Surgery, First Affiliated Hospital, College of Medicine, Zhejiang University, Hangzhou 310003, China.

**E-mail:** [11718264@zju.edu.cn](mailto:11718264@zju.edu.cn)

**Correspondence:** Weimin Fan, Program of Innovative Cancer Therapeutics, Division of Hepatobiliary and Pancreatic Surgery, Department of Surgery, First Affiliated Hospital, College of Medicine, Zhejiang University, Hangzhou 310003, China.

**E-mail:** [fanw@zju.edu.cn](mailto:fanw@zju.edu.cn)

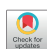

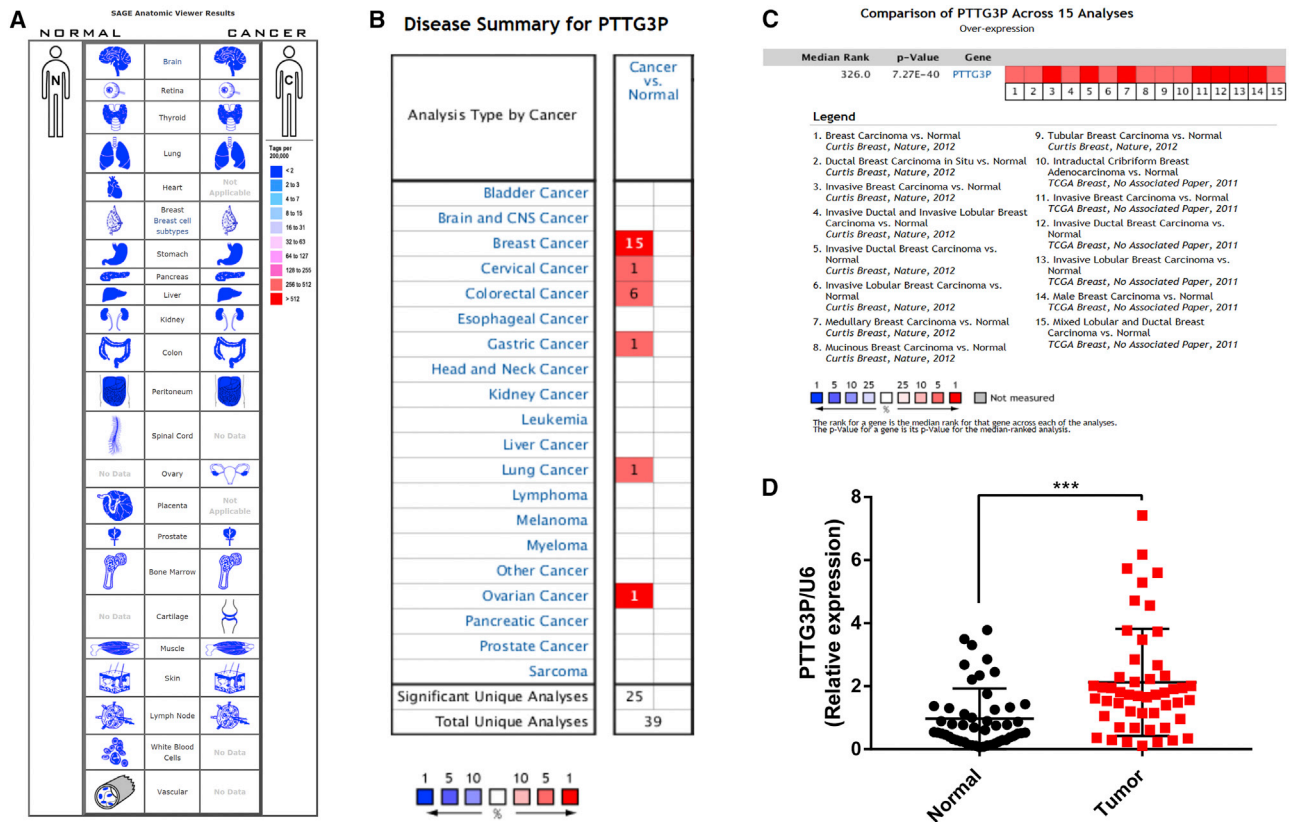

**Figure 1. Expression Pattern of PTTG3P in Human Breast Cancer**

(A) Expression profile of PTTG3P determined by the SAGE Digital Gene Expression Displayer; (B) expression of PTTG3P in different types of cancers by OncoPrint analysis of cancer versus normal samples; (C) expression of PTTG3P in breast cancer by OncoPrint meta-analysis; and (D) expression of PTTG3P in breast cancer samples compared with matched normal samples. Error bars represent SD. \*\*\* $p < 0.001$ .

PTTG3P-miRNA-mRNA network, analysis of co-expressed genes, and assessment of its correlation with parental genes PTTG1 and -2. These findings facilitate understanding of PTTG3P's roles and mechanisms in human breast cancer.

## RESULTS

### Pseudogene PTTG3P Expression in Human Breast Cancer

The expression profile of pseudogene PTTG3P in human breast cancer was first determined by using the SAGE (Serial Analysis of Gene Expression) Digital Gene Expression Display. As shown in Figure 1A, pseudogene PTTG3P expression was not significantly dysregulated in all cancer tissues when compared with corresponding normal tissues, including breast cancer. Next, OncoPrint analysis of cancer versus normal samples was used to analyze the expression profile of pseudogene PTTG3P in human breast cancer (Figure 1B). OncoPrint meta-analysis was further employed to assess the comprehensive median expression of pseudogene PTTG3P across 15 analyses (Figure 1C). As presented in Table 1, expression of pseudogene PTTG3P was significantly higher in medullary breast carcinoma, invasive breast carcinoma, invasive lobular breast carcinoma, invasive ductal breast carcinoma, mucinous breast carcinoma, ductal breast carcinoma

*in situ*, male breast carcinoma, intraductal cribriform breast adenocarcinoma, and mixed lobular and ductal breast carcinoma. For further validation, we also detected the expression of pseudogene PTTG3P in clinical breast cancer samples. As shown in Figure 1D, pseudogene PTTG3P expression in breast cancer tissues was markedly higher than that in normal tissues. All evidence taken together, by combining bioinformatics analysis and experimental validation, we demonstrated that PTTG3P was significantly overexpressed in human breast cancer.

We further investigated the associations between pseudogene PTTG3P expression and different clinicopathological characteristics in patients with breast cancer, by using bc-GenExMiner (Figure 2; Table S1). Analytic results suggested that there are no significant differences between the  $\leq 51$ - and  $>51$ -year group ( $p = 0.4159$ ). Nodal and HER2 status also showed no significant differences between the positive and negative groups (nodal status:  $p = 0.1266$ ; HER2 status:  $p = 0.1423$ ). Estrogen receptor (ER) and progesterone receptor (PR) status were discovered to be negatively linked to pseudogene PTTG3P expression (ER status:  $p < 0.0001$ ; PR status:  $p < 0.0001$ ). Pseudogene PTTG3P was significantly upregulated in basal-like or triple-negative breast cancer when compared with their counterparts (basal-like

**Table 1. Significant Changes of PTTG3P Expression in the Transcriptional Level between Different Types of Breast Cancer and Normal Tissues (Oncomine Database)**

| Subtype of Breast Cancer                              | p Value   | Fold Change | t Test | Rank | Sample Count | Reporter ID  |
|-------------------------------------------------------|-----------|-------------|--------|------|--------------|--------------|
| Medullary breast carcinoma                            | 1.52E-19  | 6.164       | 17.706 | 1%   | 176          | ILMN_2049021 |
| Invasive breast carcinoma                             | 3.63E-9   | 3.270       | 9.087  | 1%   | 165          | ILMN_2049021 |
| Invasive ductal breast carcinoma                      | 6.87E-111 | 3.429       | 39.869 | 1%   | 1700         | ILMN_2049021 |
| Invasive lobular breast carcinoma                     | 7.27E-40  | 2.371       | 16.045 | 2%   | 292          | ILMN_2049021 |
| Invasive ductal and invasive lobular breast carcinoma | 3.69E-29  | 2.791       | 14.788 | 2%   | 234          | ILMN_2049021 |
| Mucinous breast carcinoma                             | 1.77E-15  | 2.462       | 10.742 | 3%   | 190          | ILMN_2049021 |
| Ductal breast carcinoma <i>in Situ</i>                | 2.13E-4   | 2.508       | 5.291  | 4%   | 154          | ILMN_2049021 |
| Breast carcinoma                                      | 3.76E-5   | 2.915       | 5.595  | 5%   | 158          | ILMN_2049021 |
| Tubular breast carcinoma                              | 7.17E-20  | 2.325       | 11.684 | 5%   | 211          | ILMN_2049021 |
| Male breast carcinoma                                 | 1.14E-17  | 2.467       | 12.903 | 1%   | 64           | A_23_P60016  |
| Invasive ductal breast carcinoma                      | 1.35E-45  | 4.791       | 24.131 | 1%   | 450          | A_23_P60016  |
| Invasive lobular breast carcinoma                     | 1.05E-16  | 3.327       | 11.193 | 1%   | 97           | A_23_P60016  |
| Invasive breast carcinoma                             | 2.86E-27  | 3.547       | 13.653 | 1%   | 137          | A_23_P60016  |
| Intraductal cribriform breast adenocarcinoma          | 6.92E-6   | 3.115       | 9.941  | 3%   | 64           | A_23_P60016  |
| Mixed lobular and ductal breast carcinoma             | 7.72E-5   | 2.553       | 6.204  | 4%   | 68           | A_23_P60016  |

status:  $p < 0.0001$ ; triple-negative status:  $p < 0.0001$ ). The Nottingham prognostic index (NPI) is often used to determine prognosis after surgery for breast cancer. A higher NPI correlated significantly with higher expression of pseudogene PTTG3P expression. Similarly, a more advanced Scarff-Bloom-Richardson (SBR) grade was associated with higher expression of pseudogene PTTG3P expression. To summarize, these results demonstrate that pseudogene PTTG3P expression may play an unfavorable role in patients with breast cancer.

#### Prognostic Significance of the Pseudogene PTTG3P in Human Breast Cancer

Next, the prognostic value of pseudogene PTTG3P mRNA in human breast cancer was further evaluated, using three online databases, including the Kaplan-Meier Plotter, UALCAN, and OncoLnc (Figure 3). As shown in Figures 3A–3D (Kaplan-Meier Plotter), we found that higher expression of pseudogene PTTG3P indicated poorer relapse-free survival (RFS,  $p = 0.00033$ ), distant metastasis-free survival (DMFS,  $p = 0.025$ ) and overall survival (OS,  $p = 0.0083/8.8e-05$ ). The analytic result from UALCAN database showed that high expression of pseudogene PTTG3P suggested unfavorable prognosis of patients with breast cancer ( $P = 0.048$ ). The data from the OncoLnc database also revealed that high expression of PTTG3P was significantly associated with poor prognosis ( $p = 0.0265$ ). All these findings indicate that PTTG3P may serve as a poor predictor of prognosis of patients with breast cancer.

#### Construction of Potential Pseudogene PTTG3P-miRNA-mRNA Regulatory Network

Subsequently, we explored potential regulatory mechanisms of pseudogene PTTG3P, among which the competing endogenous RNA (ceRNA) hypothesis may be a representative approach.<sup>7</sup> Twelve

miRNAs (miR-132-3p, miR-129-5p, miR-212-3p, miR-876-5p, miR-3167, miR-873-3p, miR-4428, miR-4761-3p, miR-421, miR-376c-3p, miR-505-3p, and miR-383-5p) were identified as the candidate miRNAs for pseudogene PTTG3P by starBase v3.0, and 1,713 potential targets of these identified miRNAs were predicted using miRNet (Figure 4A). These miRNA-target gene pairs are listed in Table S2. The pseudogene PTTG3P-miRNA-mRNA regulatory network was finally constructed. Based on the ceRNA mechanism, expression of downstream miRNAs of PTTG3P in breast cancer samples should be decreased when compared with normal controls. Therefore, we further determined the expression of the 12 potential miRNAs in breast cancer by using The Cancer Genome Atlas (TCGA) data (Table S3). Expression levels of miR-129-5p, miR-376c-3p, and miR-383-5p were significantly lower in breast cancer tissues than that in normal tissues, as presented in Figures 4B–4D, respectively. Our current findings suggest that pseudogene PTTG3P may exert oncogenic roles via this miRNA-mRNA regulatory network. However, more experiments need to be conducted to further validate these findings.

#### Co-expressed Genes of Pseudogene PTTG3P and Functional Enrichment Analysis

Identifying the co-expressed genes would facilitate a better understanding of potential functions of PTTG3P in breast cancer. Thus, the co-expressed genes of pseudogene PTTG3P were predicted by using the UALCAN database, and a total of 220 co-expressed genes were finally obtained, as presented in Table S4. Next, the STRING database was introduced, to construct a protein-protein interaction (PPI) network for these co-expressed genes (Figure S1). Moreover, we performed functional analysis for these genes. Three categories of Gene Ontology (GO) functional annotation were included, using the Enrichr database: biological process (BP), cellular component (CC),

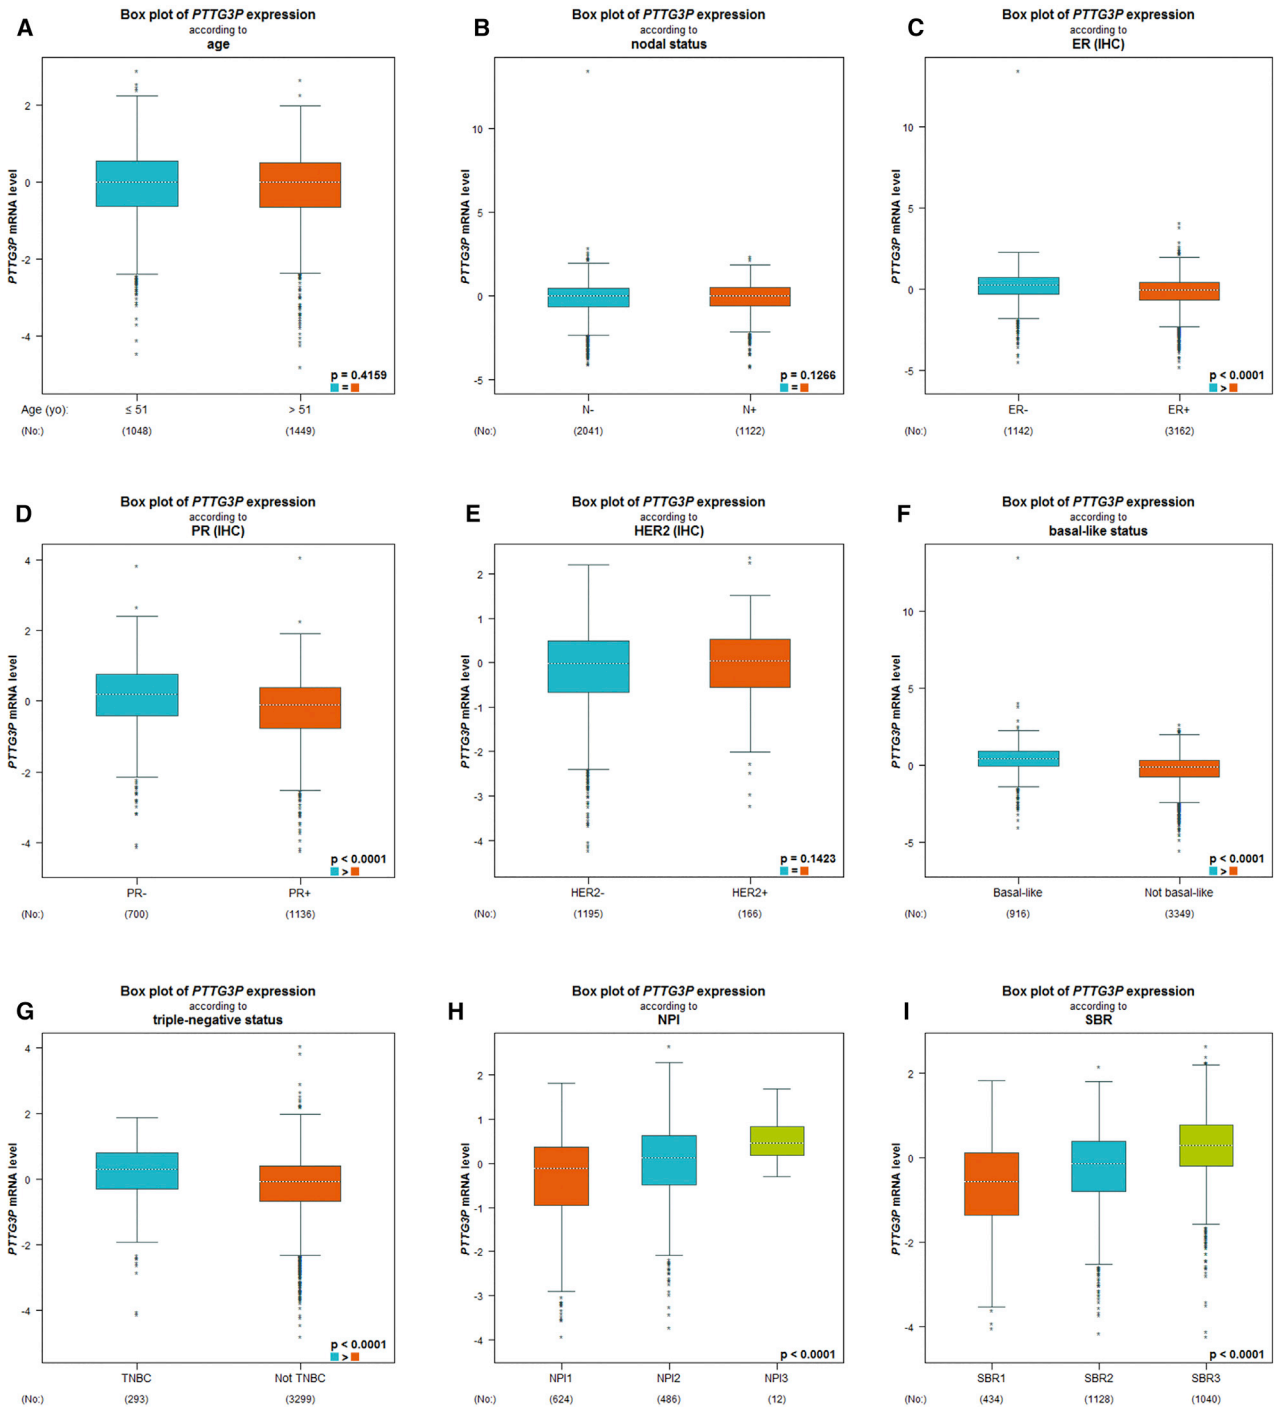

**Figure 2. Relationship between Expression of PTTG3P and Various Clinicopathological Parameters of Breast Cancer Determined by the bc-GenExMiner Database**

(A) Boxplot of PTTG3P expression according to age; (B) boxplot of PTTG3P expression according to nodal status; (C) boxplot of PTTG3P expression according to ER; (D) boxplot of PTTG3P expression according to PR; (E) boxplot of PTTG3P expression according to HER2; (F) boxplot of PTTG3P expression according to basal-like status; (G) boxplot of PTTG3P expression according to triple-negative status; (H) boxplot of PTTG3P expression according to NPI; and (I) boxplot of PTTG3P expression according to SBR.

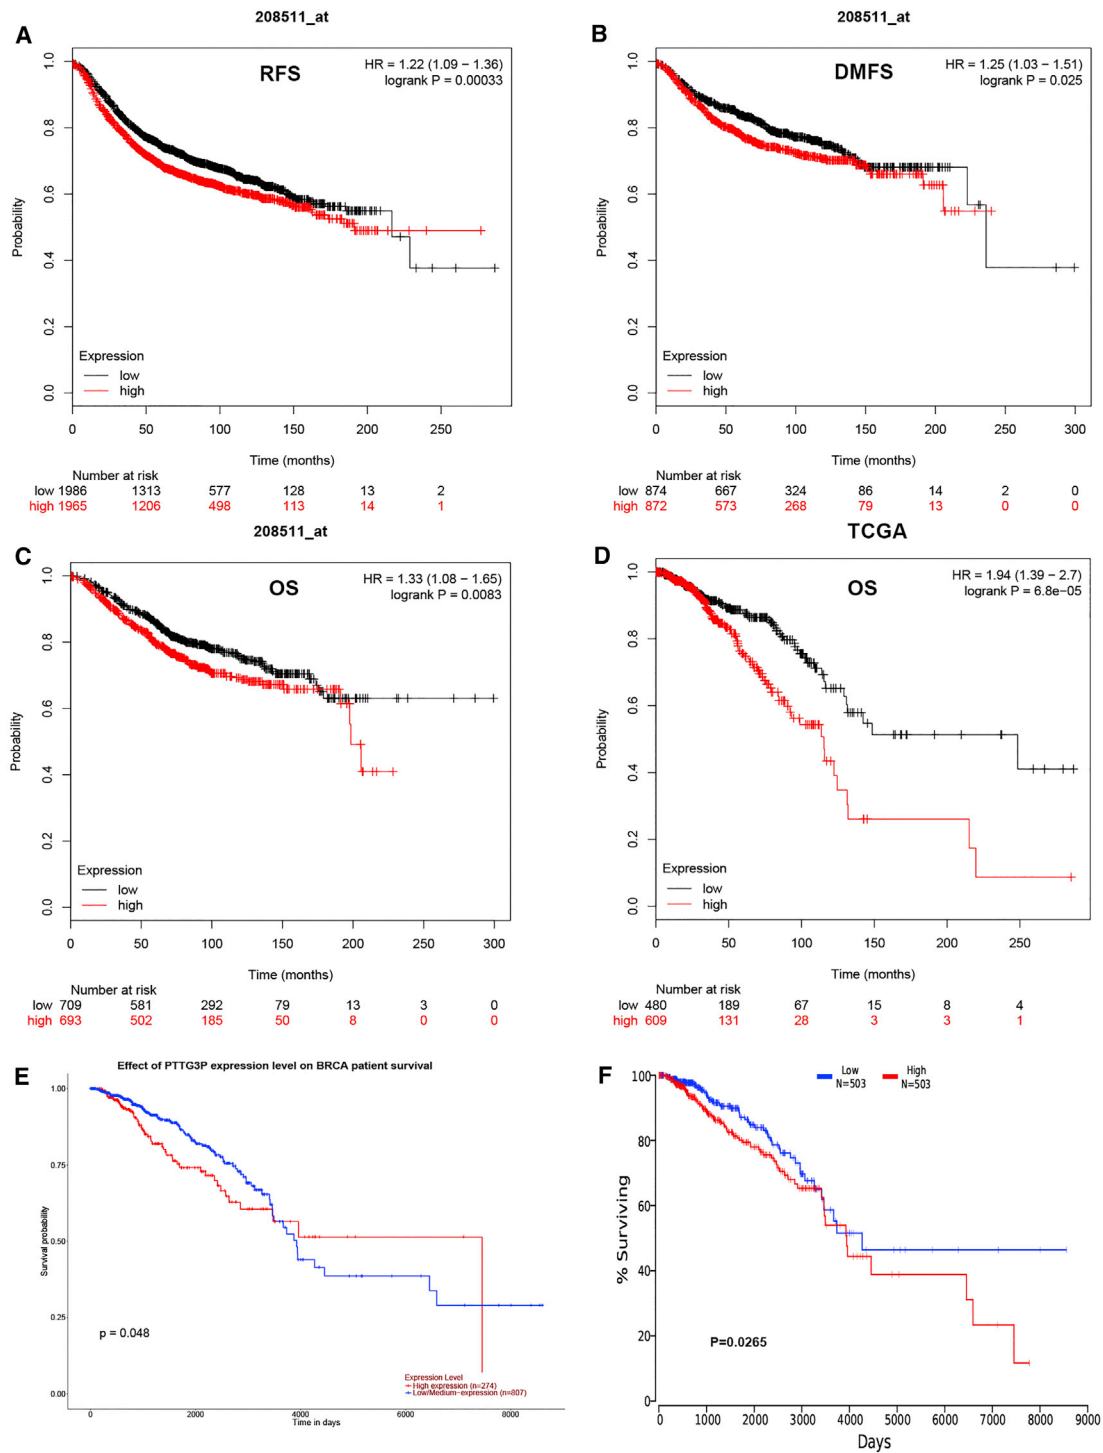

**Figure 3. Prognostic Value of PTTG3P in Breast Cancer**

(A) High expression of PTTG3P indicates a poor RFS of breast cancer (Kaplan-Meier Plotter database); (B) high expression of PTTG3P indicates a poor DMFS of breast cancer (Kaplan-Meier Plotter database); (C and D) high expression of PTTG3P indicates a poor OS of breast cancer (Kaplan-Meier Plotter database); (E) high expression of PTTG3P indicates a poor prognosis of breast cancer (UALCAN database); and (F) high expression of PTTG3P indicates a poor prognosis of breast cancer (OncoLnc database).

**A**

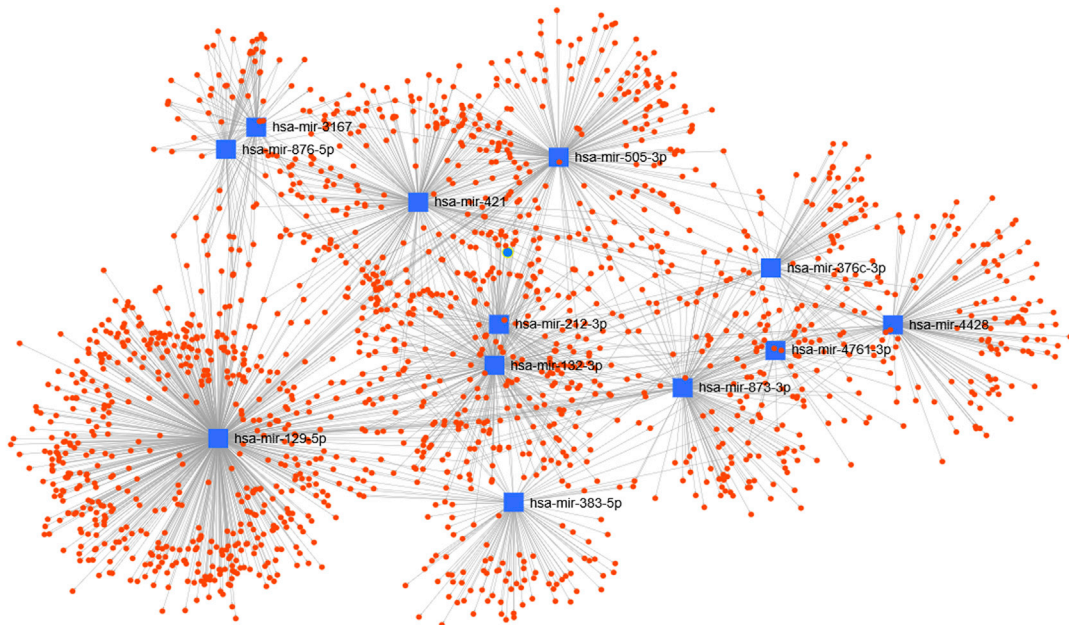

**B**

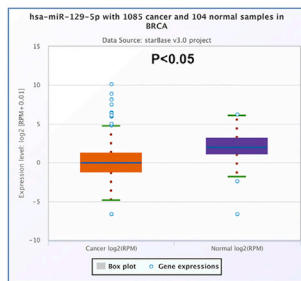

**C**

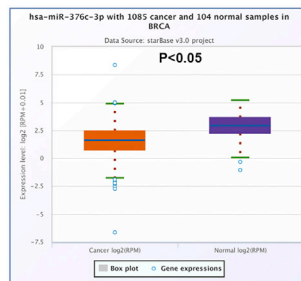

**D**

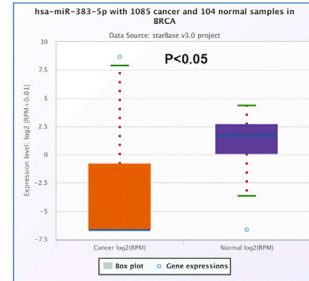

**E**

**GO: Biological Process**

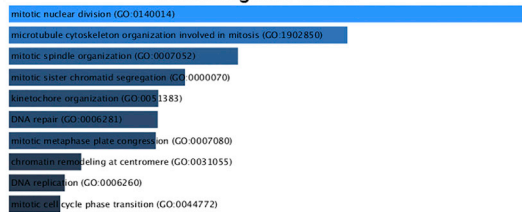

**F**

**GO: Cellular Component**

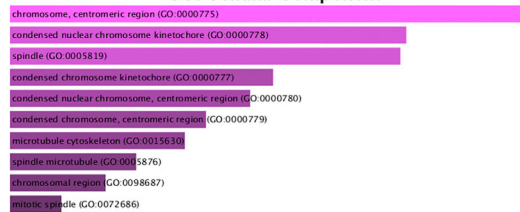

**G**

**GO: Molecular Function**

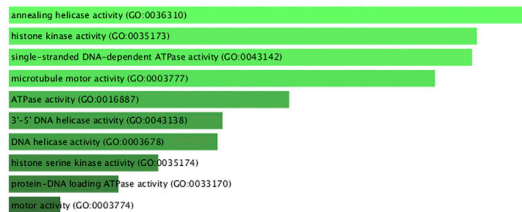

**H**

**KEGG Pathway**

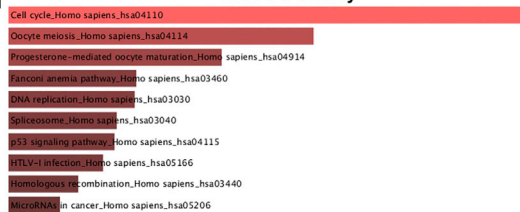

(legend on next page)

and molecular function (MF). As presented in Figures 4E–4G, the enriched GO functions for these co-expressed genes included mitotic nuclear division (GO:0140014), microtubule cytoskeleton organization involved in mitosis (GO:1902850), and mitotic spindle organization (GO:0007052) in the BP category; the chromosome, centromeric region (GO:0000775), condensed nuclear chromosome kinetochore (GO:0000778), and spindle (GO:0005819) in the CC category; and annealing helicase activity (GO:0036310), histone kinase activity (GO:0035173), and single-stranded DNA-dependent ATPase activity (GO:0043142) in the MF category. Subsequently, we conducted KEGG (Kyoto Encyclopedia of Genes and Genomes) pathway enrichment analysis (Figure 4E). The top 10 enriched KEGG pathways were cell cycle (hsa04110), oocyte meiosis (hsa04114), progesterone-mediated oocyte maturation (hsa04914), Fanconi anemia pathway (hsa03460), DNA replication (hsa03030), spliceosome (hsa03040), p53 signaling pathway (hsa04115), HTLV-I infection (hsa05166), homologous recombination (hsa03440), and microRNAs in cancer (hsa05206).

#### Relationship between Pseudogene PTTG3P and Its Parental Genes PTTG1 and -2

It has been well documented that pseudogenes can regulate their parental genes by multiple ways in the pathogenesis of human cancers.<sup>16,17</sup> PTTG1 and -2 are two parental genes of PTTG3P. The correlation of pseudogene PTTG3P and -1 or -2 was first analyzed using several databases, such as OncoPrint, bc-GenExMiner, cBioPortal, and UALCAN (Figure 5). As shown in Figures 5A, 5B, and S2, OncoPrint co-expression analysis indicated that PTTG1 and -2 ranked as the two top correlated genes among all correlated genes. Similar results were acquired by analytic data from bc-GenExMiner and cBioPortal, as presented in Figures 5C–5G. Data mining in the UALCAN database also confirmed a positive correlation of PTTG1 and -3P expression (Figure 5H). However, no significant expression association between PTTG3P and -2 was found. To confirm accuracy of these analytic results, experimental validation was further performed via detection of the expression levels of PTTG1 and -2 and assessment of the expression correlation of PTTG3P with PTTG1 and -2 in clinical breast cancer patients. As shown in Figure 6A, the expression level of PTTG1 in breast cancer samples was markedly higher than that in matched normal breast samples. A positive expression correlation of PTTG3P with PTTG1 was observed (Figure 6C). However, there was no significant difference in PTTG2 expression between tumor and normal tissues (Figure 6B). Figure 6D demonstrates that PTTG3P expression did not correlate significantly with PTTG2 expression. All these findings suggest a positive correlation of PTTG3P expression with PTTG1 expression, implying that

PTTG3P may promote breast cancer progression by upregulating PTTG1. However, it needs to be further validated by much more study.

#### DISCUSSION

Pseudogenes have long been dismissed as junk genes. However, in recent years, growing evidence has demonstrated key roles of pseudogenes in physiological and pathological processes. The dysregulation of pseudogenes has a close connection with human disorders, especially cancer.<sup>18–21</sup> Several cancer-associated pseudogenes have been identified, including PTENP1,<sup>22</sup> HMGA1P6, HMGA1P7,<sup>23</sup> POU5F1B,<sup>24</sup> FOXO3P,<sup>25</sup> and INTS6P1.<sup>26</sup> PTTG3P is a novel pseudogene, which has been found to be closely associated with the onset and progression of some types of human cancer, such as gastric cancer and hepatocellular carcinoma.<sup>14,15</sup> However, the expression pattern and potential roles of PTTG3P in breast cancer, as well as its underlying regulatory mechanisms, remain largely unknown.

In this study, we first determined the expression level of PTTG3P in breast cancer, based on bioinformatics analyses and experimental validation. The SAGE Digital Gene Expression Display showed no macroscopic differences in the expression of PTTG3P in the cancer and normal groups, partially because of the gene's extremely low overall expression. OncoPrint analysis revealed that expression of PTTG3P in breast cancer tissues was significantly higher than that in normal tissues. qRT-PCR for clinical samples also demonstrated a high expression level of PTTG3P in breast cancer tissues when compared with their matched normal tissues. Moreover, a negative association between PTTG3P expression and ER and PR status was found. Conversely, basal-like status, TNBC status, NPI, or SBR grade was positively linked to PTTG3P expression. Subsequently, the Kaplan-Meier Plotter, UALCAN, and OncoPrint databases were used to study the prognostic role of PTTG3P in breast cancer, and the analytic results displayed that high expression of PTTG3P indicated poor RFS, OS, and DMFS. These findings suggest that increased expression of PTTG3P may be a promising prognostic biomarker in breast cancer.

Pseudogenes exert their functions in three levels, including DNA, RNA, and protein by a variety of mechanisms, involving gene conversion, homologous recombination, exonization, insertional mutations, and serving as antisense RNAs, endo-siRNAs, or competing endogenous RNAs.<sup>4</sup> To explore the potential regulatory mechanisms of PTTG3P, we first constructed a pseudogene-miRNA-mRNA interaction network. In this network, 12 potential miRNAs were identified as candidates for PTTG3P and 1,713 target genes for the identified

#### Figure 4. Construction of PTTG3P-miRNA-mRNA Network and Gene Ontology Functional Annotation and KEGG Pathway Enrichment Analysis for the Co-expressed Genes of PTTG3P

(A) The potential pseudogene PTTG3P-miRNA-mRNA regulatory network; (B) expression of miR-129-5p in breast cancer tissues and normal controls determined by starBase v3.0; (C) expression of miR-376c-3p in breast cancer tissues and normal controls determined by starBase v3.0; (D) expression of miR-383-5p in breast cancer tissues and normal controls determined by starBase v3.0; (E) the top 10 enriched biological process (BP) items for the co-expressed genes of PTTG3P; (F) the top 10 enriched cellular component (CC) items for the co-expressed genes of PTTG3P; (G) the top 10 enriched molecular function (MF) items for the co-expressed genes of PTTG3P; and (H) the top 10 enriched KEGG pathway items for the co-expressed genes of PTTG3P.

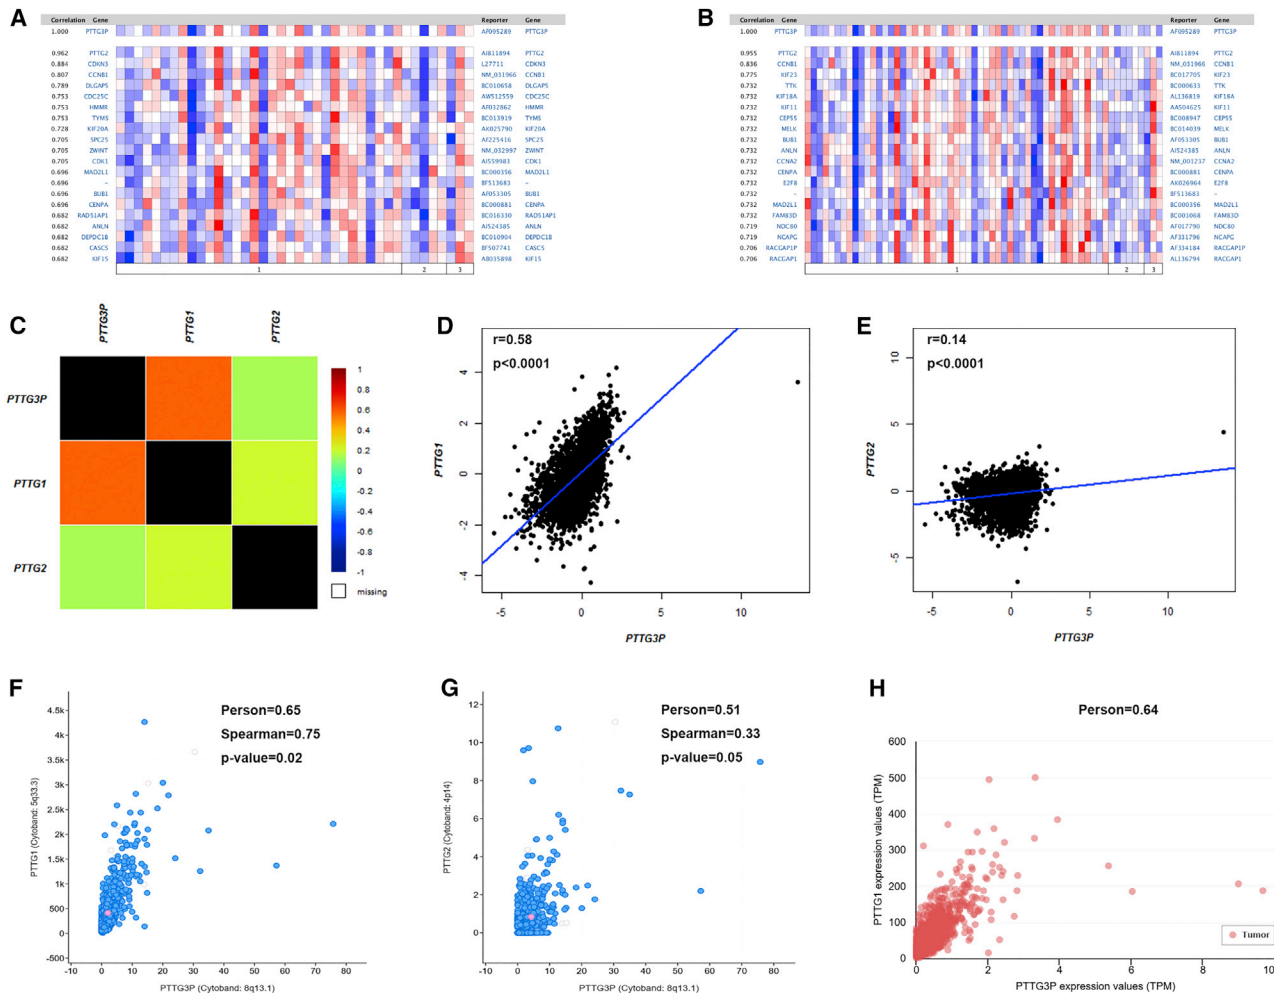

**Figure 5. Expression Correlation of PTTG3 with Parental Genes Analyzed by Oncomine, bc-GenExMiner, cBioPortal, and UALCAN Databases**

(A and B) PTTG3P co-expression of genes analyzed using Oncomine database; (C–E) expression relationship between PTTG3P and PTTG1/PTTG2 in breast cancer analyzed using bc-GenExMiner database; (F and G) expression correlation between PTTG3P and PTTG1/PTTG2 in breast cancer analyzed using cBioPortal database; and (H) expression correlation between PTTG3P and -1 in breast cancer analyzed using the UALCAN database.

miRNAs were finally predicted. Next, we further determined the expression levels of the 12 potential miRNAs in breast cancer and found that 3 of 12 (miR-129-5p, miR-376c-3p, and miR-383-5p) miRNAs were significantly downregulated in breast cancer. According to the ceRNA hypothesis, the three miRNAs may be three downstream miRNAs. Moreover, previous studies have confirmed that all three miRNAs function as tumor suppressors in various types of human cancers, including breast cancer.<sup>27–31</sup> Co-expression analysis may also provide critical clues for investigating the mechanisms of PTTG3P. UALCAN database analysis acquired 220 positively correlated genes. Functional annotation and KEGG pathway enrichment analysis showed that the co-expressed genes were mainly enriched in nuclear division, cell cycle, and oocyte meiosis. Therefore, we supposed that PTTG3P exerted its roles in cancer by these biological processes.

Numerous studies have suggested that pseudogenes can regulate their parental genes and thereby are involved in different cellular processes.<sup>16</sup> PTTG1 and -2 are two parental genes of PTTG3P. It has been well documented that PTTG1 and -2 act as two oncogenes in multiple human cancers.<sup>12,32,33</sup> We found that PTTG3P expression was significantly positively correlated with PTTG1 expression in the Oncomine, bc-GenExMiner, cBioPortal, and UALCAN databases, but was markedly associated with PTTG2 expression only in the Oncomine and bc-GenExMiner databases. The correlation of PTTG3P with PTTG1 or -2 was further assessed in clinical samples. The results revealed that PTTG3P correlated positively only with PTTG1. Previous studies have suggested that PTTG1 exerts oncogenic roles mainly by regulating the cell cycle.<sup>15,33</sup> These findings and the present results provide ample evidence that PTTG3P may promote breast cancer progression through modulation of cell



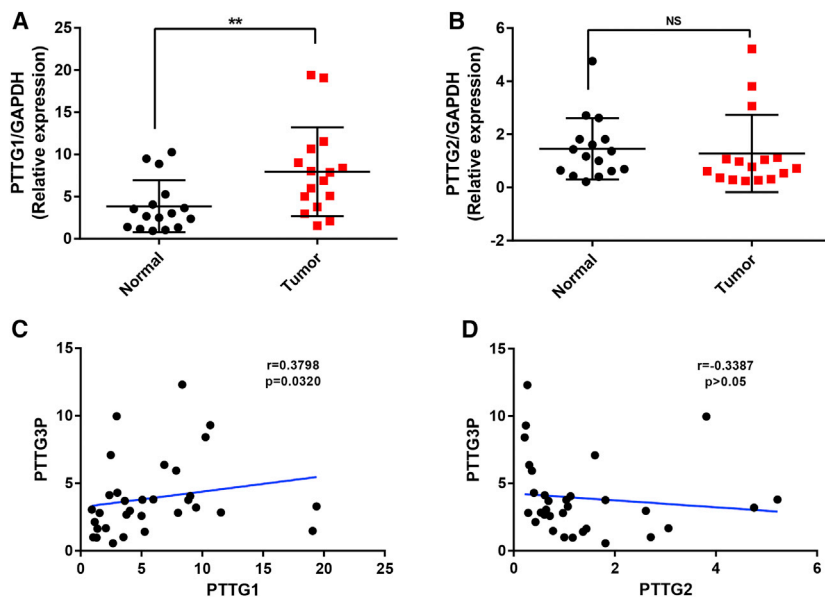

**Figure 6. Expression of PTTG1/PTTG2 and Correlation between PTTG3P Expression and PTTG1/PTTG2 Expression in Clinical Breast Cancer Samples**

(A) The level of PTTG1 was detected in 16 breast cancer tissues and paired non-tumor tissues by qRT-PCR; (B) the level of PTTG2 was detected in 16 breast cancer tissues and paired non-tumor tissues by qRT-PCR; (C) the correlation of PTTG3P with PTTG1 in the 32 clinical samples; (D) the correlation of PTTG3P with PTTG2 in the 32 clinical samples. Error bars represent SD. \*\* $p < 0.01$ ; ns represents no significance.

cycle-associated processes by partially upregulating expression of its parental genes, especially PTTG1.

Altogether, based on bioinformatics analysis and experimental validation (Figure 7), we provided a reliable integrated analysis of the pseudogene PTTG3P expression pattern, prognostic value, and potential regulatory mechanisms in breast cancer. In this study, high expression of pseudogene PTTG3P in breast cancer was confirmed, and increased expression of PTTG3P indicated a poor prognosis of breast cancer. Furthermore, a potential pseudogene PTTG3P-miRNA-mRNA regulatory network was constructed, and the three most possible downstream miRNAs (miR-129-5p, miR-376c-3p, and miR-383-5p) of PTTG3P were identified. Our findings also supported that PTTG3P may upregulate PTTG1 expression, thus functioning as an oncogene in breast cancer. In summary, pseudogene PTTG3P may serve as a novel prognostic biomarker and a therapeutic target for patients with breast cancer. In the future, more laboratory experiments and clinical trials need to be performed to further validate the findings in this study.

## MATERIALS AND METHODS

### Expression Profile Analysis Using Serial Analysis of Gene Expression and OncoPrint

The expression profile of pseudogene PTTG3P was analyzed with two online databases, including SAGE and OncoPrint. First, all available published SAGE data were used to analyze PTTG3P expression in 23 normal human tissues and corresponding malignant counterparts, and PTTG3P expression profile was displayed using the SAGE Anatomic Viewer (<http://cgap.nci.nih.gov/SAGE/AnatomicViewer/>). We also determined the PTTG3P expression profile using OncoPrint, which is a cancer microarray database and an integrated data-mining platform, to facilitate discovery

was also used to perform a co-expression analysis of PTTG3P and other genes.

### Breast Cancer Gene-Expression Miner

Breast cancer gene-expression miner (bc-GenExMiner), a statistical mining tool of published annotated genomic data, was introduced to assess the correlation of pseudogene PTTG3P expression level with specific clinicopathological features of breast cancer, including age, nodal status, hormonal receptors status (ER and PR), HER2, pathological subtype, NPI, and SBR grade.<sup>35,36</sup> bc-GenExMiner was also used to determine the expression correlation of PTTG3P with PTTG1 and 2.  $p < 0.05$  was considered statistically significant.

### Survival Analysis Using Kaplan-Meier Plotter, UALCAN, and OncoLnc Databases

The Kaplan-Meier Plotter (<http://kmplot.com/analysis/>), an online database established from gene expression data and survival information of cancer patients downloaded from the Gene Expression Omnibus (GEO) database, was used to evaluate the prognostic value of PTTG3P in breast cancer.<sup>37</sup> PTTG3P was first entered into the database. A Kaplan-Meier survival plot, hazards ratio (HR), 95% confidence interval (CI), and log rank  $p$  were directly determined and displayed on the webpage. A log rank  $p < 0.05$  was considered statistically significant.

UALCAN (<http://ualcan.path.uab.edu/index.html/>) is a portal for facilitating tumor subgroup gene expression and survival analyses, providing easy access to publicly available cancer transcriptome data containing TCGA.<sup>38</sup> It was employed to evaluate the effect of PTTG3P on breast cancer patient survival.  $p < 0.05$  was considered statistically significant.

OncoLnc (<http://www.oncolnc.org/>), a database for interactively investigating survival correlations and retrieving clinical data associated

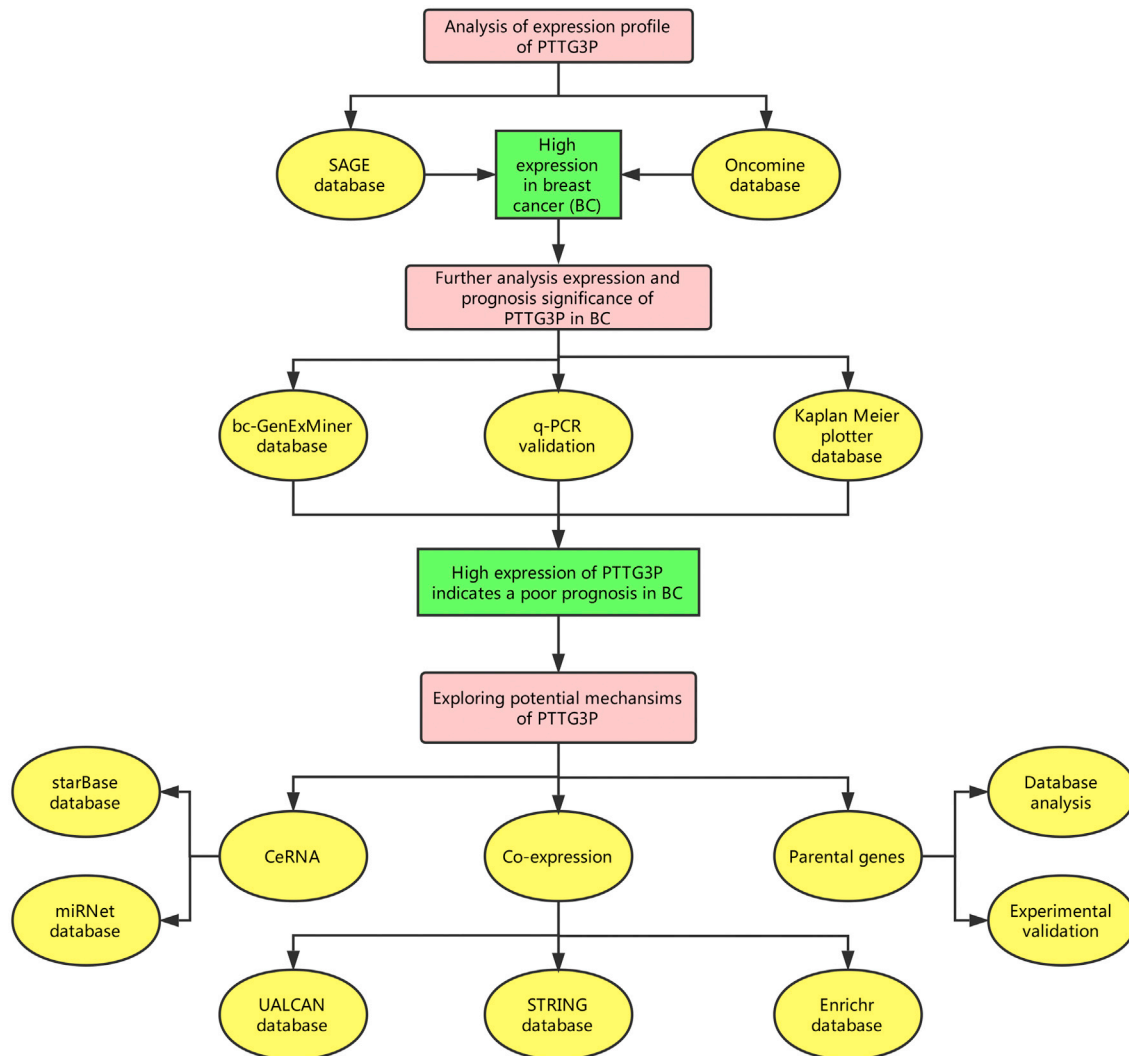

**Figure 7. The Visual Flow-Process Diagram of This Study**

with expression data for mRNAs, miRNAs, long non-coding RNAs, and pseudogenes, was also used to assess the prognostic value of PTTG3P in breast cancer.<sup>6</sup>  $p < 0.05$  was considered statistically significant.

#### **Construction of the Pseudogene-miRNA-mRNA Regulatory Network**

The pseudogene PTTG3P-miRNA-mRNA regulatory network was constructed. First, starBase v3.0 (<http://starbase.sysu.edu.cn/>) was employed to identify potential miRNAs binding to pseudogene PTTG3P.<sup>39</sup> Subsequently, target genes for identified miRNAs were predicted using the miRNet database (<https://www.mirnet.ca/>), which is an easy-to-use tool for comprehensive statistical analysis and functional interpretation of data from miRNAs studies.<sup>40</sup> Expression levels of the potential miRNAs in breast cancer were also detected

by starBase v3.0 (<http://starbase.sysu.edu.cn/>).  $p < 0.05$  was considered statistically significant.

#### **Co-expression Analysis**

Those genes co-expressed with pseudogene PTTG3P were analyzed using UALCAN.<sup>41</sup> Genes positively correlated with PTTG3P in breast cancer were downloaded from UALCAN. Genes with extremely low expression (median transcripts per million  $< 0.5$ ) were filtered out, and only genes with a Pearson correlation coefficient  $\geq 0.3$  were included.

#### **Protein-Protein Interaction Network**

Protein-protein interaction network for the co-expressed genes was established using STRING v10.5 (<https://string-db.org/cgi/input.pl/>), which is a database of predicted functional associations between

proteins.<sup>42</sup> The network displayed on the webpage was gathered into three clusters and then exported as a high-resolution bitmap.

#### Gene Ontology and KEGG Pathway Enrichment Analysis

The Enrichr database (<http://amp.pharm.mssm.edu/Enrichr/>) was employed to perform GO functional annotation and KEGG pathway enrichment analysis for these co-expressed genes.<sup>43</sup> GO functional analysis contained three categories, including BP, CC, and MF. The bar charts of GO and KEGG analysis for these co-expressed genes were directly downloaded from the webpage.

#### cBioPortal Database Analysis

In addition to using the OncoPrint, bc-GenExMiner, and UALCAN databases mentioned above, we conducted a correlation analysis of pseudogene PTTG3P and its parental gene PTTG1 and -2 using the cBioPortal database (<http://www.cbioportal.org/>).<sup>44</sup>  $p < 0.05$  was considered statistically significant.

#### Gathering of Clinical Samples and Ethics Statement

Altogether, 50 clinical breast cancer tissues and matched normal tissues were collected from the Zhejiang Cancer Hospital (Hangzhou, China). All the samples were kept in liquid nitrogen until the extraction of RNA. Written informed consent for the biological experiments was obtained from every patient involved in the study, and the study was approved by the Ethics Committee of the Zhejiang Cancer Hospital.

#### RNA Extraction and qRT-PCR Analysis

RNA extraction and qRT-PCR were performed as described previously.<sup>38,45,46</sup> The primers used in this study were purchased from Ribobio (Guangzhou, China) and are listed in Table S5.

#### Statistical Analysis

Each experiment was performed in triplicate and repeated at least three times. GraphPad Prism Software, Version 7, was introduced to conduct statistical analysis. The statistical significance of the differences between two groups was estimated by two-tailed Student's *t* test. Spearman correlation coefficients were calculated to evaluate the association between PTTG3P and -1 or -2.

#### SUPPLEMENTAL INFORMATION

Supplemental Information can be found online at <https://doi.org/10.1016/j.omto.2019.03.006>.

#### AUTHOR CONTRIBUTIONS

Conceptualization, W.L. and W.F.; methodology, W.L. and B.D.; software, W.L. and B.D.; writing of the original draft, W.L.; writing review and editing, W.L., B.D. and W.F.; and funding acquisition, W.F.

#### CONFLICTS OF INTEREST

The authors declare no competing interests.

#### ACKNOWLEDGMENTS

The authors would like to acknowledge financial support for this work from grants NNSF-81372462 and NNSF-81572987.

#### REFERENCES

- Cui, X., Yi, Q., Jing, X., Huang, Y., Tian, J., Long, C., Xiang, Z., Tan, B., Li, Y., Zhu, J., et al. (2018). Mining Prognostic Significance of MEG3 in Human Breast Cancer Using Bioinformatics Analysis. *Cell. Physiol. Biochem.* 50, 41–51.
- DeSantis, C.E., Ma, J., Goding Sauer, A., Newman, L.A., and Jemal, A. (2017). Breast cancer statistics, 2017, racial disparity in mortality by state. *CA Cancer J. Clin.* 67, 439–448.
- Sasidharan, R., and Gerstein, M. (2008). Genomics: protein fossils live on as RNA. *Nature* 453, 729–731.
- Xiao-Jie, L., Ai-Mei, G., Li-Juan, J., and Jiang, X. (2015). Pseudogene in cancer: real functions and promising signature. *J. Med. Genet.* 52, 17–24.
- Chen, B., Wang, C., Zhang, J., Zhou, Y., Hu, W., and Guo, T. (2018). New insights into long noncoding RNAs and pseudogenes in prognosis of renal cell carcinoma. *Cancer Cell Int.* 18, 157.
- Saha, S.K., Jeong, Y., Cho, S., and Cho, S.G. (2018). Systematic expression alteration analysis of master reprogramming factor OCT4 and its three pseudogenes in human cancer and their prognostic outcomes. *Sci. Rep.* 8, 14806.
- Song, H., Yang, J., Zhang, Y., Zhou, J., Li, Y., and Hao, X. (2019). Integrated analysis of pseudogene RP11-564D11.3 expression and its potential roles in hepatocellular carcinoma. *Epigenomics* 11, 267–280.
- Chen, L., Puri, R., Lefkowitz, E.J., and Kakar, S.S. (2000). Identification of the human pituitary tumor transforming gene (hPTTG) family: molecular structure, expression, and chromosomal localization. *Gene* 248, 41–50.
- Repo, H., Gurvits, N., Löytyniemi, E., Nykänen, M., Lintunen, M., Karra, H., Kurki, S., Kuopio, T., Talvinen, K., Söderström, M., and Kronqvist, P. (2017). PTTG1-interacting protein (PTTG1IP/PBF) predicts breast cancer survival. *BMC Cancer* 17, 705.
- Xie, Y., and Wang, B. (2016). Pttg1 Promotes Growth of Breast Cancer through P27 Nuclear Exclusion. *Cell. Physiol. Biochem* 38, 393–400.
- Mirandola, L., Figueroa, J.A., Phan, T.T., Grizzi, F., Kim, M., Rahman, R.L., Jenkins, M.R., Cobos, E., Jumper, C., Alalawi, R., and Chiriva-Internati, M. (2015). Novel antigens in non-small cell lung cancer: SP17, AKAP4, and PTTG1 are potential immunotherapeutic targets. *Oncotarget* 6, 2812–2826.
- Fu, D., Zhang, Y., and Cui, H. (2018). Long noncoding RNA CCAT2 is activated by E2F1 and exerts oncogenic properties by interacting with PTTG1 in pituitary adenomas. *Am. J. Cancer Res.* 8, 245–255.
- Feng, W., Xiaoyan, X., Shenglei, L., Hongtao, L., and Guozhong, J. (2017). PTTG1 cooperated with GLI1 leads to epithelial-mesenchymal transition in esophageal squamous cell cancer. *Oncotarget* 8, 92388–92400.
- Weng, W., Ni, S., Wang, Y., Xu, M., Zhang, Q., Yang, Y., Wu, Y., Xu, Q., Qi, P., Tan, C., et al. (2017). PTTG3P promotes gastric tumour cell proliferation and invasion and is an indicator of poor prognosis. *J. Cell. Mol. Med.* 21, 3360–3371.
- Huang, J.L., Cao, S.W., Ou, Q.S., Yang, B., Zheng, S.H., Tang, J., Chen, J., Hu, Y.W., Zheng, L., and Wang, Q. (2018). The long non-coding RNA PTTG3P promotes cell growth and metastasis via up-regulating PTTG1 and activating PI3K/AKT signaling in hepatocellular carcinoma. *Mol. Cancer* 17, 93.
- An, Y., Furber, K.L., and Ji, S. (2017). Pseudogenes regulate parental gene expression via ceRNA network. *J. Cell. Mol. Med.* 21, 185–192.
- Poliseno, L. (2012). Pseudogenes: newly discovered players in human cancer. *Sci. Signal.* 5, re5.
- De Martino, M., Forzati, F., Arra, C., Fusco, A., and Esposito, F. (2016). HMGA1-pseudogenes and cancer. *Oncotarget* 7, 28724–28735.
- Han, L., Yuan, Y., Zheng, S., Yang, Y., Li, J., Edgerton, M.E., Diao, L., Xu, Y., Verhaak, R.G.W., and Liang, H. (2014). The Pan-Cancer analysis of pseudogene expression reveals biologically and clinically relevant tumour subtypes. *Nat. Commun.* 5, 3963.
- Hu, X., Yang, L., and Mo, Y.Y. (2018). Role of Pseudogenes in Tumorigenesis. *Cancers (Basel)* 10, 256.
- Tutar, L., Özgür, A., and Tutar, Y. (2018). Involvement of miRNAs and Pseudogenes in Cancer. *Methods Mol. Biol.* 1699, 45–66.
- Yu, G., Yao, W., Gumireddy, K., Li, A., Wang, J., Xiao, W., Chen, K., Xiao, H., Li, H., Tang, K., et al. (2014). Pseudogene PTENP1 functions as a competing endogenous

- RNA to suppress clear-cell renal cell carcinoma progression. *Mol. Cancer Ther.* 13, 3086–3097.
23. Esposito, F., De Martino, M., D'Angelo, D., Mussnich, P., Raverot, G., Jaffrain-Rea, M.L., Frassetto, F., Trouillas, J., and Fusco, A. (2015). HMGA1-pseudogene expression is induced in human pituitary tumors. *Cell Cycle* 14, 1471–1475.
  24. Hayashi, H., Arai, T., Togashi, Y., Kato, H., Fujita, Y., De Velasco, M.A., Kimura, H., Matsumoto, K., Tanaka, K., Okamoto, I., et al. (2015). The OCT4 pseudogene POU5F1B is amplified and promotes an aggressive phenotype in gastric cancer. *Oncogene* 34, 199–208.
  25. Yang, W., Du, W.W., Li, X., Yee, A.J., and Yang, B.B. (2016). Foxo3 activity promoted by non-coding effects of circular RNA and Foxo3 pseudogene in the inhibition of tumor growth and angiogenesis. *Oncogene* 35, 3919–3931.
  26. Peng, H., Ishida, M., Li, L., Saito, A., Kamiya, A., Hamilton, J.P., Fu, R., Oлару, A.V., An, F., Popescu, I., et al. (2015). Pseudogene INTS6P1 regulates its cognate gene INTS6 through competitive binding of miR-17-5p in hepatocellular carcinoma. *Oncotarget* 6, 5666–5677.
  27. Deng, Y., Xiong, Y., and Liu, Y. (2016). miR-376c inhibits cervical cancer cell proliferation and invasion by targeting BMI1. *Int. J. Exp. Pathol.* 97, 257–265.
  28. Jiang, J., Xie, C., Liu, Y., Shi, Q., and Chen, Y. (2019). Up-regulation of miR-383-5p suppresses proliferation and enhances chemosensitivity in ovarian cancer cells by targeting TRIM27. *Biomed. Pharmacother.* 109, 595–601.
  29. Meng, R., Fang, J., Yu, Y., Hou, L.K., Chi, J.R., Chen, A.X., Zhao, Y., and Cao, X.C. (2018). miR-129-5p suppresses breast cancer proliferation by targeting CBX4. *Neoplasia* 65, 572–578.
  30. Xiao, G., Li, X., Li, G., Zhang, B., Xu, C., Qin, S., Du, N., Wang, J., Tang, S.C., Zhang, J., et al. (2017). MiR-129 blocks estrogen induction of NOTCH signaling activity in breast cancer stem-like cells. *Oncotarget* 8, 103261–103273.
  31. Zeng, H., Wang, L., Wang, J., Chen, T., Li, H., Zhang, K., Chen, J., Zhen, S., Tuluhong, D., Li, J., and Wang, S. (2018). microRNA-129-5p suppresses Adriamycin resistance in breast cancer by targeting SOX2. *Arch. Biochem. Biophys.* 651, 52–60.
  32. Guo, Y., Shao, Y., Chen, J., Xu, S., Zhang, X., and Liu, H. (2016). Expression of pituitary tumor-transforming 2 in human glioblastoma cell lines and its role in glioblastoma tumorigenesis. *Exp. Ther. Med.* 11, 1847–1852.
  33. Zhi, T., Jiang, K., Xu, X., Yu, T., Wu, W., Nie, E., Zhou, X., Jin, X., Zhang, J., Wang, Y., and Liu, N. (2017). MicroRNA-520d-5p inhibits human glioma cell proliferation and induces cell cycle arrest by directly targeting PTTG1. *Am. J. Transl. Res.* 9, 4872–4887.
  34. Rhodes, D.R., Yu, J., Shanker, K., Deshpande, N., Varambally, R., Ghosh, D., Barrette, T., Pandey, A., and Chinnaiyan, A.M. (2004). ONCOMINE: a cancer microarray database and integrated data-mining platform. *Neoplasia* 6, 1–6.
  35. Jézéquel, P., Campone, M., Gouraud, W., Guérin-Charbonnel, C., Leux, C., Ricolleau, G., and Campion, L. (2012). bc-GenExMiner: an easy-to-use online platform for gene prognostic analyses in breast cancer. *Breast Cancer Res. Treat.* 131, 765–775.
  36. Jezequel, P., Frenel, J.S., Campion, L., Guerin-Charbonnel, C., Gouraud, W., Ricolleau, G., and Campone, M. (2013). bc-GenExMiner 3.0: new mining module computes breast cancer gene expression correlation analyses. *Database* 2013, bas060.
  37. Györfy, B., Surowiak, P., Budczies, J., and Lánckzy, A. (2013). Online survival analysis software to assess the prognostic value of biomarkers using transcriptomic data in non-small-cell lung cancer. *PLoS ONE* 8, e82241.
  38. Lou, W., Chen, J., Ding, B., Chen, D., Zheng, H., Jiang, D., Xu, L., Bao, C., Cao, G., and Fan, W. (2018). Identification of invasion-metastasis-associated microRNAs in hepatocellular carcinoma based on bioinformatic analysis and experimental validation. *J. Transl. Med.* 16, 266.
  39. Li, J.H., Liu, S., Zhou, H., Qu, L.H., and Yang, J.H. (2014). starBase v2.0: decoding miRNA-ceRNA, miRNA-ncRNA and protein-RNA interaction networks from large-scale CLIP-Seq data. *Nucleic Acids Res.* 42, D92–D97.
  40. Fan, Y., Siklenka, K., Arora, S.K., Ribeiro, P., Kimmins, S., and Xia, J. (2016). miRNet: dissecting miRNA-target interactions and functional associations through network-based visual analysis. *Nucleic Acids Res.* 44, W135–W141.
  41. Chandrashekar, D.S., Bashel, B., Balasubramanya, S.A.H., Creighton, C.J., Ponce-Rodriguez, I., Chakravarthi, B.V.S.K., and Varambally, S. (2017). UALCAN: A Portal for Facilitating Tumor Subgroup Gene Expression and Survival Analyses. *Neoplasia* 19, 649–658.
  42. Szklarczyk, D., Franceschini, A., Kuhn, M., Simonovic, M., Roth, A., Minguéz, P., Doerks, T., Stark, M., Müller, J., Bork, P., et al. (2011). The STRING database in 2011: functional interaction networks of proteins, globally integrated and scored. *Nucleic Acids Res.* 39, D561–D568.
  43. Kuleshov, M.V., Jones, M.R., Rouillard, A.D., Fernandez, N.F., Duan, Q., Wang, Z., Koplev, S., Jenkins, S.L., Jagodnik, K.M., Lachmann, A., et al. (2016). Enrichr: a comprehensive gene set enrichment analysis web server 2016 update. *Nucleic Acids Res.* 44, W90–W97.
  44. Cerami, E., Gao, J., Dogrusoz, U., Gross, B.E., Sumer, S.O., Aksoy, B.A., Jacobsen, A., Byrne, C.J., Heuer, M.L., Larsson, E., et al. (2012). The cBio cancer genomics portal: an open platform for exploring multidimensional cancer genomics data. *Cancer Discov.* 2, 401–404.
  45. Lou, W., Liu, J., Ding, B., Chen, D., Xu, L., Ding, J., Jiang, D., Zhou, L., Zheng, S., and Fan, W. (2019). Identification of potential miRNA-mRNA regulatory network contributing to pathogenesis of HBV-related HCC. *J. Transl. Med.* 17, 7.
  46. Lou, W., Liu, J., Ding, B., Xu, L., and Fan, W. (2018). Identification of chemoresistance-associated miRNAs in breast cancer. *Cancer Manag. Res.* 10, 4747–4757.

**OMTO, Volume 14**

**Supplemental Information**

**High Expression of Pseudogene PTTG3P Indicates  
a Poor Prognosis in Human Breast Cancer**

**Weiyang Lou, Bisha Ding, and Weimin Fan**

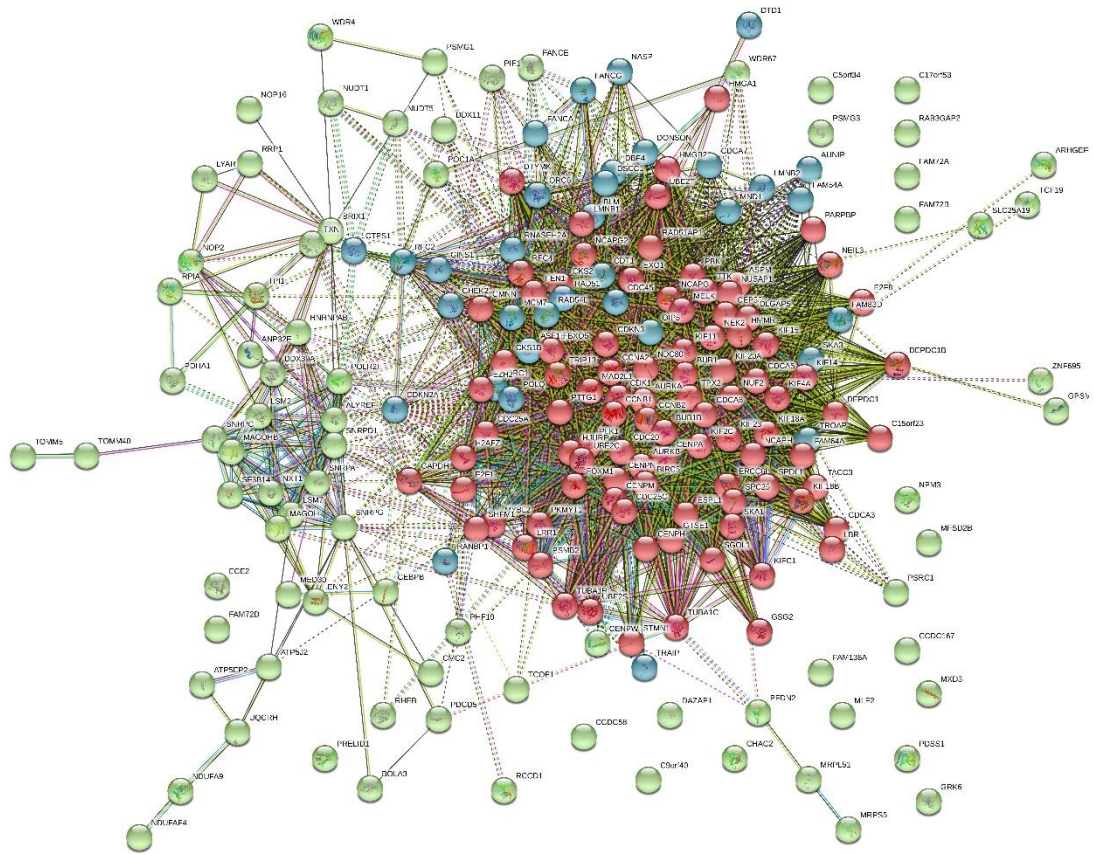

Figure S1. The protein-protein interaction network of the co-expressed genes of PTTG3P constructed by STRING V10.5.

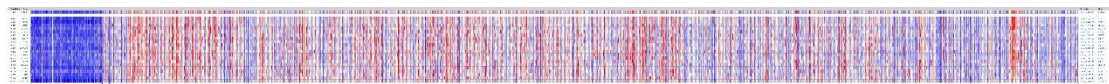

Figure S2. PTTG3P co-expression of genes analyzed using Oncomine database.

Table S1. The relationship between PTTG3P expression and different clinicopathological parameters of breast carcinoma.

| Variables    | Number | PTTG3P          |         |
|--------------|--------|-----------------|---------|
|              |        | mRNA expression | P-value |
| Age          |        |                 | 0.4159  |
| ≤ 51         | 1048   | -               |         |
| > 51         | 1449   | -               |         |
| Nodal Status |        |                 | 0.1266  |
| -            | 2041   | -               |         |
| +            | 1122   | -               |         |
| ER           |        |                 | <0.0001 |
| -            | 1142   | Up              |         |
| +            | 3162   | -               |         |
| PR           |        |                 | <0.0001 |
| -            | 700    | Up              |         |

|                        |      |    |                   |
|------------------------|------|----|-------------------|
| +                      | 1136 | -  |                   |
| HER2                   |      |    | 0.1423            |
| -                      | 1195 | -  |                   |
| +                      | 166  | -  |                   |
| Basal-like Status      |      |    | <b>&lt;0.0001</b> |
| Not                    | 3349 | -  |                   |
| Basal-like             | 916  | Up |                   |
| Triple-negative Status |      |    | <b>&lt;0.0001</b> |
| Not                    | 3299 | -  |                   |
| TNBC                   | 293  | Up |                   |
| NPI                    |      |    | <b>&lt;0.0001</b> |
| 1                      | 624  | -  |                   |
| 2                      | 486  | Up |                   |
| 3                      | 12   | Up |                   |
| SBR                    |      |    | <b>&lt;0.0001</b> |
| 1                      | 434  | -  |                   |
| 2                      | 1128 | Up |                   |
| 3                      | 1040 | Up |                   |

Table S2. The potential miRNA-target gene pairs predicted by miRNet.

| miRNA          | Gene    |
|----------------|---------|
| hsa-mir-129-5p | HBS1L   |
| hsa-mir-129-5p | SH3BP2  |
| hsa-mir-129-5p | SIX1    |
| hsa-mir-129-5p | SLC4A1  |
| hsa-mir-129-5p | SLC16A1 |
| hsa-mir-129-5p | SUMO2   |
| hsa-mir-129-5p | SNX2    |
| hsa-mir-129-5p | SOX4    |
| hsa-mir-129-5p | SOX12   |
| hsa-mir-129-5p | SP1     |
| hsa-mir-129-5p | STAR    |
| hsa-mir-129-5p | ADAM17  |
| hsa-mir-129-5p | TAGLN   |
| hsa-mir-129-5p | TAPBP   |
| hsa-mir-129-5p | TDGF1P3 |
| hsa-mir-129-5p | TEAD3   |
| hsa-mir-129-5p | TERF2   |
| hsa-mir-129-5p | NR2F2   |
| hsa-mir-129-5p | THRB    |
| hsa-mir-129-5p | TRAF3   |
| hsa-mir-129-5p | TRPS1   |
| hsa-mir-129-5p | TWIST1  |
| hsa-mir-129-5p | UBE2G2  |

|                |           |
|----------------|-----------|
| hsa-mir-129-5p | UBE2V2    |
| hsa-mir-129-5p | VIM       |
| hsa-mir-129-5p | VLDLR     |
| hsa-mir-129-5p | WEE1      |
| hsa-mir-129-5p | YES1      |
| hsa-mir-129-5p | YY1       |
| hsa-mir-129-5p | ZNF708    |
| hsa-mir-129-5p | ZNF154    |
| hsa-mir-129-5p | ZNF215    |
| hsa-mir-129-5p | ZNF226    |
| hsa-mir-129-5p | LAPTM5    |
| hsa-mir-129-5p | SLBP      |
| hsa-mir-129-5p | BRD3      |
| hsa-mir-129-5p | SLC25A16  |
| hsa-mir-129-5p | ADAM12    |
| hsa-mir-129-5p | RND2      |
| hsa-mir-129-5p | EOMES     |
| hsa-mir-129-5p | HIST1H4C  |
| hsa-mir-129-5p | TTF2      |
| hsa-mir-129-5p | SORBS2    |
| hsa-mir-129-5p | CBX4      |
| hsa-mir-129-5p | AKR7A2    |
| hsa-mir-129-5p | TP63      |
| hsa-mir-129-5p | NCOA1     |
| hsa-mir-129-5p | BECN1     |
| hsa-mir-129-5p | NOL4      |
| hsa-mir-129-5p | HIST1H2BJ |
| hsa-mir-129-5p | PIAS2     |
| hsa-mir-129-5p | MAP3K13   |
| hsa-mir-129-5p | VAPA      |
| hsa-mir-129-5p | TIAF1     |
| hsa-mir-129-5p | LRAT      |
| hsa-mir-129-5p | TBRG4     |
| hsa-mir-129-5p | RPS6KA5   |
| hsa-mir-129-5p | PIWIL1    |
| hsa-mir-129-5p | SNAP29    |
| hsa-mir-129-5p | RAB9A     |
| hsa-mir-129-5p | KIF3B     |
| hsa-mir-129-5p | CIAO1     |
| hsa-mir-129-5p | GRAP2     |
| hsa-mir-129-5p | ZRANB2    |
| hsa-mir-129-5p | CRIP1     |
| hsa-mir-129-5p | KCNK6     |
| hsa-mir-129-5p | HOMER1    |



|                |          |
|----------------|----------|
| hsa-mir-129-5p | RASAL2   |
| hsa-mir-129-5p | AKAP5    |
| hsa-mir-129-5p | ADAMTS4  |
| hsa-mir-129-5p | SPTLC2   |
| hsa-mir-129-5p | EI24     |
| hsa-mir-129-5p | H6PD     |
| hsa-mir-129-5p | GABBR2   |
| hsa-mir-129-5p | CLOCK    |
| hsa-mir-129-5p | RNF14    |
| hsa-mir-129-5p | ABCG1    |
| hsa-mir-129-5p | USP6NL   |
| hsa-mir-129-5p | SEMA3E   |
| hsa-mir-129-5p | KIAA0408 |
| hsa-mir-129-5p | CCP110   |
| hsa-mir-129-5p | JAKMIP2  |
| hsa-mir-129-5p | SEC24D   |
| hsa-mir-129-5p | ZC3H11A  |
| hsa-mir-129-5p | PAN2     |
| hsa-mir-129-5p | ZBTB5    |
| hsa-mir-129-5p | CCS      |
| hsa-mir-129-5p | SH2B3    |
| hsa-mir-129-5p | HMGXB4   |
| hsa-mir-129-5p | ABCC5    |
| hsa-mir-129-5p | ACTR1A   |
| hsa-mir-129-5p | TRIM13   |
| hsa-mir-129-5p | CALCOCO2 |
| hsa-mir-129-5p | SF3A1    |
| hsa-mir-129-5p | MCRS1    |
| hsa-mir-129-5p | FST      |
| hsa-mir-129-5p | TRIM38   |
| hsa-mir-129-5p | ANP32B   |
| hsa-mir-129-5p | RABAC1   |
| hsa-mir-129-5p | COLEC10  |
| hsa-mir-129-5p | CDC42EP3 |
| hsa-mir-129-5p | IGF2BP3  |
| hsa-mir-129-5p | IGF2BP2  |
| hsa-mir-129-5p | CD226    |
| hsa-mir-129-5p | DCTN6    |
| hsa-mir-129-5p | TNFSF13B |
| hsa-mir-129-5p | GMEB1    |
| hsa-mir-129-5p | UGT2B11  |
| hsa-mir-129-5p | POLQ     |
| hsa-mir-129-5p | MAP3K2   |
| hsa-mir-129-5p | ABL2     |

|                |        |
|----------------|--------|
| hsa-mir-129-5p | ADD3   |
| hsa-mir-129-5p | AK1    |
| hsa-mir-129-5p | APC    |
| hsa-mir-129-5p | XIAP   |
| hsa-mir-129-5p | ARSD   |
| hsa-mir-129-5p | ARSE   |
| hsa-mir-129-5p | ZFHX3  |
| hsa-mir-129-5p | ATRX   |
| hsa-mir-129-5p | AZF1   |
| hsa-mir-129-5p | BCL7A  |
| hsa-mir-129-5p | BDKRB2 |
| hsa-mir-129-5p | BID    |
| hsa-mir-129-5p | PRDM1  |
| hsa-mir-129-5p | BMPR2  |
| hsa-mir-129-5p | C1S    |
| hsa-mir-129-5p | CACNG1 |
| hsa-mir-129-5p | CALM1  |
| hsa-mir-129-5p | CBS    |
| hsa-mir-129-5p | CDH1   |
| hsa-mir-129-5p | CDK6   |
| hsa-mir-129-5p | CHRM2  |
| hsa-mir-129-5p | AP1S1  |
| hsa-mir-129-5p | CCR4   |
| hsa-mir-129-5p | CCR6   |
| hsa-mir-129-5p | COL1A1 |
| hsa-mir-129-5p | COL9A2 |
| hsa-mir-129-5p | KLF6   |
| hsa-mir-129-5p | COX6B1 |
| hsa-mir-129-5p | CPE    |
| hsa-mir-129-5p | CPT1A  |
| hsa-mir-129-5p | HAPLN1 |
| hsa-mir-129-5p | MAPK14 |
| hsa-mir-129-5p | VCAN   |
| hsa-mir-129-5p | CTNS   |
| hsa-mir-129-5p | DAB2   |
| hsa-mir-129-5p | DARS   |
| hsa-mir-129-5p | DDX3X  |
| hsa-mir-129-5p | DMXL1  |
| hsa-mir-129-5p | TIMM8A |
| hsa-mir-129-5p | DNAH9  |
| hsa-mir-129-5p | ARID3A |
| hsa-mir-129-5p | DSG3   |
| hsa-mir-129-5p | DUSP1  |
| hsa-mir-129-5p | EBF1   |

|                |         |
|----------------|---------|
| hsa-mir-129-5p | EFNB1   |
| hsa-mir-129-5p | EIF1AX  |
| hsa-mir-129-5p | EMP2    |
| hsa-mir-129-5p | EP300   |
| hsa-mir-129-5p | EPB41L1 |
| hsa-mir-129-5p | EPB42   |
| hsa-mir-129-5p | EPS8    |
| hsa-mir-129-5p | ESD     |
| hsa-mir-129-5p | ESR1    |
| hsa-mir-129-5p | ETV6    |
| hsa-mir-129-5p | ACSL4   |
| hsa-mir-129-5p | FMR1    |
| hsa-mir-129-5p | FRK     |
| hsa-mir-129-5p | KDSR    |
| hsa-mir-129-5p | GABRB1  |
| hsa-mir-129-5p | GALNT1  |
| hsa-mir-129-5p | GDNF    |
| hsa-mir-129-5p | GFPT1   |
| hsa-mir-129-5p | GLUL    |
| hsa-mir-129-5p | GM2A    |
| hsa-mir-129-5p | GNAL    |
| hsa-mir-129-5p | GNAQ    |
| hsa-mir-129-5p | GRM3    |
| hsa-mir-129-5p | GTF2H1  |
| hsa-mir-129-5p | HMGB1   |
| hsa-mir-129-5p | HNF4G   |
| hsa-mir-129-5p | HNRNPA1 |
| hsa-mir-129-5p | HOXD11  |
| hsa-mir-129-5p | SP110   |
| hsa-mir-129-5p | IGF1    |
| hsa-mir-129-5p | IL10RB  |
| hsa-mir-129-5p | IL12RB2 |
| hsa-mir-129-5p | IMPA2   |
| hsa-mir-129-5p | IREB2   |
| hsa-mir-129-5p | CD82    |
| hsa-mir-129-5p | KCNJ3   |
| hsa-mir-129-5p | KCNJ6   |
| hsa-mir-129-5p | L1CAM   |
| hsa-mir-129-5p | LIMS1   |
| hsa-mir-129-5p | FADS1   |
| hsa-mir-129-5p | LPP     |
| hsa-mir-129-5p | CAPRIN1 |
| hsa-mir-129-5p | MBD1    |
| hsa-mir-129-5p | MBL2    |

|                |         |
|----------------|---------|
| hsa-mir-129-5p | MCM4    |
| hsa-mir-129-5p | MLLT6   |
| hsa-mir-129-5p | MYO10   |
| hsa-mir-129-5p | NDUFV3  |
| hsa-mir-129-5p | NEUROD2 |
| hsa-mir-129-5p | NFATC2  |
| hsa-mir-129-5p | NFIB    |
| hsa-mir-129-5p | NFRKB   |
| hsa-mir-129-5p | NOTCH1  |
| hsa-mir-129-5p | NPTX1   |
| hsa-mir-129-5p | NR4A2   |
| hsa-mir-129-5p | OMD     |
| hsa-mir-129-5p | PAX7    |
| hsa-mir-129-5p | PCK1    |
| hsa-mir-129-5p | PCM1    |
| hsa-mir-129-5p | PDE3A   |
| hsa-mir-129-5p | PDGFRA  |
| hsa-mir-129-5p | PDPK1   |
| hsa-mir-129-5p | ABCB1   |
| hsa-mir-129-5p | PIK3C3  |
| hsa-mir-129-5p | PITX1   |
| hsa-mir-129-5p | PLSCR1  |
| hsa-mir-129-5p | POLR2D  |
| hsa-mir-129-5p | POU2F2  |
| hsa-mir-129-5p | POU3F1  |
| hsa-mir-129-5p | PPARA   |
| hsa-mir-129-5p | PRKCD   |
| hsa-mir-129-5p | MAPK1   |
| hsa-mir-129-5p | MAP2K2  |
| hsa-mir-129-5p | PRKX    |
| hsa-mir-129-5p | PSMB9   |
| hsa-mir-129-5p | PTMA    |
| hsa-mir-129-5p | PTPN2   |
| hsa-mir-129-5p | PTPN14  |
| hsa-mir-129-5p | PVR     |
| hsa-mir-129-5p | RAB13   |
| hsa-mir-129-5p | RAB27A  |
| hsa-mir-129-5p | RANGAP1 |
| hsa-mir-129-5p | RBBP4   |
| hsa-mir-129-5p | RET     |
| hsa-mir-129-5p | RGS16   |
| hsa-mir-129-5p | RORA    |
| hsa-mir-129-5p | RPS23   |
| hsa-mir-129-5p | SATB1   |

|                |           |       |
|----------------|-----------|-------|
| hsa-mir-129-5p | SCN2B     |       |
| hsa-mir-129-5p | LMBRD2    |       |
| hsa-mir-129-5p | TIMM50    |       |
| hsa-mir-129-5p | FOXP2     |       |
| hsa-mir-129-5p | SYAP1     |       |
| hsa-mir-129-5p | TP53INP1  |       |
| hsa-mir-129-5p | CEP41     |       |
| hsa-mir-129-5p | GLCCI1    |       |
| hsa-mir-129-5p | LACTB     |       |
| hsa-mir-129-5p | GALNT13   |       |
| hsa-mir-129-5p | OSBPL10   |       |
| hsa-mir-129-5p |           | 3-Mar |
| hsa-mir-129-5p | ZNF554    |       |
| hsa-mir-129-5p | WDR92     |       |
| hsa-mir-129-5p | FAM210B   |       |
| hsa-mir-129-5p | GINM1     |       |
| hsa-mir-129-5p | EXOC3-AS1 |       |
| hsa-mir-129-5p | SNAP47    |       |
| hsa-mir-129-5p | LEAP2     |       |
| hsa-mir-129-5p | DEFB118   |       |
| hsa-mir-129-5p | EXOSC6    |       |
| hsa-mir-129-5p | FGD4      |       |
| hsa-mir-129-5p | ANKRD9    |       |
| hsa-mir-129-5p | ISCA2     |       |
| hsa-mir-129-5p | FSD2      |       |
| hsa-mir-129-5p | SGK494    |       |
| hsa-mir-129-5p | ZNF440    |       |
| hsa-mir-129-5p | SWSAP1    |       |
| hsa-mir-129-5p | ZNF573    |       |
| hsa-mir-129-5p | TRABD2A   |       |
| hsa-mir-129-5p | TYW5      |       |
| hsa-mir-129-5p | GALM      |       |
| hsa-mir-129-5p | OCIAD2    |       |
| hsa-mir-129-5p | FAM241A   |       |
| hsa-mir-129-5p | RAET1E    |       |
| hsa-mir-129-5p | MPLKIP    |       |
| hsa-mir-129-5p | UNC5D     |       |
| hsa-mir-129-5p | SLITRK4   |       |
| hsa-mir-129-5p | OTUD6A    |       |
| hsa-mir-129-5p | SPIN4     |       |
| hsa-mir-129-5p | ASB8      |       |
| hsa-mir-129-5p | BRI3BP    |       |
| hsa-mir-129-5p | UBE2F     |       |
| hsa-mir-129-5p | WFDC6     |       |

|                |           |
|----------------|-----------|
| hsa-mir-129-5p | SESN3     |
| hsa-mir-129-5p | TMEM120B  |
| hsa-mir-129-5p | HNRNPA1L2 |
| hsa-mir-129-5p | CMTM4     |
| hsa-mir-129-5p | WIPF2     |
| hsa-mir-129-5p | CLDN19    |
| hsa-mir-129-5p | BTBD19    |
| hsa-mir-129-5p | TTL       |
| hsa-mir-129-5p | CKAP2L    |
| hsa-mir-129-5p | C2orf15   |
| hsa-mir-129-5p | GPR155    |
| hsa-mir-129-5p | DTX3L     |
| hsa-mir-129-5p | PPM1K     |
| hsa-mir-129-5p | SLC38A9   |
| hsa-mir-129-5p | SRFBP1    |
| hsa-mir-129-5p | PRELID2   |
| hsa-mir-129-5p | RUNDC3B   |
| hsa-mir-129-5p | METTTL27  |
| hsa-mir-129-5p | TTC39B    |
| hsa-mir-129-5p | ZDHHC15   |
| hsa-mir-129-5p | ZNF519    |
| hsa-mir-129-5p | KANK4     |
| hsa-mir-129-5p | PARP15    |
| hsa-mir-129-5p | FUT11     |
| hsa-mir-129-5p | ADAMTS18  |
| hsa-mir-129-5p | ZNF384    |
| hsa-mir-129-5p | AGO3      |
| hsa-mir-129-5p | AGO4      |
| hsa-mir-129-5p | VSTM4     |
| hsa-mir-129-5p | IBA57     |
| hsa-mir-129-5p | PDE12     |
| hsa-mir-129-5p | LRRC55    |
| hsa-mir-129-5p | ZNF25     |
| hsa-mir-129-5p | FAM124A   |
| hsa-mir-129-5p | HNRNPA3   |
| hsa-mir-129-5p | C10orf111 |
| hsa-mir-129-5p | C6orf223  |
| hsa-mir-129-5p | OARD1     |
| hsa-mir-129-5p | ZNRF2     |
| hsa-mir-129-5p | MCOLN2    |
| hsa-mir-129-5p | TMEM151A  |
| hsa-mir-129-5p | ANKS4B    |
| hsa-mir-129-5p | MAGI3     |
| hsa-mir-129-5p | AUTS8     |

|                |           |
|----------------|-----------|
| hsa-mir-129-5p | KCNRG     |
| hsa-mir-129-5p | ZFP82     |
| hsa-mir-129-5p | NWD1      |
| hsa-mir-129-5p | SEC14L4   |
| hsa-mir-129-5p | RNF149    |
| hsa-mir-129-5p | PRRT3     |
| hsa-mir-129-5p | CEP57L1   |
| hsa-mir-129-5p | SCAI      |
| hsa-mir-129-5p | POTED     |
| hsa-mir-129-5p | MMAB      |
| hsa-mir-129-5p | CYP27C1   |
| hsa-mir-129-5p | ZDHHC21   |
| hsa-mir-129-5p |           |
| hsa-mir-129-5p | FAM71F2   |
| hsa-mir-129-5p | ZNF429    |
| hsa-mir-129-5p | ZNF699    |
| hsa-mir-129-5p | TMEM233   |
| hsa-mir-129-5p | LINC01551 |
| hsa-mir-129-5p | PLEKHM3   |
| hsa-mir-129-5p | ONECUT3   |
| hsa-mir-129-5p | ZNF793    |
| hsa-mir-129-5p | C7orf65   |
| hsa-mir-129-5p | YY2       |
| hsa-mir-129-5p | SRCAP     |
| hsa-mir-129-5p | RAB10     |
| hsa-mir-129-5p | SF3A3     |
| hsa-mir-129-5p | PNRC1     |
| hsa-mir-129-5p | ACOT2     |
| hsa-mir-129-5p | CKAP4     |
| hsa-mir-129-5p | CCNI      |
| hsa-mir-129-5p | FGFR1OP   |
| hsa-mir-129-5p | PLA2G16   |
| hsa-mir-129-5p | NUDT3     |
| hsa-mir-129-5p | FAM107A   |
| hsa-mir-129-5p | ZNF277    |
| hsa-mir-129-5p | SLC2A6    |
| hsa-mir-129-5p | AKAP10    |
| hsa-mir-129-5p | DUSP10    |
| hsa-mir-129-5p | PXMP4     |
| hsa-mir-129-5p | IKZF3     |
| hsa-mir-129-5p | NTNG1     |
| hsa-mir-129-5p | FNDC3A    |
| hsa-mir-129-5p | MLXIP     |
| hsa-mir-129-5p | MON1B     |

14-Sep

|                |          |
|----------------|----------|
| hsa-mir-129-5p | DIS3     |
| hsa-mir-129-5p | EPN2     |
| hsa-mir-129-5p | IGSF9B   |
| hsa-mir-129-5p | EXPH5    |
| hsa-mir-129-5p | TNRC6B   |
| hsa-mir-129-5p | RAD54L2  |
| hsa-mir-129-5p | NUP205   |
| hsa-mir-129-5p | TLL12    |
| hsa-mir-129-5p | METAP1   |
| hsa-mir-129-5p | LPIN1    |
| hsa-mir-129-5p | ARL6IP1  |
| hsa-mir-129-5p | CAMTA1   |
| hsa-mir-129-5p | ICOSLG   |
| hsa-mir-129-5p | KIAA0930 |
| hsa-mir-129-5p | TTC28    |
| hsa-mir-129-5p | DPY19L1  |
| hsa-mir-129-5p | RYBP     |
| hsa-mir-129-5p | SLC44A1  |
| hsa-mir-129-5p | CBX6     |
| hsa-mir-129-5p | POFUT1   |
| hsa-mir-129-5p | KAT6B    |
| hsa-mir-129-5p | ACAP2    |
| hsa-mir-129-5p | ADAT1    |
| hsa-mir-129-5p | NUP62    |
| hsa-mir-129-5p | TMEM245  |
| hsa-mir-129-5p | HYPK     |
| hsa-mir-129-5p | MTO1     |
| hsa-mir-129-5p | FBXL2    |
| hsa-mir-129-5p | TECPR1   |
| hsa-mir-129-5p | LETMD1   |
| hsa-mir-129-5p | RTTN     |
| hsa-mir-129-5p | NGDN     |
| hsa-mir-129-5p | TKFC     |
| hsa-mir-129-5p | NSMF     |
| hsa-mir-129-5p | ZNF500   |
| hsa-mir-129-5p | TIAM2    |
| hsa-mir-129-5p | TIMM8B   |
| hsa-mir-129-5p | OSTF1    |
| hsa-mir-129-5p | ZNF285   |
| hsa-mir-129-5p | RNF11    |
| hsa-mir-129-5p | FAM184B  |
| hsa-mir-129-5p | SIGLEC9  |
| hsa-mir-129-5p | RPS6KA6  |
| hsa-mir-129-5p | P2RY10   |



|                |          |
|----------------|----------|
| hsa-mir-129-5p | RRP7A    |
| hsa-mir-129-5p | POLL     |
| hsa-mir-129-5p | APOBEC3C |
| hsa-mir-129-5p | OSTM1    |
| hsa-mir-129-5p | SPCS1    |
| hsa-mir-129-5p | DNAJC15  |
| hsa-mir-129-5p | CFAP20   |
| hsa-mir-129-5p | PRICKLE4 |
| hsa-mir-129-5p | STRN3    |
| hsa-mir-129-5p | KCNIP3   |
| hsa-mir-129-5p | ST8SIA3  |
| hsa-mir-129-5p | YARS2    |
| hsa-mir-129-5p | MEMO1    |
| hsa-mir-129-5p | MRPL4    |
| hsa-mir-129-5p | KLHL5    |
| hsa-mir-129-5p | ABHD5    |
| hsa-mir-129-5p | RDH11    |
| hsa-mir-129-5p | HSD17B12 |
| hsa-mir-129-5p | PLEKHO1  |
| hsa-mir-129-5p | GLTP     |
| hsa-mir-129-5p | CRIM1    |
| hsa-mir-129-5p | PHF21A   |
| hsa-mir-129-5p | TAOK3    |
| hsa-mir-129-5p | UFM1     |
| hsa-mir-129-5p | MRPS23   |
| hsa-mir-129-5p | CHMP3    |
| hsa-mir-129-5p | LSM8     |
| hsa-mir-129-5p | EMCN     |
| hsa-mir-129-5p | ATP8A2   |
| hsa-mir-129-5p | WNT4     |
| hsa-mir-129-5p | RBM47    |
| hsa-mir-129-5p | GNL3L    |
| hsa-mir-129-5p | RSBN1    |
| hsa-mir-129-5p | DYM      |
| hsa-mir-129-5p | TRPM7    |
| hsa-mir-129-5p | GIN1     |
| hsa-mir-129-5p | BIVM     |
| hsa-mir-129-5p | PGPEP1   |
| hsa-mir-129-5p | CNTLN    |
| hsa-mir-129-5p | MTMR10   |
| hsa-mir-129-5p | LAX1     |
| hsa-mir-129-5p | TTC19    |
| hsa-mir-129-5p | TRMT10C  |
| hsa-mir-129-5p | RNF125   |

|                |          |
|----------------|----------|
| hsa-mir-129-5p | PIGX     |
| hsa-mir-129-5p | SLC35F6  |
| hsa-mir-129-5p | TTC38    |
| hsa-mir-129-5p | PHIP     |
| hsa-mir-129-5p | PTCD3    |
| hsa-mir-129-5p | TMEM51   |
| hsa-mir-129-5p | FIGN     |
| hsa-mir-129-5p | THAP1    |
| hsa-mir-129-5p | LINS1    |
| hsa-mir-129-5p | RIF1     |
| hsa-mir-129-5p | SBNO1    |
| hsa-mir-129-5p | UBA6     |
| hsa-mir-129-5p | ELP2     |
| hsa-mir-129-5p | CHDH     |
| hsa-mir-129-5p | DHTKD1   |
| hsa-mir-129-5p | FEM1A    |
| hsa-mir-129-5p | SVOP     |
| hsa-mir-129-5p | SLC30A10 |
| hsa-mir-129-5p | SOX6     |
| hsa-mir-129-5p | CDV3     |
| hsa-mir-129-5p | LRRC40   |
| hsa-mir-129-5p | DENND4C  |
| hsa-mir-129-5p | LUC7L    |
| hsa-mir-129-5p | TMEM30A  |
| hsa-mir-129-5p | FGD6     |
| hsa-mir-129-5p | DCP1A    |
| hsa-mir-129-5p | CENPN    |
| hsa-mir-129-5p | CISD1    |
| hsa-mir-129-5p | C21orf62 |
| hsa-mir-129-5p | CTNBL1   |
| hsa-mir-129-5p | PARD3    |
| hsa-mir-129-5p | SAR1A    |
| hsa-mir-129-5p | LHX9     |
| hsa-mir-129-5p | YAE1D1   |
| hsa-mir-129-5p | LYRM4    |
| hsa-mir-129-5p | MAN1C1   |
| hsa-mir-129-5p | PAK5     |
| hsa-mir-129-5p | NIPAL3   |
| hsa-mir-129-5p | ERGIC1   |
| hsa-mir-129-5p | SMAGP    |
| hsa-mir-129-5p | GJD2     |
| hsa-mir-129-5p | LRTM1    |
| hsa-mir-129-5p | AS3MT    |
| hsa-mir-129-5p | ISY1     |

|                |          |
|----------------|----------|
| hsa-mir-129-5p | HEG1     |
| hsa-mir-129-5p | MTA3     |
| hsa-mir-129-5p | PCDH19   |
| hsa-mir-129-5p | KCTD16   |
| hsa-mir-129-5p | TAOK1    |
| hsa-mir-129-5p | SEMA6A   |
| hsa-mir-129-5p | CEP126   |
| hsa-mir-129-5p | FNIP2    |
| hsa-mir-129-5p | SLAIN2   |
| hsa-mir-129-5p | POGK     |
| hsa-mir-129-5p | USP28    |
| hsa-mir-129-5p | KIAA1549 |
| hsa-mir-129-5p | ZFP14    |
| hsa-mir-129-5p | GATAD1   |
| hsa-mir-129-5p | ZNF410   |
| hsa-mir-129-5p | ZNF462   |
| hsa-mir-129-5p | PBOV1    |
| hsa-mir-129-5p | ANKEF1   |
| hsa-mir-129-5p | RBM26    |
| hsa-mir-129-5p | RRAGC    |
| hsa-mir-129-5p | PAPD5    |
| hsa-mir-129-5p | GMCL1    |
| hsa-mir-129-5p | NOM1     |
| hsa-mir-129-5p | UNKL     |
| hsa-mir-129-5p | REEP1    |
| hsa-mir-129-5p | COA7     |
| hsa-mir-129-5p | SLC2A11  |
| hsa-mir-129-5p | METRN    |
| hsa-mir-129-5p | ZNF655   |
| hsa-mir-129-5p | TSEN34   |
| hsa-mir-129-5p | C1orf50  |
| hsa-mir-129-5p | SMIM7    |
| hsa-mir-129-5p | TTPAL    |
| hsa-mir-129-5p | DCAF10   |
| hsa-mir-129-5p | GLB1L    |
| hsa-mir-129-5p | LRRC2    |
| hsa-mir-129-5p | NKAIN1   |
| hsa-mir-129-5p | CERS4    |
| hsa-mir-129-5p | ZYG11B   |
| hsa-mir-129-5p | AAGAB    |
| hsa-mir-129-5p | ZNF419   |
| hsa-mir-129-5p | GSTCD    |
| hsa-mir-129-5p | PTCD2    |
| hsa-mir-129-5p | METTTL8  |

|                |           |
|----------------|-----------|
| hsa-mir-129-5p | TNIP3     |
| hsa-mir-129-5p | KIAA0319L |
| hsa-mir-129-5p | SLC35E1   |
| hsa-mir-129-5p | TRMT2B    |
| hsa-mir-129-5p | FBXL18    |
| hsa-mir-129-5p | C3orf36   |
| hsa-mir-129-5p | BICC1     |
| hsa-mir-129-5p | ZNF703    |
| hsa-mir-129-5p | ORAI2     |
| hsa-mir-129-5p | KLHL15    |
| hsa-mir-129-5p | EPC1      |
| hsa-mir-129-5p | WDR82     |
| hsa-mir-129-5p | PNPLA3    |
| hsa-mir-129-5p | APOL6     |
| hsa-mir-129-5p | LMAN2L    |
| hsa-mir-129-5p | PLA2G12A  |
| hsa-mir-129-5p | FAM83D    |
| hsa-mir-129-5p | TSPAN14   |
| hsa-mir-129-5p | SPRY4     |
| hsa-mir-129-5p | NRIP2     |
| hsa-mir-129-5p | LONP2     |
| hsa-mir-129-5p | MIXL1     |
| hsa-mir-129-5p | KCTD10    |
| hsa-mir-129-5p | KREMEN1   |
| hsa-mir-129-5p | MAGT1     |
| hsa-mir-129-5p | CHCHD5    |
| hsa-mir-129-5p | YIPF4     |
| hsa-mir-129-5p | SLC25A33  |
| hsa-mir-129-5p | CCDC77    |
| hsa-mir-129-5p | LZIC      |
| hsa-mir-129-5p | NIFK      |
| hsa-mir-129-5p | HOOK3     |
| hsa-mir-129-5p | BRSK1     |
| hsa-mir-129-5p | ZBTB37    |
| hsa-mir-129-5p | NTNG2     |
| hsa-mir-129-5p | PRRC2B    |
| hsa-mir-129-5p | CNDP1     |
| hsa-mir-129-5p | NFKBID    |
| hsa-mir-129-5p | NFATC2IP  |
| hsa-mir-129-5p | SLC35B4   |
| hsa-mir-129-5p | MICALCL   |
| hsa-mir-129-5p | LSM10     |
| hsa-mir-129-5p | TMEM241   |
| hsa-mir-129-5p | HIST1H2AH |

|                |              |
|----------------|--------------|
| hsa-mir-129-5p | PAQR8        |
| hsa-mir-129-5p | STON2        |
| hsa-mir-129-5p | SELENO1      |
| hsa-mir-129-5p | SCIN         |
| hsa-mir-129-5p | CHRFAM7A     |
| hsa-mir-129-5p | KBTBD6       |
| hsa-mir-129-5p | KNSTRN       |
| hsa-mir-129-5p | ANGEL2       |
| hsa-mir-129-5p | BOD1         |
| hsa-mir-129-5p | ZNF502       |
| hsa-mir-129-5p | ANKRD44      |
| hsa-mir-129-5p | ZNF845       |
| hsa-mir-129-5p | DSEL         |
| hsa-mir-129-5p | ISPD         |
| hsa-mir-129-5p | SHISA9       |
| hsa-mir-129-5p | C16orf52     |
| hsa-mir-129-5p | C17orf99     |
| hsa-mir-129-5p | ERVMER34-1   |
| hsa-mir-129-5p | RNF103-CHMP3 |
| hsa-mir-129-5p | RBMXL1       |
| hsa-mir-129-5p | RNF165       |
| hsa-mir-129-5p | ARGFX        |
| hsa-mir-129-5p | C6orf132     |
| hsa-mir-129-5p | TEX22        |
| hsa-mir-129-5p | ZBTB8A       |
| hsa-mir-129-5p | NCF1         |
| hsa-mir-129-5p | CCDC169      |
| hsa-mir-129-5p | SLC35E2B     |
| hsa-mir-129-5p | GTF2H5       |
| hsa-mir-129-5p | TRIM72       |
| hsa-mir-212-3p | EIF2S3       |
| hsa-mir-212-3p | ACSL4        |
| hsa-mir-212-3p | ACHE         |
| hsa-mir-212-3p | ADCY1        |
| hsa-mir-212-3p | AMD1         |
| hsa-mir-212-3p | APBA1        |
| hsa-mir-212-3p | ART4         |
| hsa-mir-212-3p | BRCA1        |
| hsa-mir-212-3p | CCNA2        |
| hsa-mir-212-3p | CCNB1        |
| hsa-mir-212-3p | CDKN1A       |
| hsa-mir-212-3p | PLAGL2       |
| hsa-mir-212-3p | PSMA2        |
| hsa-mir-212-3p | GNB1         |

|                |          |
|----------------|----------|
| hsa-mir-212-3p | HOXC4    |
| hsa-mir-212-3p | HSPA1B   |
| hsa-mir-212-3p | KCNJ2    |
| hsa-mir-212-3p | KPNA1    |
| hsa-mir-212-3p | LDLR     |
| hsa-mir-212-3p | LIFR     |
| hsa-mir-212-3p | SMAD2    |
| hsa-mir-212-3p | MECP2    |
| hsa-mir-212-3p | MYC      |
| hsa-mir-212-3p | PFAS     |
| hsa-mir-212-3p | WT1      |
| hsa-mir-212-3p | ZNF711   |
| hsa-mir-212-3p | FXR1     |
| hsa-mir-212-3p | DPF1     |
| hsa-mir-212-3p | KDM5C    |
| hsa-mir-212-3p | FZD6     |
| hsa-mir-212-3p | PEA15    |
| hsa-mir-212-3p | SAP30    |
| hsa-mir-212-3p | USP8     |
| hsa-mir-212-3p | ABCG2    |
| hsa-mir-212-3p | DAZAP2   |
| hsa-mir-212-3p | HS3ST3B1 |
| hsa-mir-212-3p | STAG1    |
| hsa-mir-212-3p | CD226    |
| hsa-mir-212-3p | NUP50    |
| hsa-mir-212-3p | RAB18    |
| hsa-mir-212-3p | RRS1     |
| hsa-mir-212-3p | OTUD3    |
| hsa-mir-212-3p | CRTC1    |
| hsa-mir-212-3p | TSPAN12  |
| hsa-mir-212-3p | SGK3     |
| hsa-mir-212-3p | MTO1     |
| hsa-mir-212-3p | ASF1A    |
| hsa-mir-212-3p | AGO1     |
| hsa-mir-212-3p | EML4     |
| hsa-mir-212-3p | GMNN     |
| hsa-mir-212-3p | PHF20L1  |
| hsa-mir-212-3p | IER3IP1  |
| hsa-mir-212-3p | IRAK4    |
| hsa-mir-212-3p | PTCH1    |
| hsa-mir-212-3p | PXN      |
| hsa-mir-212-3p | RAB5B    |
| hsa-mir-212-3p | RB1      |
| hsa-mir-212-3p | RBP2     |

|                |          |
|----------------|----------|
| hsa-mir-212-3p | RFXAP    |
| hsa-mir-212-3p | SOD2     |
| hsa-mir-212-3p | SOX4     |
| hsa-mir-212-3p | SOX11    |
| hsa-mir-212-3p | ELOC     |
| hsa-mir-212-3p | TJP1     |
| hsa-mir-212-3p | CHAC1    |
| hsa-mir-212-3p | SH3TC2   |
| hsa-mir-212-3p | DCAF17   |
| hsa-mir-212-3p | SLC25A32 |
| hsa-mir-212-3p | VMP1     |
| hsa-mir-212-3p | CALN1    |
| hsa-mir-212-3p | SLC10A7  |
| hsa-mir-212-3p | HOOK3    |
| hsa-mir-212-3p | TJAP1    |
| hsa-mir-212-3p | ZNF280B  |
| hsa-mir-212-3p | TRUB1    |
| hsa-mir-212-3p | UBXN2A   |
| hsa-mir-212-3p | BMPER    |
| hsa-mir-212-3p | OLFML2A  |
| hsa-mir-212-3p | ARID2    |
| hsa-mir-212-3p | TWISTNB  |
| hsa-mir-212-3p | ZNF724   |
| hsa-mir-212-3p | CCDC169  |
| hsa-mir-212-3p | OCLN     |
| hsa-mir-212-3p | SETD5    |
| hsa-mir-212-3p | PARP11   |
| hsa-mir-212-3p | CYP20A1  |
| hsa-mir-212-3p | TNRC6C   |
| hsa-mir-212-3p | PRDM15   |
| hsa-mir-212-3p | C6orf106 |
| hsa-mir-212-3p | PRAMEF1  |
| hsa-mir-212-3p | GID4     |
| hsa-mir-212-3p | ALKBH4   |
| hsa-mir-212-3p | BRWD1    |
| hsa-mir-212-3p | SLC38A2  |
| hsa-mir-132-3p | GJE1     |
| hsa-mir-132-3p | CCDC169  |
| hsa-mir-132-3p | EOGT     |
| hsa-mir-132-3p | KRT6C    |
| hsa-mir-132-3p | COX8C    |
| hsa-mir-132-3p | KCTD4    |
| hsa-mir-132-3p | FAM221B  |
| hsa-mir-132-3p | ZNF724   |

|                |           |
|----------------|-----------|
| hsa-mir-132-3p | SYNDIG1L  |
| hsa-mir-132-3p | KRTAP4-11 |
| hsa-mir-132-3p | NCS1      |
| hsa-mir-132-3p | TSPAN12   |
| hsa-mir-132-3p | MTO1      |
| hsa-mir-132-3p | ASF1A     |
| hsa-mir-132-3p | FGF22     |
| hsa-mir-132-3p | B3GAT1    |
| hsa-mir-132-3p | AGO2      |
| hsa-mir-132-3p | EML4      |
| hsa-mir-132-3p | SEC61A1   |
| hsa-mir-132-3p | DMGDH     |
| hsa-mir-132-3p | MDFIC     |
| hsa-mir-132-3p | GMNN      |
| hsa-mir-132-3p | PHF20L1   |
| hsa-mir-132-3p | IER3IP1   |
| hsa-mir-132-3p | IRAK4     |
| hsa-mir-132-3p | JPT1      |
| hsa-mir-132-3p | ZDHHC2    |
| hsa-mir-132-3p | SNX7      |
| hsa-mir-132-3p | POLK      |
| hsa-mir-132-3p | HACD3     |
| hsa-mir-132-3p | CTDSPL2   |
| hsa-mir-132-3p | BRWD1     |
| hsa-mir-132-3p | SLC38A2   |
| hsa-mir-132-3p | CCSER2    |
| hsa-mir-132-3p | GNL3L     |
| hsa-mir-132-3p | ALKBH4    |
| hsa-mir-132-3p | MTMR10    |
| hsa-mir-132-3p | KLHL11    |
| hsa-mir-132-3p | VPS13D    |
| hsa-mir-132-3p | SETD5     |
| hsa-mir-132-3p | ETNK2     |
| hsa-mir-132-3p | YY1AP1    |
| hsa-mir-132-3p | UBE2W     |
| hsa-mir-132-3p | LGR4      |
| hsa-mir-132-3p | TRIM36    |
| hsa-mir-132-3p | SOX6      |
| hsa-mir-132-3p | DOCK10    |
| hsa-mir-132-3p | INTS8     |
| hsa-mir-132-3p | MUC13     |
| hsa-mir-132-3p | PARP11    |
| hsa-mir-132-3p | RTN4      |
| hsa-mir-132-3p | CYP20A1   |



|                |          |
|----------------|----------|
| hsa-mir-132-3p | TNRC6C   |
| hsa-mir-132-3p | PRX      |
| hsa-mir-132-3p | AASDHPPT |
| hsa-mir-132-3p | FKBP10   |
| hsa-mir-132-3p | PRDM15   |
| hsa-mir-132-3p | PRSS22   |
| hsa-mir-132-3p | SAMSN1   |
| hsa-mir-132-3p | C6orf106 |
| hsa-mir-132-3p | PRAMEF1  |
| hsa-mir-132-3p | C8orf33  |
| hsa-mir-132-3p | GID4     |
| hsa-mir-132-3p | CHAC1    |
| hsa-mir-132-3p | RNF128   |
| hsa-mir-132-3p | SH3TC2   |
| hsa-mir-132-3p | FAT4     |
| hsa-mir-132-3p | GSTCD    |
| hsa-mir-132-3p | DCAF17   |
| hsa-mir-132-3p | SLC25A32 |
| hsa-mir-132-3p | VMP1     |
| hsa-mir-132-3p | TMEM47   |
| hsa-mir-132-3p | TLN2     |
| hsa-mir-132-3p | CALN1    |
| hsa-mir-132-3p | SLC10A7  |
| hsa-mir-132-3p | HOOK3    |
| hsa-mir-132-3p | FBN3     |
| hsa-mir-132-3p | EBPL     |
| hsa-mir-132-3p | PARP10   |
| hsa-mir-132-3p | WNT3A    |
| hsa-mir-132-3p | EMILIN3  |
| hsa-mir-132-3p | DEPDC7   |
| hsa-mir-132-3p | ADAMTSL1 |
| hsa-mir-132-3p | TJAP1    |
| hsa-mir-132-3p | OSBPL8   |
| hsa-mir-132-3p | SFXN2    |
| hsa-mir-132-3p | FAT3     |
| hsa-mir-132-3p | ARL14EP  |
| hsa-mir-132-3p | CMTM3    |
| hsa-mir-132-3p | CST9L    |
| hsa-mir-132-3p | FAM199X  |
| hsa-mir-132-3p | MUC17    |
| hsa-mir-132-3p | ZNF280B  |
| hsa-mir-132-3p | TRUB1    |
| hsa-mir-132-3p | KBTBD3   |
| hsa-mir-132-3p | FAM81A   |

|                |          |
|----------------|----------|
| hsa-mir-132-3p | ANKRD29  |
| hsa-mir-132-3p | ARL6IP6  |
| hsa-mir-132-3p | SYNE3    |
| hsa-mir-132-3p | SPRED1   |
| hsa-mir-132-3p | UBXN2A   |
| hsa-mir-132-3p | LCA5     |
| hsa-mir-132-3p | BMPER    |
| hsa-mir-132-3p | OLFML2A  |
| hsa-mir-132-3p | ARID2    |
| hsa-mir-132-3p | CC2D1B   |
| hsa-mir-132-3p | ARL13B   |
| hsa-mir-132-3p | ADGRF4   |
| hsa-mir-132-3p | TWISTNB  |
| hsa-mir-132-3p | SYT14    |
| hsa-mir-132-3p | ADH1A    |
| hsa-mir-132-3p | ALK      |
| hsa-mir-132-3p | AMD1     |
| hsa-mir-132-3p | ANXA2    |
| hsa-mir-132-3p | APBA1    |
| hsa-mir-132-3p | TRIM23   |
| hsa-mir-132-3p | ARF6     |
| hsa-mir-132-3p | ARR3     |
| hsa-mir-132-3p | ART4     |
| hsa-mir-132-3p | TNFRSF17 |
| hsa-mir-132-3p | BDNF     |
| hsa-mir-132-3p | BNIP2    |
| hsa-mir-132-3p | CA1      |
| hsa-mir-132-3p | CALU     |
| hsa-mir-132-3p | CASP7    |
| hsa-mir-132-3p | CCNA2    |
| hsa-mir-132-3p | CCNB1    |
| hsa-mir-132-3p | CDH3     |
| hsa-mir-132-3p | CDKN1A   |
| hsa-mir-132-3p | CFTR     |
| hsa-mir-132-3p | CHRNA5   |
| hsa-mir-132-3p | CR2      |
| hsa-mir-132-3p | CRK      |
| hsa-mir-132-3p | CSTF3    |
| hsa-mir-132-3p | CYP2E1   |
| hsa-mir-132-3p | CYP26A1  |
| hsa-mir-132-3p | CD55     |
| hsa-mir-132-3p | HBEGF    |
| hsa-mir-132-3p | ECT2     |
| hsa-mir-132-3p | EGFR     |

|                |          |
|----------------|----------|
| hsa-mir-132-3p | EIF2S3   |
| hsa-mir-132-3p | EPHA4    |
| hsa-mir-132-3p | EYA4     |
| hsa-mir-132-3p | FABP7    |
| hsa-mir-132-3p | ACSL4    |
| hsa-mir-132-3p | FGF2     |
| hsa-mir-132-3p | FOXO1    |
| hsa-mir-132-3p | FUT1     |
| hsa-mir-132-3p | GATA3    |
| hsa-mir-132-3p | NIPSNAP2 |
| hsa-mir-132-3p | GCNT1    |
| hsa-mir-132-3p | GK       |
| hsa-mir-132-3p | GNB1     |
| hsa-mir-132-3p | GTF2H1   |
| hsa-mir-132-3p | HOXC4    |
| hsa-mir-132-3p | HSPA1B   |
| hsa-mir-132-3p | IMPA1    |
| hsa-mir-132-3p | IRAK1    |
| hsa-mir-132-3p | KCNJ9    |
| hsa-mir-132-3p | KIR3DL1  |
| hsa-mir-132-3p | KIR3DL2  |
| hsa-mir-132-3p | KPNA1    |
| hsa-mir-132-3p | RPSA     |
| hsa-mir-132-3p | STMN1    |
| hsa-mir-132-3p | LDLR     |
| hsa-mir-132-3p | LFNG     |
| hsa-mir-132-3p | LIFR     |
| hsa-mir-132-3p | LIG4     |
| hsa-mir-132-3p | LOXL1    |
| hsa-mir-132-3p | SMAD2    |
| hsa-mir-132-3p | MAP1B    |
| hsa-mir-132-3p | MEF2A    |
| hsa-mir-132-3p | MAP3K3   |
| hsa-mir-132-3p | MMP9     |
| hsa-mir-132-3p | MMP13    |
| hsa-mir-132-3p | NAP1L1   |
| hsa-mir-132-3p | NBN      |
| hsa-mir-132-3p | NDUFB10  |
| hsa-mir-132-3p | OAS2     |
| hsa-mir-132-3p | PFAS     |
| hsa-mir-132-3p | PLAGL2   |
| hsa-mir-132-3p | PLSCR1   |
| hsa-mir-132-3p | MAPK1    |
| hsa-mir-132-3p | PSMA2    |

|                |          |
|----------------|----------|
| hsa-mir-132-3p | PSMD12   |
| hsa-mir-132-3p | PTGS2    |
| hsa-mir-132-3p | RAB5B    |
| hsa-mir-132-3p | RAF1     |
| hsa-mir-132-3p | RASA1    |
| hsa-mir-132-3p | RB1      |
| hsa-mir-132-3p | RPL7     |
| hsa-mir-132-3p | RPS5     |
| hsa-mir-132-3p | S100A1   |
| hsa-mir-132-3p | SDF2     |
| hsa-mir-132-3p | SH3BGRL  |
| hsa-mir-132-3p | SLC2A1   |
| hsa-mir-132-3p | SMN1     |
| hsa-mir-132-3p | SOX4     |
| hsa-mir-132-3p | SOX5     |
| hsa-mir-132-3p | SPAST    |
| hsa-mir-132-3p | SSR3     |
| hsa-mir-132-3p | STAU1    |
| hsa-mir-132-3p | ELOC     |
| hsa-mir-132-3p | TFPI     |
| hsa-mir-132-3p | THBS1    |
| hsa-mir-132-3p | TSPAN6   |
| hsa-mir-132-3p | VDAC2    |
| hsa-mir-132-3p | ZNF711   |
| hsa-mir-132-3p | ZNF148   |
| hsa-mir-132-3p | ZNF236   |
| hsa-mir-132-3p | MLLT10   |
| hsa-mir-132-3p | FXR1     |
| hsa-mir-132-3p | TAF15    |
| hsa-mir-132-3p | GDF5     |
| hsa-mir-132-3p | KDM5C    |
| hsa-mir-132-3p | FZD6     |
| hsa-mir-132-3p | PIP5K1A  |
| hsa-mir-132-3p | PIK3R3   |
| hsa-mir-132-3p | CNTNAP1  |
| hsa-mir-132-3p | PLA2G4C  |
| hsa-mir-132-3p | CD164    |
| hsa-mir-132-3p | ATP6V0E1 |
| hsa-mir-132-3p | USP8     |
| hsa-mir-132-3p | PDLIM7   |
| hsa-mir-132-3p | ARHGAP32 |
| hsa-mir-132-3p | DAZAP2   |
| hsa-mir-132-3p | HS3ST3B1 |
| hsa-mir-132-3p | NR1D2    |

|                 |                |
|-----------------|----------------|
| hsa-mir-132-3p  | ACTR2          |
| hsa-mir-132-3p  | FRY            |
| hsa-mir-132-3p  | SPRY1          |
| hsa-mir-132-3p  | STAG1          |
| hsa-mir-132-3p  | RACK1          |
| hsa-mir-132-3p  | EXOC5          |
| hsa-mir-132-3p  | YKT6           |
| hsa-mir-132-3p  | CD226          |
| hsa-mir-132-3p  | CHL1           |
| hsa-mir-132-3p  | NUP50          |
| hsa-mir-132-3p  | NCKAP1         |
| hsa-mir-132-3p  | PLPBP          |
| hsa-mir-132-3p  | TUSC2          |
| hsa-mir-132-3p  | ZNF652         |
| hsa-mir-132-3p  | RAB18          |
| hsa-mir-132-3p  | TBC1D9         |
| hsa-mir-132-3p  | RRS1           |
| hsa-mir-132-3p  | FBXO28         |
| hsa-mir-132-3p  | ANKRD28        |
| hsa-mir-132-3p  | OTUD3          |
| hsa-mir-132-3p  | CAMSAP2        |
| hsa-mir-132-3p  | CSTF2T         |
| hsa-mir-132-3p  | SMCHD1         |
| hsa-mir-132-3p  | CRTC1          |
| hsa-mir-132-3p  | SIRT1          |
| hsa-mir-132-3p  | OCLN           |
| hsa-mir-132-3p  | RTEL1-TNFRSF6B |
| hsa-mir-376c-3p | DFFA           |
| hsa-mir-376c-3p | TIMM8A         |
| hsa-mir-376c-3p | CENPA          |
| hsa-mir-376c-3p | DAPK1          |
| hsa-mir-376c-3p | GRB2           |
| hsa-mir-376c-3p | IGF1R          |
| hsa-mir-376c-3p | MC2R           |
| hsa-mir-376c-3p | MDM2           |
| hsa-mir-376c-3p | ORC4           |
| hsa-mir-376c-3p | PDPK1          |
| hsa-mir-376c-3p | CDK14          |
| hsa-mir-376c-3p | PRKCH          |
| hsa-mir-376c-3p | RAB1A          |
| hsa-mir-376c-3p | SIAH2          |
| hsa-mir-376c-3p | SKIL           |
| hsa-mir-376c-3p | ELF4           |
| hsa-mir-376c-3p | NR5A2          |

|                 |           |
|-----------------|-----------|
| hsa-mir-376c-3p | TAT       |
| hsa-mir-376c-3p | TGFA      |
| hsa-mir-376c-3p | TGFBR1    |
| hsa-mir-376c-3p | TSPAN6    |
| hsa-mir-376c-3p | UBE2D3    |
| hsa-mir-376c-3p | UGT2B15   |
| hsa-mir-376c-3p | UGT2B17   |
| hsa-mir-376c-3p | VLDLR     |
| hsa-mir-376c-3p | WNT10B    |
| hsa-mir-376c-3p | FZD6      |
| hsa-mir-376c-3p | CBX4      |
| hsa-mir-376c-3p | SNCB      |
| hsa-mir-376c-3p | SP4       |
| hsa-mir-376c-3p | RPS6KA5   |
| hsa-mir-376c-3p | FXR2      |
| hsa-mir-376c-3p | MORF4L2   |
| hsa-mir-376c-3p | BZW1      |
| hsa-mir-376c-3p | SECISBP2L |
| hsa-mir-376c-3p | JADE3     |
| hsa-mir-376c-3p | G3BP1     |
| hsa-mir-376c-3p | ENOX2     |
| hsa-mir-376c-3p | FRS2      |
| hsa-mir-376c-3p | SNRNP27   |
| hsa-mir-376c-3p | CHEK2     |
| hsa-mir-376c-3p | FOXJ3     |
| hsa-mir-376c-3p | NEDD4L    |
| hsa-mir-376c-3p | SYF2      |
| hsa-mir-376c-3p | LSM14A    |
| hsa-mir-376c-3p | FAM8A1    |
| hsa-mir-376c-3p | BCL11A    |
| hsa-mir-376c-3p | TMEM106B  |
| hsa-mir-376c-3p | FNBP1L    |
| hsa-mir-376c-3p | YTHDF1    |
| hsa-mir-376c-3p | PSPC1     |
| hsa-mir-376c-3p | ERO1B     |
| hsa-mir-376c-3p | RTN4      |
| hsa-mir-376c-3p | ZNFX1     |
| hsa-mir-376c-3p | ENPP5     |
| hsa-mir-376c-3p | PRRG3     |
| hsa-mir-376c-3p | METTTL22  |
| hsa-mir-376c-3p | ATAT1     |
| hsa-mir-376c-3p | DNAJB14   |
| hsa-mir-376c-3p | CYTOR     |
| hsa-mir-376c-3p | ACVR1C    |

|                 |           |
|-----------------|-----------|
| hsa-mir-376c-3p | ARHGAP42  |
| hsa-mir-376c-3p | TVP23C    |
| hsa-mir-376c-3p | PRPS1L1   |
| hsa-mir-376c-3p | RBM20     |
| hsa-mir-376c-3p | ZNF829    |
| hsa-mir-376c-3p | ANKRD36   |
| hsa-mir-376c-3p | GOLGA7B   |
| hsa-mir-376c-3p | TNFRSF10B |
| hsa-mir-376c-3p | CLDN1     |
| hsa-mir-376c-3p | MTRNR2L2  |
| hsa-mir-376c-3p | MTRNR2L6  |
| hsa-mir-376c-3p | MTRNR2L8  |
| hsa-mir-376c-3p | ATM       |
| hsa-mir-376c-3p | BBS4      |
| hsa-mir-376c-3p | BCL2      |
| hsa-mir-376c-3p | BMI1      |
| hsa-mir-376c-3p | RUNX2     |
| hsa-mir-376c-3p | CD59      |
| hsa-mir-376c-3p | MTRNR2L1  |
| hsa-mir-376c-3p | ADH4      |
| hsa-mir-376c-3p | ANK1      |
| hsa-mir-376c-3p | TMEM170B  |
| hsa-mir-376c-3p | ARF6      |
| hsa-mir-383-5p  | CAPN6     |
| hsa-mir-383-5p  | DIO1      |
| hsa-mir-383-5p  | GAS1      |
| hsa-mir-383-5p  | IRF1      |
| hsa-mir-383-5p  | KCNJ12    |
| hsa-mir-383-5p  | LDHA      |
| hsa-mir-383-5p  | NPAT      |
| hsa-mir-383-5p  | SLC11A2   |
| hsa-mir-383-5p  | NRF1      |
| hsa-mir-383-5p  | PLCG2     |
| hsa-mir-383-5p  | PPP1R10   |
| hsa-mir-383-5p  | GATA6     |
| hsa-mir-383-5p  | GLUL      |
| hsa-mir-383-5p  | MSH6      |
| hsa-mir-383-5p  | HNRNPH1   |
| hsa-mir-383-5p  | IGF1R     |
| hsa-mir-383-5p  | SRSF2     |
| hsa-mir-383-5p  | TAF13     |
| hsa-mir-383-5p  | TPM3      |
| hsa-mir-383-5p  | TRAF5     |
| hsa-mir-383-5p  | TSN       |

|                |           |
|----------------|-----------|
| hsa-mir-383-5p | VCP       |
| hsa-mir-383-5p | VEGFA     |
| hsa-mir-383-5p | ZFP37     |
| hsa-mir-383-5p | TWF1      |
| hsa-mir-383-5p | RAD21     |
| hsa-mir-383-5p | RHD       |
| hsa-mir-383-5p | RPL41     |
| hsa-mir-383-5p | SFPQ      |
| hsa-mir-383-5p | ADSS      |
| hsa-mir-383-5p | AHR       |
| hsa-mir-383-5p | ALDH1B1   |
| hsa-mir-383-5p | ATP5G3    |
| hsa-mir-383-5p | ATR       |
| hsa-mir-383-5p | CCND1     |
| hsa-mir-383-5p | MED16     |
| hsa-mir-383-5p | SMC2      |
| hsa-mir-383-5p | NCKAP1    |
| hsa-mir-383-5p | ZNF460    |
| hsa-mir-383-5p | PRDX3     |
| hsa-mir-383-5p | CHEK2     |
| hsa-mir-383-5p | SYNRG     |
| hsa-mir-383-5p | CEP162    |
| hsa-mir-383-5p | CLUAP1    |
| hsa-mir-383-5p | GGA2      |
| hsa-mir-383-5p | WBP2      |
| hsa-mir-383-5p | HEBP2     |
| hsa-mir-383-5p | GABARAPL1 |
| hsa-mir-383-5p | APOL2     |
| hsa-mir-383-5p | MOB4      |
| hsa-mir-383-5p | CLIC4     |
| hsa-mir-383-5p | ZBTB20    |
| hsa-mir-383-5p | FBXW8     |
| hsa-mir-383-5p | PCDH11X   |
| hsa-mir-383-5p | TMOD3     |
| hsa-mir-383-5p | ZBTB21    |
| hsa-mir-383-5p | MRNIP     |
| hsa-mir-383-5p | WAC       |
| hsa-mir-383-5p | SUCO      |
| hsa-mir-383-5p | CTDSPL2   |
| hsa-mir-383-5p | TRMT112   |
| hsa-mir-383-5p | NCKIPSD   |
| hsa-mir-383-5p | CLIC6     |
| hsa-mir-383-5p | RBM27     |
| hsa-mir-383-5p | DDIT4     |



|                |            |
|----------------|------------|
| hsa-mir-383-5p | WDR5B      |
| hsa-mir-383-5p | TRPM7      |
| hsa-mir-383-5p | FNBP1L     |
| hsa-mir-383-5p | C5orf22    |
| hsa-mir-383-5p | YOD1       |
| hsa-mir-383-5p | TMEM30A    |
| hsa-mir-383-5p | CENPN      |
| hsa-mir-383-5p | SLC22A23   |
| hsa-mir-383-5p | CRTC3      |
| hsa-mir-383-5p | RSG1       |
| hsa-mir-383-5p | SH3TC2     |
| hsa-mir-383-5p | PCNX2      |
| hsa-mir-383-5p | KLHL15     |
| hsa-mir-383-5p | GDPD5      |
| hsa-mir-383-5p | PCDH11Y    |
| hsa-mir-383-5p | ATG10      |
| hsa-mir-383-5p | GTPBP3     |
| hsa-mir-383-5p | UNC119B    |
| hsa-mir-383-5p | ZIC5       |
| hsa-mir-383-5p | ANKRD44    |
| hsa-mir-383-5p | DSEL       |
| hsa-mir-383-5p | SCAMP4     |
| hsa-mir-383-5p | SGK494     |
| hsa-mir-383-5p | TRIM71     |
| hsa-mir-383-5p | TMEM199    |
| hsa-mir-383-5p | DIRAS1     |
| hsa-mir-383-5p | RIMBP3C    |
| hsa-mir-383-5p | CREBRF     |
| hsa-mir-383-5p | UBN2       |
| hsa-mir-383-5p | ZDHHC24    |
| hsa-mir-383-5p | PLA2G4D    |
| hsa-mir-383-5p | ZNF699     |
| hsa-mir-383-5p | PEAR1      |
| hsa-mir-383-5p | PICSAR     |
| hsa-mir-383-5p | MICA       |
| hsa-mir-383-5p | HSPE1-MOB4 |
| hsa-mir-383-5p | KIAA0100   |
| hsa-mir-383-5p | SLC35E2    |
| hsa-mir-383-5p | EDF1       |
| hsa-mir-383-5p | TNFSF13    |
| hsa-mir-383-5p | ZMYM2      |
| hsa-mir-383-5p | DYRK2      |
| hsa-mir-383-5p | GOSR1      |
| hsa-mir-383-5p | TMEM59     |

|                |          |
|----------------|----------|
| hsa-mir-383-5p | DDX21    |
| hsa-mir-383-5p | GRAP2    |
| hsa-mir-383-5p | IER2     |
| hsa-mir-505-3p | OGFR     |
| hsa-mir-505-3p | ZNF652   |
| hsa-mir-505-3p | SUB1     |
| hsa-mir-505-3p | EBNA1BP2 |
| hsa-mir-505-3p | LSM4     |
| hsa-mir-505-3p | PTCD1    |
| hsa-mir-505-3p | PLEKHG3  |
| hsa-mir-505-3p | GIGYF2   |
| hsa-mir-505-3p | SERBP1   |
| hsa-mir-505-3p | INTU     |
| hsa-mir-505-3p | KCNMB4   |
| hsa-mir-505-3p | DROSHA   |
| hsa-mir-505-3p | TMOD3    |
| hsa-mir-505-3p | FAHD2A   |
| hsa-mir-505-3p | FIS1     |
| hsa-mir-505-3p | RSRC1    |
| hsa-mir-505-3p | ASB1     |
| hsa-mir-505-3p | IL20RB   |
| hsa-mir-505-3p | TREM1    |
| hsa-mir-505-3p | PUS7     |
| hsa-mir-505-3p | GNL3L    |
| hsa-mir-505-3p | KLHDC4   |
| hsa-mir-505-3p | FNBP1L   |
| hsa-mir-505-3p | CWC25    |
| hsa-mir-505-3p | YTHDF1   |
| hsa-mir-505-3p | ATG2B    |
| hsa-mir-505-3p | RBM28    |
| hsa-mir-505-3p | MAP1S    |
| hsa-mir-505-3p | FANCI    |
| hsa-mir-505-3p | MAML3    |
| hsa-mir-505-3p | OTUD5    |
| hsa-mir-505-3p | ZFP64    |
| hsa-mir-505-3p | CBWD1    |
| hsa-mir-505-3p | BAHD1    |
| hsa-mir-505-3p | RUFY3    |
| hsa-mir-505-3p | DIP2C    |
| hsa-mir-505-3p | RRP1B    |
| hsa-mir-505-3p | GRAMD4   |
| hsa-mir-505-3p | CLUH     |
| hsa-mir-505-3p | BICD2    |
| hsa-mir-505-3p | PPP1R13B |

|                |          |
|----------------|----------|
| hsa-mir-505-3p | ACAP2    |
| hsa-mir-505-3p | BACE1    |
| hsa-mir-505-3p | PISD     |
| hsa-mir-505-3p | PSMD10   |
| hsa-mir-505-3p | PTPRJ    |
| hsa-mir-505-3p | REST     |
| hsa-mir-505-3p | RGS2     |
| hsa-mir-505-3p | RPL9     |
| hsa-mir-505-3p | RPLP0    |
| hsa-mir-505-3p | RPS15    |
| hsa-mir-505-3p | SALL1    |
| hsa-mir-505-3p | SCD      |
| hsa-mir-505-3p | SEC13    |
| hsa-mir-505-3p | SRSF1    |
| hsa-mir-505-3p | SOD2     |
| hsa-mir-505-3p | SOX11    |
| hsa-mir-505-3p | SYT4     |
| hsa-mir-505-3p | TAF9     |
| hsa-mir-505-3p | TCF7L2   |
| hsa-mir-505-3p | TGFA     |
| hsa-mir-505-3p | TGFBR2   |
| hsa-mir-505-3p | THOP1    |
| hsa-mir-505-3p | TLE3     |
| hsa-mir-505-3p | TNFAIP3  |
| hsa-mir-505-3p | TP53BP1  |
| hsa-mir-505-3p | TPBG     |
| hsa-mir-505-3p | TPD52    |
| hsa-mir-505-3p | TUBB2A   |
| hsa-mir-505-3p | TXNRD1   |
| hsa-mir-505-3p | UBE2D3   |
| hsa-mir-505-3p | UQCRRS1  |
| hsa-mir-505-3p | UTRN     |
| hsa-mir-505-3p | VBP1     |
| hsa-mir-505-3p | ZNF208   |
| hsa-mir-505-3p | FZD5     |
| hsa-mir-505-3p | DGS2     |
| hsa-mir-505-3p | HIST1H4D |
| hsa-mir-505-3p | LTBP4    |
| hsa-mir-505-3p | NCK2     |
| hsa-mir-505-3p | IRS4     |
| hsa-mir-505-3p | SLC25A12 |
| hsa-mir-505-3p | RTL8C    |
| hsa-mir-505-3p | BTRC     |
| hsa-mir-505-3p | BTAF1    |

|                |         |
|----------------|---------|
| hsa-mir-505-3p | PRC1    |
| hsa-mir-505-3p | MTA2    |
| hsa-mir-505-3p | SNAP29  |
| hsa-mir-505-3p | MORF4L2 |
| hsa-mir-505-3p | SOCS5   |
| hsa-mir-505-3p | MDC1    |
| hsa-mir-505-3p | PDE4DIP |
| hsa-mir-505-3p | KDM4A   |
| hsa-mir-505-3p | BMS1    |
| hsa-mir-505-3p | PJA2    |
| hsa-mir-505-3p | TLK1    |
| hsa-mir-505-3p | TRIM28  |
| hsa-mir-505-3p | ALYREF  |
| hsa-mir-505-3p | TUBB3   |
| hsa-mir-505-3p | NDRG1   |
| hsa-mir-505-3p | ZBTB18  |
| hsa-mir-505-3p | HMGN4   |
| hsa-mir-505-3p | TM9SF1  |
| hsa-mir-505-3p | CCT7    |
| hsa-mir-505-3p | PAICS   |
| hsa-mir-505-3p | STAMBP  |
| hsa-mir-505-3p | SPINT2  |
| hsa-mir-505-3p | DMRT2   |
| hsa-mir-505-3p | CD226   |
| hsa-mir-505-3p | PNMA2   |
| hsa-mir-505-3p | GRK3    |
| hsa-mir-505-3p | AMFR    |
| hsa-mir-505-3p | XIAP    |
| hsa-mir-505-3p | RHOH    |
| hsa-mir-505-3p | BMP2    |
| hsa-mir-505-3p | CANX    |
| hsa-mir-505-3p | CCND2   |
| hsa-mir-505-3p | CD47    |
| hsa-mir-505-3p | CDC5L   |
| hsa-mir-505-3p | CHEK1   |
| hsa-mir-505-3p | COL4A1  |
| hsa-mir-505-3p | CSE1L   |
| hsa-mir-505-3p | CSF1    |
| hsa-mir-505-3p | CSNK1A1 |
| hsa-mir-505-3p | CTSZ    |
| hsa-mir-505-3p | DDX3X   |
| hsa-mir-505-3p | DDX6    |
| hsa-mir-505-3p | DHX9    |
| hsa-mir-505-3p | TSC22D3 |

|                |          |
|----------------|----------|
| hsa-mir-505-3p | EEF1A1   |
| hsa-mir-505-3p | EIF1AX   |
| hsa-mir-505-3p | ELF4     |
| hsa-mir-505-3p | ELK3     |
| hsa-mir-505-3p | EPHA4    |
| hsa-mir-505-3p | FANCD2   |
| hsa-mir-505-3p | XRCC6    |
| hsa-mir-505-3p | GAS1     |
| hsa-mir-505-3p | GGCX     |
| hsa-mir-505-3p | GPLD1    |
| hsa-mir-505-3p | H3F3B    |
| hsa-mir-505-3p | HDLBP    |
| hsa-mir-505-3p | HNRNPF   |
| hsa-mir-505-3p | HOXA9    |
| hsa-mir-505-3p | HSPA1B   |
| hsa-mir-505-3p | ID4      |
| hsa-mir-505-3p | IGF1     |
| hsa-mir-505-3p | EIF6     |
| hsa-mir-505-3p | JARID2   |
| hsa-mir-505-3p | KCNH1    |
| hsa-mir-505-3p | TNPO1    |
| hsa-mir-505-3p | LGALS8   |
| hsa-mir-505-3p | LIMS1    |
| hsa-mir-505-3p | SMAD2    |
| hsa-mir-505-3p | MAZ      |
| hsa-mir-505-3p | DNAJB9   |
| hsa-mir-505-3p | MKI67    |
| hsa-mir-505-3p | MYBPC1   |
| hsa-mir-505-3p | MYBL2    |
| hsa-mir-505-3p | MYH10    |
| hsa-mir-505-3p | NPTX1    |
| hsa-mir-505-3p | ORC2     |
| hsa-mir-505-3p | OSBP     |
| hsa-mir-505-3p | POLG     |
| hsa-mir-505-3p | POLR2D   |
| hsa-mir-505-3p | PPP1CB   |
| hsa-mir-505-3p | PRKCA    |
| hsa-mir-505-3p | MYO19    |
| hsa-mir-505-3p | EDEM3    |
| hsa-mir-505-3p | TET1     |
| hsa-mir-505-3p | VMP1     |
| hsa-mir-505-3p | TMEM185A |
| hsa-mir-505-3p | PRRC2B   |
| hsa-mir-505-3p | FUT10    |

|                |          |
|----------------|----------|
| hsa-mir-505-3p | MICALCL  |
| hsa-mir-505-3p | TRIM4    |
| hsa-mir-505-3p | KBTBD6   |
| hsa-mir-505-3p | MCFD2    |
| hsa-mir-505-3p | ZNF845   |
| hsa-mir-505-3p | TMEM132B |
| hsa-mir-505-3p | ZNF511   |
| hsa-mir-505-3p | ANKRD13B |
| hsa-mir-505-3p | GJD3     |
| hsa-mir-505-3p | TPRG1L   |
| hsa-mir-505-3p | TYW5     |
| hsa-mir-505-3p | NUDT16   |
| hsa-mir-505-3p | RIMS4    |
| hsa-mir-505-3p | TMEM37   |
| hsa-mir-505-3p | SRXN1    |
| hsa-mir-505-3p | FBXL16   |
| hsa-mir-505-3p | SLC5A12  |
| hsa-mir-505-3p | DGKH     |
| hsa-mir-505-3p | PRICKLE2 |
| hsa-mir-505-3p | FUT11    |
| hsa-mir-505-3p | TUBB     |
| hsa-mir-505-3p | CBWD5    |
| hsa-mir-505-3p | HNRNPA3  |
| hsa-mir-505-3p | OPN5     |
| hsa-mir-505-3p | ZBTB9    |
| hsa-mir-505-3p | FBXO33   |
| hsa-mir-505-3p | NEGR1    |
| hsa-mir-505-3p | C5orf64  |
| hsa-mir-505-3p | ANKRD13D |
| hsa-mir-505-3p | ACER2    |
| hsa-mir-505-3p | ZNF445   |
| hsa-mir-505-3p | FAM89A   |
| hsa-mir-505-3p | GJB7     |
| hsa-mir-505-3p | SOGA3    |
| hsa-mir-505-3p | BEND4    |
| hsa-mir-505-3p | HIST2H4B |
| hsa-mir-505-3p | NBPF8    |
| hsa-mir-505-3p | CASTOR2  |
| hsa-mir-505-3p | PET117   |
| hsa-mir-505-3p | TNRC6C   |
| hsa-mir-505-3p | FAM160B1 |
| hsa-mir-505-3p | THADA    |
| hsa-mir-505-3p | UBE2O    |
| hsa-mir-505-3p | NUCKS1   |

|                |          |
|----------------|----------|
| hsa-mir-505-3p | YTHDC2   |
| hsa-mir-505-3p | GID4     |
| hsa-mir-505-3p | NABP2    |
| hsa-mir-505-3p | QSER1    |
| hsa-mir-505-3p | C15orf39 |
| hsa-mir-505-3p | PRDM10   |
| hsa-mir-421    | ZFP36L2  |
| hsa-mir-421    | CASP2    |
| hsa-mir-421    | GRK3     |
| hsa-mir-421    | AP1G1    |
| hsa-mir-421    | SLC25A6  |
| hsa-mir-421    | XIAP     |
| hsa-mir-421    | RHOB     |
| hsa-mir-421    | RND3     |
| hsa-mir-421    | RHOH     |
| hsa-mir-421    | ATM      |
| hsa-mir-421    | ATP6V0C  |
| hsa-mir-421    | DUSP3    |
| hsa-mir-421    | E2F6     |
| hsa-mir-421    | CASP3    |
| hsa-mir-421    | CDH1     |
| hsa-mir-421    | CEBPB    |
| hsa-mir-421    | CEBPD    |
| hsa-mir-421    | COL4A1   |
| hsa-mir-421    | COPA     |
| hsa-mir-421    | CSE1L    |
| hsa-mir-421    | CSNK1A1  |
| hsa-mir-421    | DDX3X    |
| hsa-mir-421    | DFFB     |
| hsa-mir-421    | TSC22D3  |
| hsa-mir-421    | HTT      |
| hsa-mir-421    | HOXA9    |
| hsa-mir-421    | HSP90AA1 |
| hsa-mir-421    | ID4      |
| hsa-mir-421    | IGF1     |
| hsa-mir-421    | INPP4A   |
| hsa-mir-421    | ITPK1    |
| hsa-mir-421    | JARID2   |
| hsa-mir-421    | KCNN3    |
| hsa-mir-421    | LBR      |
| hsa-mir-421    | LIMS1    |
| hsa-mir-421    | SMAD4    |
| hsa-mir-421    | MAZ      |
| hsa-mir-421    | CD46     |

|             |         |
|-------------|---------|
| hsa-mir-421 | FOXO4   |
| hsa-mir-421 | MTAP    |
| hsa-mir-421 | MYBPC1  |
| hsa-mir-421 |         |
| hsa-mir-421 | NFE2L1  |
| hsa-mir-421 | NPM1    |
| hsa-mir-421 | NPTX1   |
| hsa-mir-421 | PDPK1   |
| hsa-mir-421 | PHKA1   |
| hsa-mir-421 | POLG    |
| hsa-mir-421 | POLR2D  |
| hsa-mir-421 | PPP2CB  |
| hsa-mir-421 | PRCC    |
| hsa-mir-421 | MAPK8   |
| hsa-mir-421 | PSME1   |
| hsa-mir-421 | EEF1A1  |
| hsa-mir-421 | EIF4A1  |
| hsa-mir-421 | EIF4G2  |
| hsa-mir-421 | FAT2    |
| hsa-mir-421 | GALK2   |
| hsa-mir-421 | GAS1    |
| hsa-mir-421 | NR6A1   |
| hsa-mir-421 | GCSH    |
| hsa-mir-421 | GRK6    |
| hsa-mir-421 | NR3C1   |
| hsa-mir-421 | HADHA   |
| hsa-mir-421 | VMP1    |
| hsa-mir-421 | FAM172A |
| hsa-mir-421 | PARP10  |
| hsa-mir-421 | RAB2B   |
| hsa-mir-421 | TRIM4   |
| hsa-mir-421 | ZNF30   |
| hsa-mir-421 | MCFD2   |
| hsa-mir-421 | RASL10B |
| hsa-mir-421 | NXPE3   |
| hsa-mir-421 | ASB16   |
| hsa-mir-421 | SFXN1   |
| hsa-mir-421 | PAXB1   |
| hsa-mir-421 | FAM122A |
| hsa-mir-421 | GJD3    |
| hsa-mir-421 | TPRG1L  |
| hsa-mir-421 | FAM168B |
| hsa-mir-421 | RIMS4   |
| hsa-mir-421 | TMEM37  |

2-Sep



|             |          |
|-------------|----------|
| hsa-mir-421 | FBXL16   |
| hsa-mir-421 | GAREM2   |
| hsa-mir-421 | CREBRF   |
| hsa-mir-421 | PPTC7    |
| hsa-mir-421 | DGKH     |
| hsa-mir-421 | PRICKLE2 |
| hsa-mir-421 | OTUD1    |
| hsa-mir-421 | CBWD5    |
| hsa-mir-421 | NEGR1    |
| hsa-mir-421 | SREK1IP1 |
| hsa-mir-421 | RGMB     |
| hsa-mir-421 | ZNF678   |
| hsa-mir-421 | CCDC39   |
| hsa-mir-421 | FAM89A   |
| hsa-mir-421 | GJB7     |
| hsa-mir-421 | C5orf46  |
| hsa-mir-421 | RBMXL1   |
| hsa-mir-421 | HIST2H4B |
| hsa-mir-421 | NBPF8    |
| hsa-mir-421 | CASTOR2  |
| hsa-mir-421 | DDX20    |
| hsa-mir-421 | ATXN2L   |
| hsa-mir-421 | ZNF652   |
| hsa-mir-421 | MLXIP    |
| hsa-mir-421 | BAHD1    |
| hsa-mir-421 | CNOT1    |
| hsa-mir-421 | PHLPP2   |
| hsa-mir-421 | NCDN     |
| hsa-mir-421 | RHOBTB2  |
| hsa-mir-421 | ZC3H7B   |
| hsa-mir-421 | DNAJC16  |
| hsa-mir-421 | SMCHD1   |
| hsa-mir-421 | PPP1R13B |
| hsa-mir-421 | SPECC1L  |
| hsa-mir-421 | LARS2    |
| hsa-mir-421 | SIRT3    |
| hsa-mir-421 | CBX7     |
| hsa-mir-421 | ACOT9    |
| hsa-mir-421 | ZMYND8   |
| hsa-mir-421 | BACE1    |
| hsa-mir-421 | FKBP8    |
| hsa-mir-421 | LSM4     |
| hsa-mir-421 | NIPBL    |
| hsa-mir-421 | RAB26    |

|             |          |
|-------------|----------|
| hsa-mir-421 | NSL1     |
| hsa-mir-421 | FAM32A   |
| hsa-mir-421 | AGO1     |
| hsa-mir-421 | FAM155B  |
| hsa-mir-421 | AFF4     |
| hsa-mir-421 | INTU     |
| hsa-mir-421 | EIF3K    |
| hsa-mir-421 | KCNMB4   |
| hsa-mir-421 | RACGAP1  |
| hsa-mir-421 | LMCD1    |
| hsa-mir-421 | GMNN     |
| hsa-mir-421 | RPL26L1  |
| hsa-mir-421 | ZNF219   |
| hsa-mir-421 | DNAJC27  |
| hsa-mir-421 | RSRC1    |
| hsa-mir-421 | AMZ2     |
| hsa-mir-421 | RNF138   |
| hsa-mir-421 | TREM1    |
| hsa-mir-421 | VSIG10   |
| hsa-mir-421 | PQLC2    |
| hsa-mir-421 | YTHDF1   |
| hsa-mir-421 | GID8     |
| hsa-mir-421 | VPS37C   |
| hsa-mir-421 | ATG2B    |
| hsa-mir-421 | PNPO     |
| hsa-mir-421 | RIF1     |
| hsa-mir-421 | MIS18BP1 |
| hsa-mir-421 | LIN7C    |
| hsa-mir-421 | COPRS    |
| hsa-mir-421 | ZNF280C  |
| hsa-mir-421 | NDC1     |
| hsa-mir-421 | DOK4     |
| hsa-mir-421 | TSR1     |
| hsa-mir-421 | ZFP64    |
| hsa-mir-421 | CBWD1    |
| hsa-mir-421 | CMAS     |
| hsa-mir-421 | DUS3L    |
| hsa-mir-421 | CDC42SE2 |
| hsa-mir-421 | PARP11   |
| hsa-mir-421 | RALGAPB  |
| hsa-mir-421 | SENP7    |
| hsa-mir-421 | ISY1     |
| hsa-mir-421 | TNRC6C   |
| hsa-mir-421 | FAM160B1 |

|             |          |
|-------------|----------|
| hsa-mir-421 | CREBZF   |
| hsa-mir-421 | ARHGAP22 |
| hsa-mir-421 | NCAPG    |
| hsa-mir-421 | PCNX4    |
| hsa-mir-421 | RANBP2   |
| hsa-mir-421 | RBBP7    |
| hsa-mir-421 | REST     |
| hsa-mir-421 | TRIM27   |
| hsa-mir-421 | RGR      |
| hsa-mir-421 | RGS2     |
| hsa-mir-421 | RPL18A   |
| hsa-mir-421 | RPS10    |
| hsa-mir-421 | RPS18    |
| hsa-mir-421 | RREB1    |
| hsa-mir-421 | SCD      |
| hsa-mir-421 | SRSF7    |
| hsa-mir-421 | SLC6A13  |
| hsa-mir-421 | SLIT1    |
| hsa-mir-421 | SOD2     |
| hsa-mir-421 | SRP9     |
| hsa-mir-421 | SRPRA    |
| hsa-mir-421 | SYT4     |
| hsa-mir-421 | TAF9     |
| hsa-mir-421 | TCF7L2   |
| hsa-mir-421 | TUBB2A   |
| hsa-mir-421 | TXNRD1   |
| hsa-mir-421 | UBE2D3   |
| hsa-mir-421 | UQCRRS1  |
| hsa-mir-421 | ZNF208   |
| hsa-mir-421 | ZXDA     |
| hsa-mir-421 | RASAL1   |
| hsa-mir-421 | AP3B1    |
| hsa-mir-421 | USO1     |
| hsa-mir-421 | BTRC     |
| hsa-mir-421 | SLC28A1  |
| hsa-mir-421 | VAPA     |
| hsa-mir-421 | GOSR1    |
| hsa-mir-421 | TTC37    |
| hsa-mir-421 | CEP57    |
| hsa-mir-421 | KIAA0100 |
| hsa-mir-421 | TLK1     |
| hsa-mir-421 | DDX39A   |
| hsa-mir-421 | TUBA1B   |
| hsa-mir-421 | SLC9A6   |

|                |           |
|----------------|-----------|
| hsa-mir-421    | CAP1      |
| hsa-mir-421    | TM9SF1    |
| hsa-mir-421    | P3H4      |
| hsa-mir-421    | SPINT2    |
| hsa-mir-421    | CD226     |
| hsa-mir-421    | MTHFD2    |
| hsa-mir-421    | PPARGC1A  |
| hsa-mir-421    | MSL3      |
| hsa-mir-421    | CDC37     |
| hsa-mir-421    | TET1      |
| hsa-mir-421    | CD276     |
| hsa-mir-421    | PRR7      |
| hsa-mir-421    | GFOD2     |
| hsa-mir-421    | AHNAK     |
| hsa-mir-421    | TMEM109   |
| hsa-mir-421    | MRPL38    |
| hsa-mir-421    | GID4      |
| hsa-mir-421    | FBXO11    |
| hsa-mir-421    | RAB11FIP1 |
| hsa-mir-421    | QSER1     |
| hsa-mir-421    | CTC1      |
| hsa-mir-876-5p | EMP2      |
| hsa-mir-876-5p | EPB41L1   |
| hsa-mir-876-5p | P2RX7     |
| hsa-mir-876-5p | P2RY1     |
| hsa-mir-876-5p | PER1      |
| hsa-mir-876-5p | PTPN14    |
| hsa-mir-876-5p | RORA      |
| hsa-mir-876-5p | FOLR1     |
| hsa-mir-876-5p | FOXA2     |
| hsa-mir-876-5p | HSPD1     |
| hsa-mir-876-5p | HTR7      |
| hsa-mir-876-5p | IMPG1     |
| hsa-mir-876-5p | MAOB      |
| hsa-mir-876-5p | MAT2A     |
| hsa-mir-876-5p | DNAJB9    |
| hsa-mir-876-5p | HIST1H3E  |
| hsa-mir-876-5p | RGS5      |
| hsa-mir-876-5p | AKR7A2    |
| hsa-mir-876-5p | TIMELESS  |
| hsa-mir-876-5p | ABCG2     |
| hsa-mir-876-5p | RPS16     |
| hsa-mir-876-5p | ATXN1     |
| hsa-mir-876-5p | SSR2      |

|                |          |
|----------------|----------|
| hsa-mir-876-5p | AURKA    |
| hsa-mir-876-5p | TAPBP    |
| hsa-mir-876-5p | TPM4     |
| hsa-mir-876-5p | ZNF131   |
| hsa-mir-876-5p | SLC10A3  |
| hsa-mir-876-5p | ATP5F1   |
| hsa-mir-876-5p | CALM2    |
| hsa-mir-876-5p | CAPZA1   |
| hsa-mir-876-5p | CLCN6    |
| hsa-mir-876-5p | PYGO1    |
| hsa-mir-876-5p | VPS4A    |
| hsa-mir-876-5p | TOR1B    |
| hsa-mir-876-5p | TMX2     |
| hsa-mir-876-5p | C1RL     |
| hsa-mir-876-5p | PGPEP1   |
| hsa-mir-876-5p | RPP25    |
| hsa-mir-876-5p | RFWD3    |
| hsa-mir-876-5p | TXLNG    |
| hsa-mir-876-5p | ALG1     |
| hsa-mir-876-5p | C8orf4   |
| hsa-mir-876-5p | TAOK1    |
| hsa-mir-876-5p | ANO8     |
| hsa-mir-876-5p | PLEKHG2  |
| hsa-mir-876-5p | METTLL16 |
| hsa-mir-876-5p | CTC1     |
| hsa-mir-876-5p | RBM4B    |
| hsa-mir-876-5p | USP48    |
| hsa-mir-876-5p | ZNF502   |
| hsa-mir-876-5p | AGAP1    |
| hsa-mir-876-5p | BRI3BP   |
| hsa-mir-876-5p | PPM1K    |
| hsa-mir-876-5p | FUT11    |
| hsa-mir-876-5p | ZNF707   |
| hsa-mir-876-5p | S100A7A  |
| hsa-mir-876-5p | RBMXL1   |
| hsa-mir-876-5p | ARGFX    |
| hsa-mir-876-5p | C8orf58  |
| hsa-mir-876-5p | TOMM20   |
| hsa-mir-876-5p | WASF2    |
| hsa-mir-876-5p | ZNF256   |
| hsa-mir-876-5p | NDRG1    |
| hsa-mir-876-5p | PRDX3    |
| hsa-mir-876-5p | CBX1     |
| hsa-mir-876-5p | ZNF277   |

|                |          |
|----------------|----------|
| hsa-mir-876-5p | IKZF2    |
| hsa-mir-876-5p | ZNF507   |
| hsa-mir-876-5p | TTLL12   |
| hsa-mir-876-5p | MESD     |
| hsa-mir-876-5p | KIAA0895 |
| hsa-mir-3167   | MAOB     |
| hsa-mir-3167   | MAT2A    |
| hsa-mir-3167   | DNAJB9   |
| hsa-mir-3167   | P2RX7    |
| hsa-mir-3167   | P2RY1    |
| hsa-mir-3167   | PER1     |
| hsa-mir-3167   | PTPN14   |
| hsa-mir-3167   | RORA     |
| hsa-mir-3167   | RPS16    |
| hsa-mir-3167   | ATXN1    |
| hsa-mir-3167   | SSR2     |
| hsa-mir-3167   | AURKA    |
| hsa-mir-3167   | TAPBP    |
| hsa-mir-3167   | TPM4     |
| hsa-mir-3167   | ZNF131   |
| hsa-mir-3167   | SLC10A3  |
| hsa-mir-3167   | HIST1H3E |
| hsa-mir-3167   | RGS5     |
| hsa-mir-3167   | AKR7A2   |
| hsa-mir-3167   | TIMELESS |
| hsa-mir-3167   | ABCG2    |
| hsa-mir-3167   | TOMM20   |
| hsa-mir-3167   | WASF2    |
| hsa-mir-3167   | ZNF256   |
| hsa-mir-3167   | NDRG1    |
| hsa-mir-3167   | PRDX3    |
| hsa-mir-3167   | CBX1     |
| hsa-mir-3167   | ZNF277   |
| hsa-mir-3167   | IKZF2    |
| hsa-mir-3167   | ZNF507   |
| hsa-mir-3167   | TTLL12   |
| hsa-mir-3167   | MESD     |
| hsa-mir-3167   | KIAA0895 |
| hsa-mir-3167   | PYGO1    |
| hsa-mir-3167   | VPS4A    |
| hsa-mir-3167   | TOR1B    |
| hsa-mir-3167   | TMX2     |
| hsa-mir-3167   | C1RL     |
| hsa-mir-3167   | PGPEP1   |

|              |          |
|--------------|----------|
| hsa-mir-3167 | RPP25    |
| hsa-mir-3167 | RFWD3    |
| hsa-mir-3167 | TXLNG    |
| hsa-mir-3167 | ALG1     |
| hsa-mir-3167 | C8orf4   |
| hsa-mir-3167 | TAOK1    |
| hsa-mir-3167 | ANO8     |
| hsa-mir-3167 | PLEKHG2  |
| hsa-mir-3167 | METTLL16 |
| hsa-mir-3167 | CTC1     |
| hsa-mir-3167 | RBM4B    |
| hsa-mir-3167 | USP48    |
| hsa-mir-3167 | SRRM4    |
| hsa-mir-3167 | ZNF502   |
| hsa-mir-3167 | AGAP1    |
| hsa-mir-3167 | BRI3BP   |
| hsa-mir-3167 | PPM1K    |
| hsa-mir-3167 | FUT11    |
| hsa-mir-3167 | ZNF707   |
| hsa-mir-3167 | S100A7A  |
| hsa-mir-3167 | RBMXL1   |
| hsa-mir-3167 | ARGFX    |
| hsa-mir-3167 | C8orf58  |
| hsa-mir-3167 | CLCN6    |
| hsa-mir-3167 | ATP5F1   |
| hsa-mir-3167 | CALM2    |
| hsa-mir-3167 | CAPZA1   |
| hsa-mir-3167 | FOXA2    |
| hsa-mir-3167 | EMP2     |
| hsa-mir-3167 | EPB41L1  |
| hsa-mir-3167 | FOLR1    |
| hsa-mir-3167 | HSPD1    |
| hsa-mir-3167 | HTR7     |
| hsa-mir-3167 | IMPG1    |
| hsa-mir-4428 | UBE2G1   |
| hsa-mir-4428 | EIF4H    |
| hsa-mir-4428 | SF1      |
| hsa-mir-4428 | ZNF8     |
| hsa-mir-4428 | ZNF84    |
| hsa-mir-4428 | LUZP1    |
| hsa-mir-4428 | TAGLN2   |
| hsa-mir-4428 | TP63     |
| hsa-mir-4428 | KCNK5    |
| hsa-mir-4428 | VAMP8    |

|              |          |
|--------------|----------|
| hsa-mir-4428 | CD164    |
| hsa-mir-4428 | NOLC1    |
| hsa-mir-4428 | GTF3C4   |
| hsa-mir-4428 | TGFBRAP1 |
| hsa-mir-4428 | SH3PXD2A |
| hsa-mir-4428 | VGLL4    |
| hsa-mir-4428 | TRAM2    |
| hsa-mir-4428 | SPRY1    |
| hsa-mir-4428 | SPON2    |
| hsa-mir-4428 | VAV3     |
| hsa-mir-4428 | GIPC1    |
| hsa-mir-4428 | ARPP19   |
| hsa-mir-4428 | ZNF273   |
| hsa-mir-4428 | RALBP1   |
| hsa-mir-4428 | MAPRE3   |
| hsa-mir-4428 | MRPS27   |
| hsa-mir-4428 | FAM168A  |
| hsa-mir-4428 | SLC7A8   |
| hsa-mir-4428 | PSD4     |
| hsa-mir-4428 | CD2AP    |
| hsa-mir-4428 | CADM1    |
| hsa-mir-4428 | ANAPC13  |
| hsa-mir-4428 | ZNF385A  |
| hsa-mir-4428 | CNTNAP2  |
| hsa-mir-4428 | SLITRK5  |
| hsa-mir-4428 | GPKOW    |
| hsa-mir-4428 | A1CF     |
| hsa-mir-4428 | RAX      |
| hsa-mir-4428 | TMED5    |
| hsa-mir-4428 | SLC35C2  |
| hsa-mir-4428 | WAC      |
| hsa-mir-4428 | CSNK1G1  |
| hsa-mir-4428 | KLHL24   |
| hsa-mir-4428 | SAMD4B   |
| hsa-mir-4428 | STRADB   |
| hsa-mir-4428 | RBM38    |
| hsa-mir-4428 | IWS1     |
| hsa-mir-4428 | RUFY2    |
| hsa-mir-4428 | PSENN    |
| hsa-mir-4428 | EIF5A2   |
| hsa-mir-4428 | NUFIP2   |
| hsa-mir-4428 | PLA2G2F  |
| hsa-mir-4428 |          |
| hsa-mir-4428 | CREB3L2  |

1-Mar



|              |           |
|--------------|-----------|
| hsa-mir-4428 | METTL22   |
| hsa-mir-4428 | C1orf115  |
| hsa-mir-4428 | MYH14     |
| hsa-mir-4428 | NOL10     |
| hsa-mir-4428 | TTYH3     |
| hsa-mir-4428 | ARHGAP39  |
| hsa-mir-4428 | RAB1B     |
| hsa-mir-4428 | MIDN      |
| hsa-mir-4428 | RASL10B   |
| hsa-mir-4428 | MRRF      |
| hsa-mir-4428 | RP1L1     |
| hsa-mir-4428 | PRRT2     |
| hsa-mir-4428 | MB21D1    |
| hsa-mir-4428 | SNAP47    |
| hsa-mir-4428 | SLC16A10  |
| hsa-mir-4428 | C2CD4C    |
| hsa-mir-4428 | TCHHL1    |
| hsa-mir-4428 | ARHGAP42  |
| hsa-mir-4428 | DUSP18    |
| hsa-mir-4428 | PPP1R1C   |
| hsa-mir-4428 | AMOTL1    |
| hsa-mir-4428 | ZFP1      |
| hsa-mir-4428 | TTLL9     |
| hsa-mir-4428 | TOGARAM2  |
| hsa-mir-4428 | TXLNA     |
| hsa-mir-4428 | LGI3      |
| hsa-mir-4428 | SIAH3     |
| hsa-mir-4428 | CAVIN1    |
| hsa-mir-4428 | ZADH2     |
| hsa-mir-4428 | MSL1      |
| hsa-mir-4428 | PABPC1L2A |
| hsa-mir-4428 | LCE1B     |
| hsa-mir-4428 | PLEKHM3   |
| hsa-mir-4428 | BEND4     |
| hsa-mir-4428 | PABPC1L2B |
| hsa-mir-4428 | LINC01556 |
| hsa-mir-4428 | ANXA11    |
| hsa-mir-4428 | CALM3     |
| hsa-mir-4428 | CALR      |
| hsa-mir-4428 | CASP2     |
| hsa-mir-4428 | CCND2     |
| hsa-mir-4428 | CHRM3     |
| hsa-mir-4428 | DDX6      |
| hsa-mir-4428 | DFFB      |

|                 |        |
|-----------------|--------|
| hsa-mir-4428    | COCH   |
| hsa-mir-4428    | DLX6   |
| hsa-mir-4428    | EFNB1  |
| hsa-mir-4428    | ELF3   |
| hsa-mir-4428    | EN2    |
| hsa-mir-4428    | ENSA   |
| hsa-mir-4428    | EP300  |
| hsa-mir-4428    | FPR1   |
| hsa-mir-4428    | GRSF1  |
| hsa-mir-4428    | FOXA1  |
| hsa-mir-4428    | IGF2   |
| hsa-mir-4428    | INCENP |
| hsa-mir-4428    | ITPKB  |
| hsa-mir-4428    | KPNA4  |
| hsa-mir-4428    | TNPO1  |
| hsa-mir-4428    | LDLR   |
| hsa-mir-4428    | MAX    |
| hsa-mir-4428    | MECP2  |
| hsa-mir-4428    | MID1   |
| hsa-mir-4428    | MOG    |
| hsa-mir-4428    | TRIM37 |
| hsa-mir-4428    | NAB2   |
| hsa-mir-4428    | NDUFS1 |
| hsa-mir-4428    | NPM1   |
| hsa-mir-4428    | CDK14  |
| hsa-mir-4428    | PTK7   |
| hsa-mir-4428    | RAD21  |
| hsa-mir-4428    | RFX3   |
| hsa-mir-4428    | RPS15A |
| hsa-mir-4428    | SHMT2  |
| hsa-mir-4428    | SIX3   |
| hsa-mir-4428    | SNRPB  |
| hsa-mir-4428    | SOX4   |
| hsa-mir-4428    | SP1    |
| hsa-mir-4428    | STK4   |
| hsa-mir-4428    | TMBIM6 |
| hsa-mir-4428    | TFAP4  |
| hsa-mir-4428    | TFDP2  |
| hsa-mir-4428    | TPM3   |
| hsa-mir-4761-3p | RHOG   |
| hsa-mir-4761-3p | DNM2   |
| hsa-mir-4761-3p | MARK2  |
| hsa-mir-4761-3p | EVX1   |
| hsa-mir-4761-3p | HNRNPU |

|                 |          |
|-----------------|----------|
| hsa-mir-4761-3p | ID2      |
| hsa-mir-4761-3p | MAZ      |
| hsa-mir-4761-3p | MDK      |
| hsa-mir-4761-3p | PPP1R12A |
| hsa-mir-4761-3p | MAPK1    |
| hsa-mir-4761-3p | SSTR3    |
| hsa-mir-4761-3p | ZNF223   |
| hsa-mir-4761-3p | BTG2     |
| hsa-mir-4761-3p | TAGLN2   |
| hsa-mir-4761-3p | OGT      |
| hsa-mir-4761-3p | TM9SF1   |
| hsa-mir-4761-3p | ARPP19   |
| hsa-mir-4761-3p | ZNF460   |
| hsa-mir-4761-3p | MTUS2    |
| hsa-mir-4761-3p | JADE2    |
| hsa-mir-4761-3p | ZNF281   |
| hsa-mir-4761-3p | ATP6V0A2 |
| hsa-mir-4761-3p | SMUG1    |
| hsa-mir-4761-3p | TMEM2    |
| hsa-mir-4761-3p | BRD7     |
| hsa-mir-4761-3p | SH3GLB1  |
| hsa-mir-4761-3p | CTDSPL2  |
| hsa-mir-4761-3p | WDR45B   |
| hsa-mir-4761-3p | CCNL1    |
| hsa-mir-4761-3p | ENTPD7   |
| hsa-mir-4761-3p | RAB25    |
| hsa-mir-4761-3p | NABP1    |
| hsa-mir-4761-3p | SH3TC2   |
| hsa-mir-4761-3p | ZMAT4    |
| hsa-mir-4761-3p | RUBCNL   |
| hsa-mir-4761-3p | ZNF594   |
| hsa-mir-4761-3p | MIDN     |
| hsa-mir-4761-3p | MCFD2    |
| hsa-mir-4761-3p | IFFO2    |
| hsa-mir-4761-3p | TRIM71   |
| hsa-mir-4761-3p | SESN3    |
| hsa-mir-4761-3p | ZNF322P1 |
| hsa-mir-4761-3p | POTEG    |
| hsa-mir-4761-3p | POTEM    |
| hsa-mir-873-3p  | ALDH1B1  |
| hsa-mir-873-3p  | SERPING1 |
| hsa-mir-873-3p  | CA6      |
| hsa-mir-873-3p  | CD40LG   |
| hsa-mir-873-3p  | CDKN1A   |

|                |           |
|----------------|-----------|
| hsa-mir-873-3p | CHD3      |
| hsa-mir-873-3p | COL9A2    |
| hsa-mir-873-3p | CRK       |
| hsa-mir-873-3p | CSTF1     |
| hsa-mir-873-3p | EGR3      |
| hsa-mir-873-3p | ENSA      |
| hsa-mir-873-3p | ERCC4     |
| hsa-mir-873-3p | F2RL2     |
| hsa-mir-873-3p | FKBP1A    |
| hsa-mir-873-3p | GABRB1    |
| hsa-mir-873-3p | HDGF      |
| hsa-mir-873-3p | CXCL10    |
| hsa-mir-873-3p | IRAK2     |
| hsa-mir-873-3p | KCNN3     |
| hsa-mir-873-3p | LYZ       |
| hsa-mir-873-3p | NUCB1     |
| hsa-mir-873-3p | OLR1      |
| hsa-mir-873-3p | CDK16     |
| hsa-mir-873-3p | NPY4R     |
| hsa-mir-873-3p | MAP2K2    |
| hsa-mir-873-3p | PRKX      |
| hsa-mir-873-3p | TMPRSS15  |
| hsa-mir-873-3p | QSOX1     |
| hsa-mir-873-3p | RPL12     |
| hsa-mir-873-3p | RPL18A    |
| hsa-mir-873-3p | MSMO1     |
| hsa-mir-873-3p | TRAPPC2   |
| hsa-mir-873-3p | TADA2A    |
| hsa-mir-873-3p | KLF10     |
| hsa-mir-873-3p | TUFT1     |
| hsa-mir-873-3p | UGDH      |
| hsa-mir-873-3p | UQCRRS1   |
| hsa-mir-873-3p | VHL       |
| hsa-mir-873-3p | VSNL1     |
| hsa-mir-873-3p | ZFX       |
| hsa-mir-873-3p | ZNF157    |
| hsa-mir-873-3p | FZD5      |
| hsa-mir-873-3p | HIST1H2BG |
| hsa-mir-873-3p | AKR7A2    |
| hsa-mir-873-3p | EIF3H     |
| hsa-mir-873-3p | SLC16A3   |
| hsa-mir-873-3p | RASSF9    |
| hsa-mir-873-3p | B4GALT5   |
| hsa-mir-873-3p | SOCS5     |

|                |          |
|----------------|----------|
| hsa-mir-873-3p | PPIP5K1  |
| hsa-mir-873-3p | HEPH     |
| hsa-mir-873-3p | TRIM66   |
| hsa-mir-873-3p | SLC35E2  |
| hsa-mir-873-3p | ABCC5    |
| hsa-mir-873-3p | DCAF7    |
| hsa-mir-873-3p | PCGF3    |
| hsa-mir-873-3p | COLEC10  |
| hsa-mir-873-3p | NUPL2    |
| hsa-mir-873-3p | DDX19B   |
| hsa-mir-873-3p | SEPHS1   |
| hsa-mir-873-3p | KIN      |
| hsa-mir-873-3p | POFUT2   |
| hsa-mir-873-3p | CSTF2T   |
| hsa-mir-873-3p | USP22    |
| hsa-mir-873-3p | JADE2    |
| hsa-mir-873-3p | ATP6V0A2 |
| hsa-mir-873-3p | TMEM245  |
| hsa-mir-873-3p | GAPVD1   |
| hsa-mir-873-3p | FBXL3    |
| hsa-mir-873-3p | ARL5A    |
| hsa-mir-873-3p | SIGLEC8  |
| hsa-mir-873-3p | HCAR1    |
| hsa-mir-873-3p | SESN1    |
| hsa-mir-873-3p | TMED7    |
| hsa-mir-873-3p | DCTN4    |
| hsa-mir-873-3p | ANGPT4   |
| hsa-mir-873-3p | PHF7     |
| hsa-mir-873-3p | MBD3     |
| hsa-mir-873-3p | GPR173   |
| hsa-mir-873-3p | CCSER2   |
| hsa-mir-873-3p | GNL3L    |
| hsa-mir-873-3p | BNC2     |
| hsa-mir-873-3p | ZNF331   |
| hsa-mir-873-3p | CAMK2N1  |
| hsa-mir-873-3p | POLR3E   |
| hsa-mir-873-3p | ERBIN    |
| hsa-mir-873-3p | PCNP     |
| hsa-mir-873-3p | PHTF2    |
| hsa-mir-873-3p | CC2D2A   |
| hsa-mir-873-3p | USP36    |
| hsa-mir-873-3p | KIAA1456 |
| hsa-mir-873-3p | RANBP10  |
| hsa-mir-873-3p | SH2D4A   |

|                |            |
|----------------|------------|
| hsa-mir-873-3p | HERPUD2    |
| hsa-mir-873-3p | NBEAL1     |
| hsa-mir-873-3p | METRN      |
| hsa-mir-873-3p | CDC73      |
| hsa-mir-873-3p | TMC5       |
| hsa-mir-873-3p | TRMT2B     |
| hsa-mir-873-3p | CLPB       |
| hsa-mir-873-3p | ZNF611     |
| hsa-mir-873-3p | C9orf64    |
| hsa-mir-873-3p | ZBED3      |
| hsa-mir-873-3p | FAXC       |
| hsa-mir-873-3p | HES7       |
| hsa-mir-873-3p | HIST1H2AH  |
| hsa-mir-873-3p | MIDN       |
| hsa-mir-873-3p | KNSTRN     |
| hsa-mir-873-3p | TIMM29     |
| hsa-mir-873-3p | MYLK3      |
| hsa-mir-873-3p | DSEL       |
| hsa-mir-873-3p | SYAP1      |
| hsa-mir-873-3p | FAM83F     |
| hsa-mir-873-3p | TSPEAR-AS2 |
| hsa-mir-873-3p | TTC39C     |
| hsa-mir-873-3p | ZNF440     |
| hsa-mir-873-3p | CHCHD4     |
| hsa-mir-873-3p | SLC2A14    |
| hsa-mir-873-3p | ZNF417     |
| hsa-mir-873-3p | SPC24      |
| hsa-mir-873-3p | CKAP2L     |
| hsa-mir-873-3p | CNTN4      |
| hsa-mir-873-3p | PPTC7      |
| hsa-mir-873-3p | OR7D2      |
| hsa-mir-873-3p | AAED1      |
| hsa-mir-873-3p | ARID2      |
| hsa-mir-873-3p | STK32A     |
| hsa-mir-873-3p | SAMD9L     |
| hsa-mir-873-3p | RNF152     |
| hsa-mir-873-3p | TMED4      |
| hsa-mir-873-3p | SCUBE3     |
| hsa-mir-873-3p | NKAPL      |
| hsa-mir-873-3p | DEFB105A   |
| hsa-mir-873-3p | ZNF549     |
| hsa-mir-873-3p | SPRYD4     |
| hsa-mir-873-3p | C17orf105  |
| hsa-mir-873-3p | FAM102B    |

|                |           |
|----------------|-----------|
| hsa-mir-873-3p | ZNF619    |
| hsa-mir-873-3p | COX18     |
| hsa-mir-873-3p | RPL7L1    |
| hsa-mir-873-3p | C9orf47   |
| hsa-mir-873-3p | ANKRD42   |
| hsa-mir-873-3p | KLHL38    |
| hsa-mir-873-3p | SMTNL2    |
| hsa-mir-873-3p | ZNF850    |
| hsa-mir-873-3p | MTX3      |
| hsa-mir-873-3p | PLA2G2C   |
| hsa-mir-873-3p | FOXL2NB   |
| hsa-mir-873-3p | MXRA7     |
| hsa-mir-873-3p | ZNF716    |
| hsa-mir-873-3p | FBXO47    |
| hsa-mir-873-3p | DEFB105B  |
| hsa-mir-873-3p | ZNF487    |
| hsa-mir-873-3p | STMP1     |
| hsa-mir-873-3p | LINC01556 |
| hsa-mir-873-3p | HTR5A-AS1 |
| hsa-mir-873-3p | KLLN      |
| hsa-mir-873-3p | ZNF783    |
| hsa-mir-873-3p | SLFN12L   |

Table S3. Expression levels of potential miRNAs of PTTG3P in breast cancer and normal controls.

| miRNA ID        | Accession    | Average expression in cancer | Average expression in normal | P-value  |
|-----------------|--------------|------------------------------|------------------------------|----------|
| hsa-miR-505-3p  | MIMAT0002876 | 42.77                        | 39.06                        | 0.022    |
| hsa-miR-421     | MIMAT0003339 | 2.23                         | 1.15                         | 5.70E-07 |
| hsa-miR-4428    | MIMAT0018943 | 0.01                         | 0.01                         | 0.77     |
| hsa-miR-873-3p  | MIMAT0022717 | 0.04                         | 0.01                         | 0.05     |
| hsa-miR-3167    | MIMAT0015042 | 0.01                         | 0.01                         | 0.8      |
| hsa-miR-876-5p  | MIMAT0004924 | 0.04                         | 0.03                         | 0.72     |
| hsa-miR-4761-3p | MIMAT0019909 | 0.01                         | 0.01                         | 0.52     |
| hsa-miR-129-5p  | MIMAT0000242 | 4.71                         | 6.6                          | 2.70E-15 |
| hsa-miR-212-3p  | MIMAT0000269 | 3.97                         | 4.03                         | 0.89     |
| hsa-miR-132-3p  | MIMAT0000426 | 74.61                        | 98.08                        | 0.093    |
| hsa-miR-376c-3p | MIMAT0000720 | 4.42                         | 9.37                         | 1.80E-14 |
| hsa-miR-383-5p  | MIMAT0000738 | 1.67                         | 4.3                          | 2.00E-41 |

Table S4. Co-expressed genes of PTTG3P obtained by UALCAN database.

---

Co-expressed genes of PTTG3P

---

PTTG1  
UBE2C  
CDCA3  
TROAP  
AURKB  
CENPA  
CKS2  
SKA1  
CDC25C  
CCNB2  
CDC20  
CENPW  
KIF18B  
PIF1  
KIF2C  
HMMR  
CDC45  
UBE2T  
HJURP  
KIFC1  
CCNB1  
ZNF695  
RAD54L  
TPX2  
TACC3  
E2F8  
E2F1  
KIF20A  
NCAPG  
OIP5  
CDCA8  
TUBA1C  
NDC80  
SNRPG  
PLK1  
UBE2S  
CKS1B  
SPC25  
LMNB2  
PA2G4P4  
CCDC99  
SNRPA



MRPS5  
KIF15  
FAM64A  
C1orf135  
SNRPD1  
C16orf61  
CDT1  
UQCRH  
CDKN3  
DSCC1  
BIRC5  
NUF2  
FAM54A  
C17orf53  
MELK  
MAGOH  
FAM72B  
FOXM1  
PSRC1  
TOMM5  
CENPN  
DTD1  
GTSE1  
TCOF1  
LYAR  
BOLA3  
DEPDC1B  
H2AFZ  
TRIP13  
DDX12  
DLGAP5  
LMNB1  
EZH2  
ORC6L  
MND1  
RANBP1  
RNASEH2A  
CDC25A  
KIF4A  
RFC4  
SKA3  
TTK  
NUSAP1  
CHEK2

KIF11  
CDKN2A  
CEP55  
NOP2  
EXO1  
NEK2  
WDR4  
RECQL4  
ORC1L  
LSM2  
FAM83D  
RAD51AP1  
TUBA1B  
TRAIP  
PHF19  
FAM136A  
MYBL2  
SGOL1  
MIR17HG  
DBF4  
MCM7  
UQCRHL  
CCNA2  
STMN1  
NOP16  
NDUFA9  
CDCA5  
DTYMK  
PSMB2  
RAD51  
SNRPC  
MRPL51  
PKMYT1  
C15orf23  
BUB1  
MXD3  
EPR1  
POLQ  
SHFM1  
PFDN2  
NDUFAF4  
TPI1  
CENPH  
PBK

PDCD5  
LOC388955  
DEPDC1  
FEN1  
C6orf129  
CCDC58  
CDCA7  
HMGB2  
SLC25A19  
KIF23  
MFSD2B  
ERCC6L  
PSMG1  
ATP5EP2  
NCAPH  
CDK1  
MAD2L1  
NPM3  
ECE2  
PDSS1  
C9orf40  
ASPM  
NEIL3  
GSG2  
LOC100130932  
GAPDH  
MED30  
NUDT1  
ESPL1  
FBXO5  
PPIL5  
FAM72A  
DONSON  
GMNN  
HMGA1  
KIF14  
MAGOHB  
TCF19  
ATP5J2  
MLF2  
PRELID1  
FANCA  
POLR2F  
LOC341056

RFC2  
HNRNPAB  
AURKAPS1  
SF3B14  
GRK6  
RPIA  
RCCD1  
KIF18A  
CENPM  
PDHA1  
GINS1  
RHEB  
AURKA  
THOC4  
RRP1  
NCAPG2  
BUB1B  
BRX1  
TOMM40  
LBR  
CTPS  
ENY2  
WDR67  
NUDT5  
CHAC2  
CEBPB  
SNHG1  
ASF1B  
NXT1  
LSM7  
TXN  
C12orf48  
C5orf34  
DDX11  
NASP  
DDX39  
POC1A  
C9orf100  
FANCG  
BLM  
GPSM2  
FAM72D  
DAZAP1  
ANP32E

PSMG3  
FANCE

---

Table S5. Sequences of primers used in this study.

---

| qRT-PCR primers |                | Sequences               |
|-----------------|----------------|-------------------------|
| PTTG3P          | Forward primer | GGGGTCTGGACCTTCAATCAA   |
| PTTG3P          | Reverse primer | GCTTTAGGTAAGGATGTGGGA   |
| PTTG1           | Forward primer | ACCCGTGTGGTTGCTAAGG     |
| PTTG1           | Reverse primer | ACGTGGTGTTGAAACTTGAGAT  |
| PTTG2           | Forward primer | ATTGGAGAACCAGGCACC      |
| PTTG2           | Reverse primer | CGTCGTGTTAAAACCTTGAGATA |
| U6              | Forward primer | CTCGCTTCGGCAGCACA       |
| U6              | Reverse primer | GAAGCCUAGAGGAUUGAAGGG   |
| GAPDH           | Forward primer | AATGGACAACCTGGTCGTGGAC  |
| GAPDH           | Reverse primer | CCCTCCAGGGGATCTGTTTG    |

---
